# Supplementary material for: Anatomy of a mega-radiation: Biogeography and niche evolution in Astragalus
Source: bioRxiv or medRxiv preprint supplement (doi:10.1101/2023.06.27.546767), 2023-06-29
Supplement: Supplementary file [file media-1.pdf]

Anatomy of a mega-radiation: Biogeography and niche evolution in *Astragalus*

R.A. Folk, J.L.M. Charbonneau, M. Belitz, T. Singh, P.S. Soltis, D.E. Soltis, R.P. Guralnick,  
C.M. Siniscalchi

**Fig. S1.** Phylogeny, broken in three parts for display as indicated. Branch lengths represent coalescent units, and are arbitrarily plotted as 1 for tips. Support values plotted on branches represent local posterior probabilities (LPP), and are only plotted where they exceed 0.5. Tip labels in *Astragalus* are plotted by group, then section, then binomial. E.g., *Astragalus mongholicus* is within *Astragalus* sect. *Nuculiella* of group A, and therefore is rendered as “GA\_Nuculiella\_Astragalus\_chinensis”.

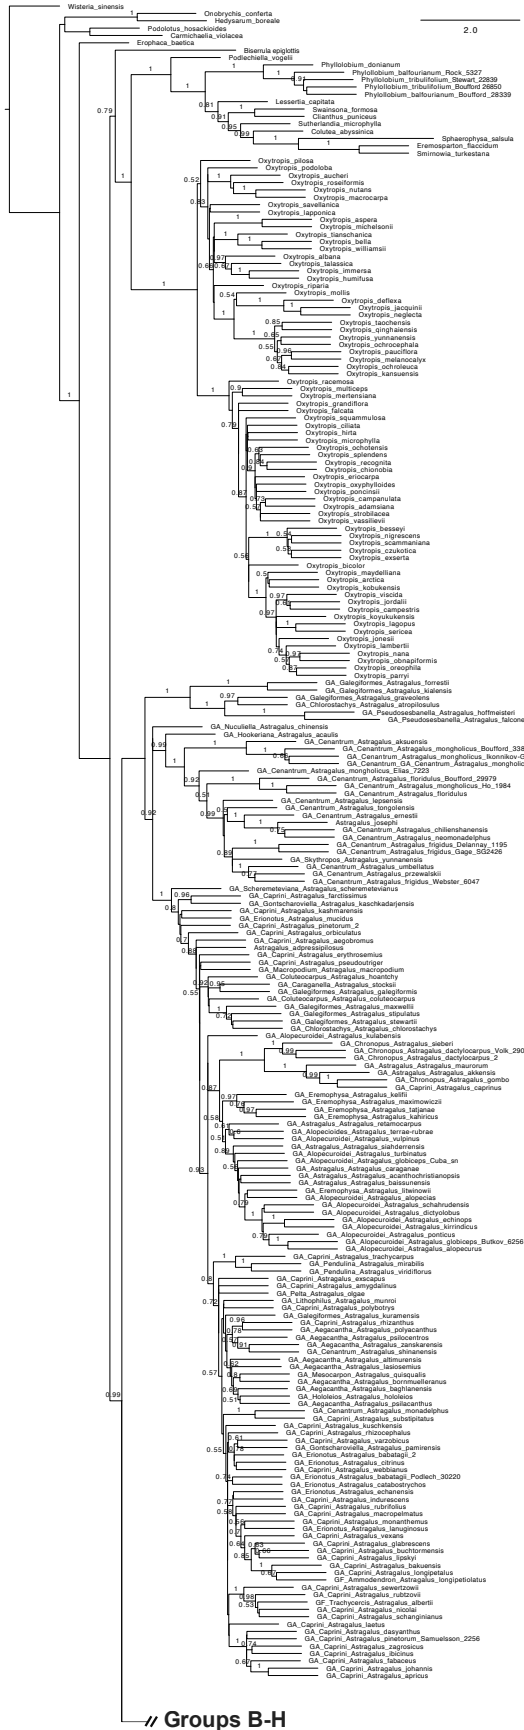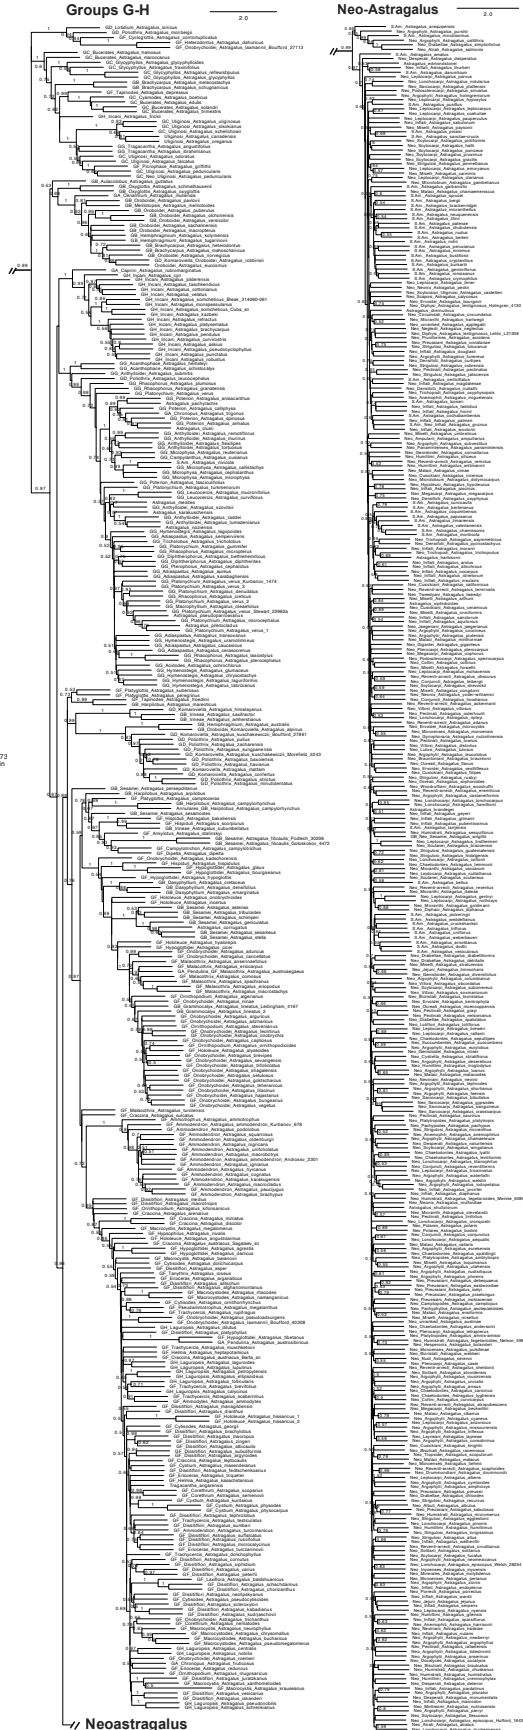

**Fig. S2.** Plot of BAMM net diversification rate shifts. Red dots indicate shifts in BAMM rate regime; branch colors represent net diversification per the legend, in events per million years.

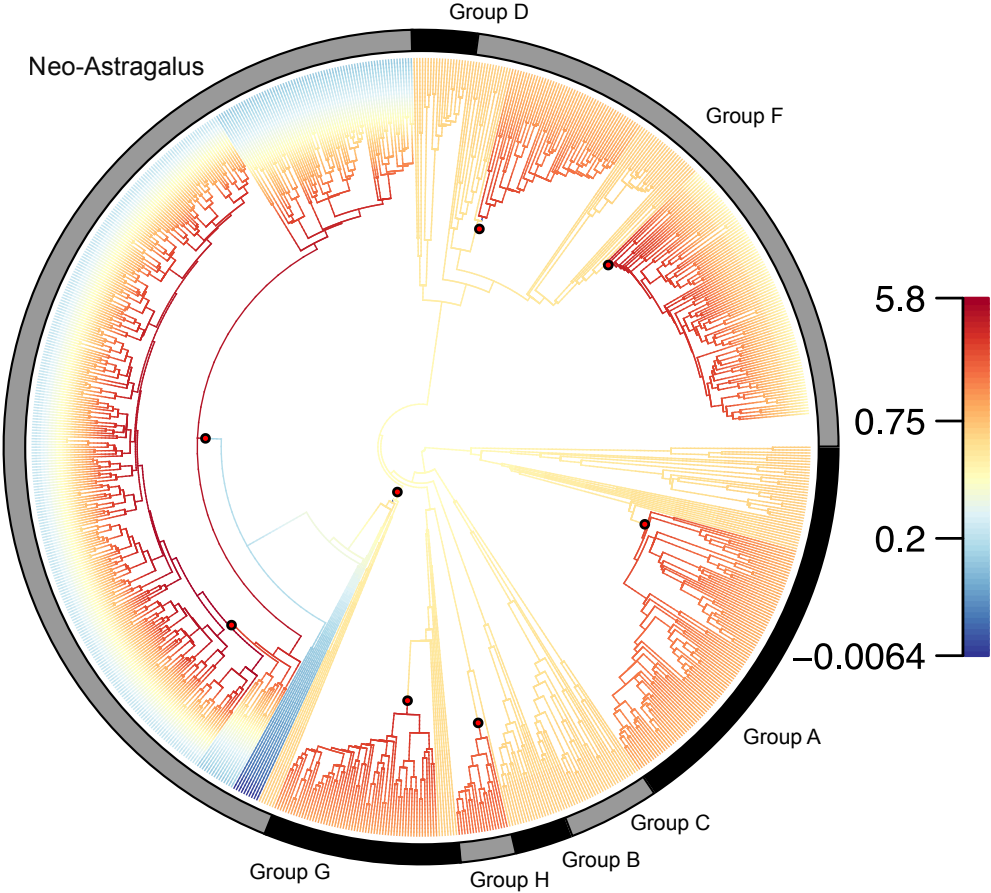

Fig. S3. Ancestral reconstructions for the 9 predictor variables not shown in the main text.

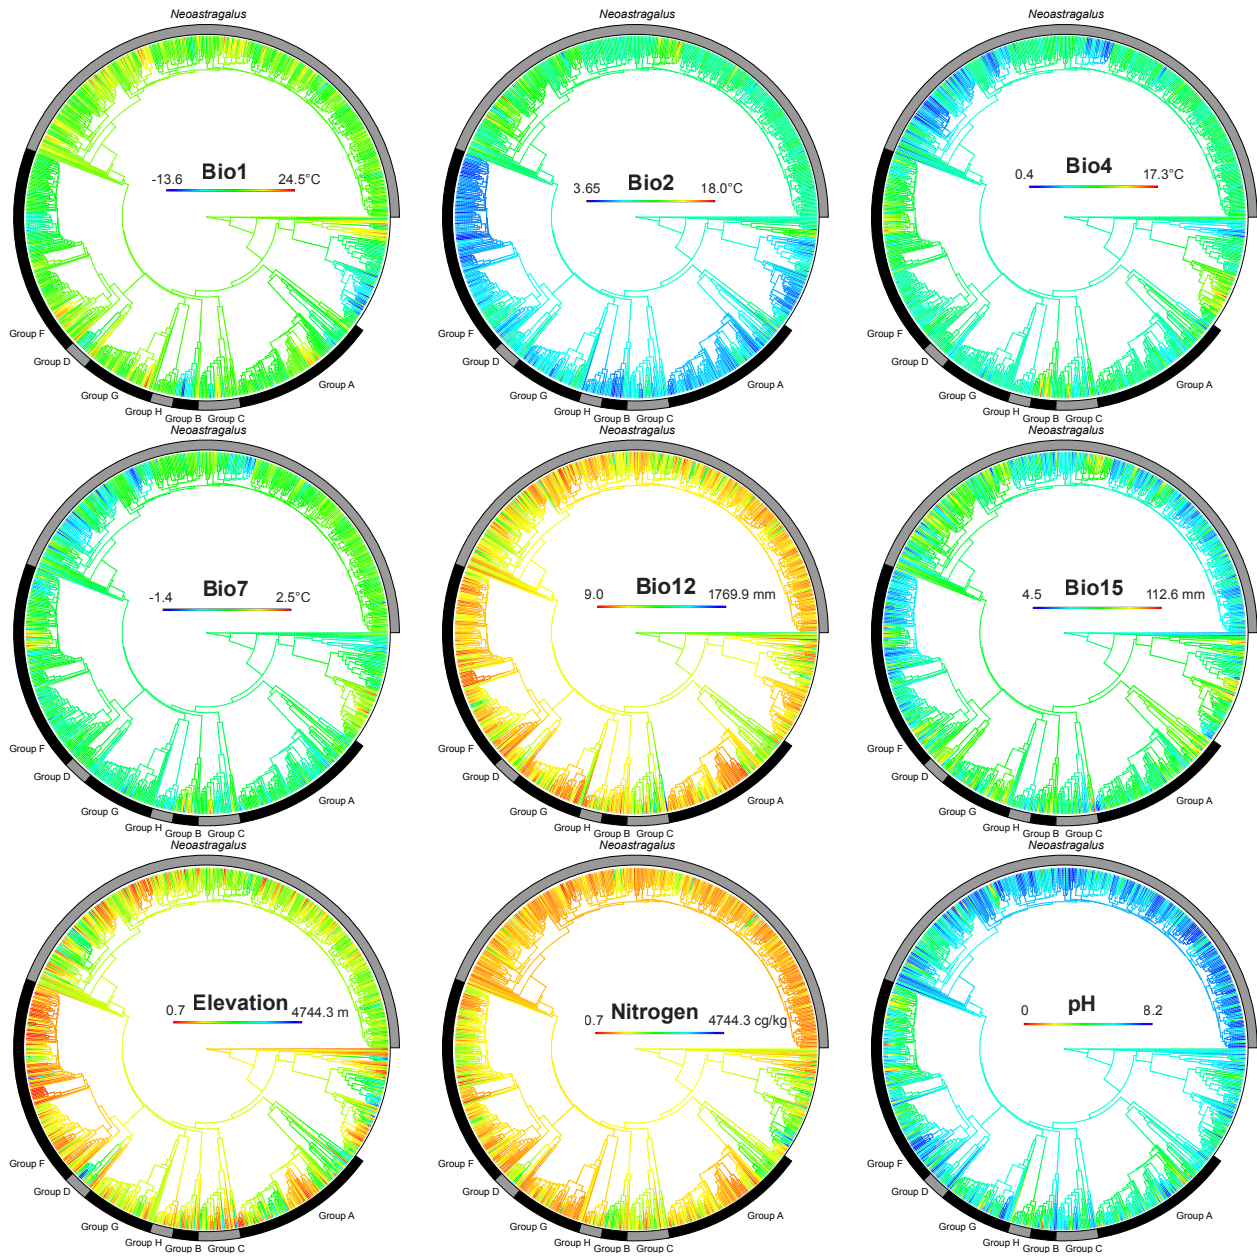

**Fig. S4.** Phylogeny, broken in two parts for display as indicated. Branch shape sizes and labels indicate reconstructed chromosome number; branch colors indicate posterior probability, with redder colors indicating higher values.

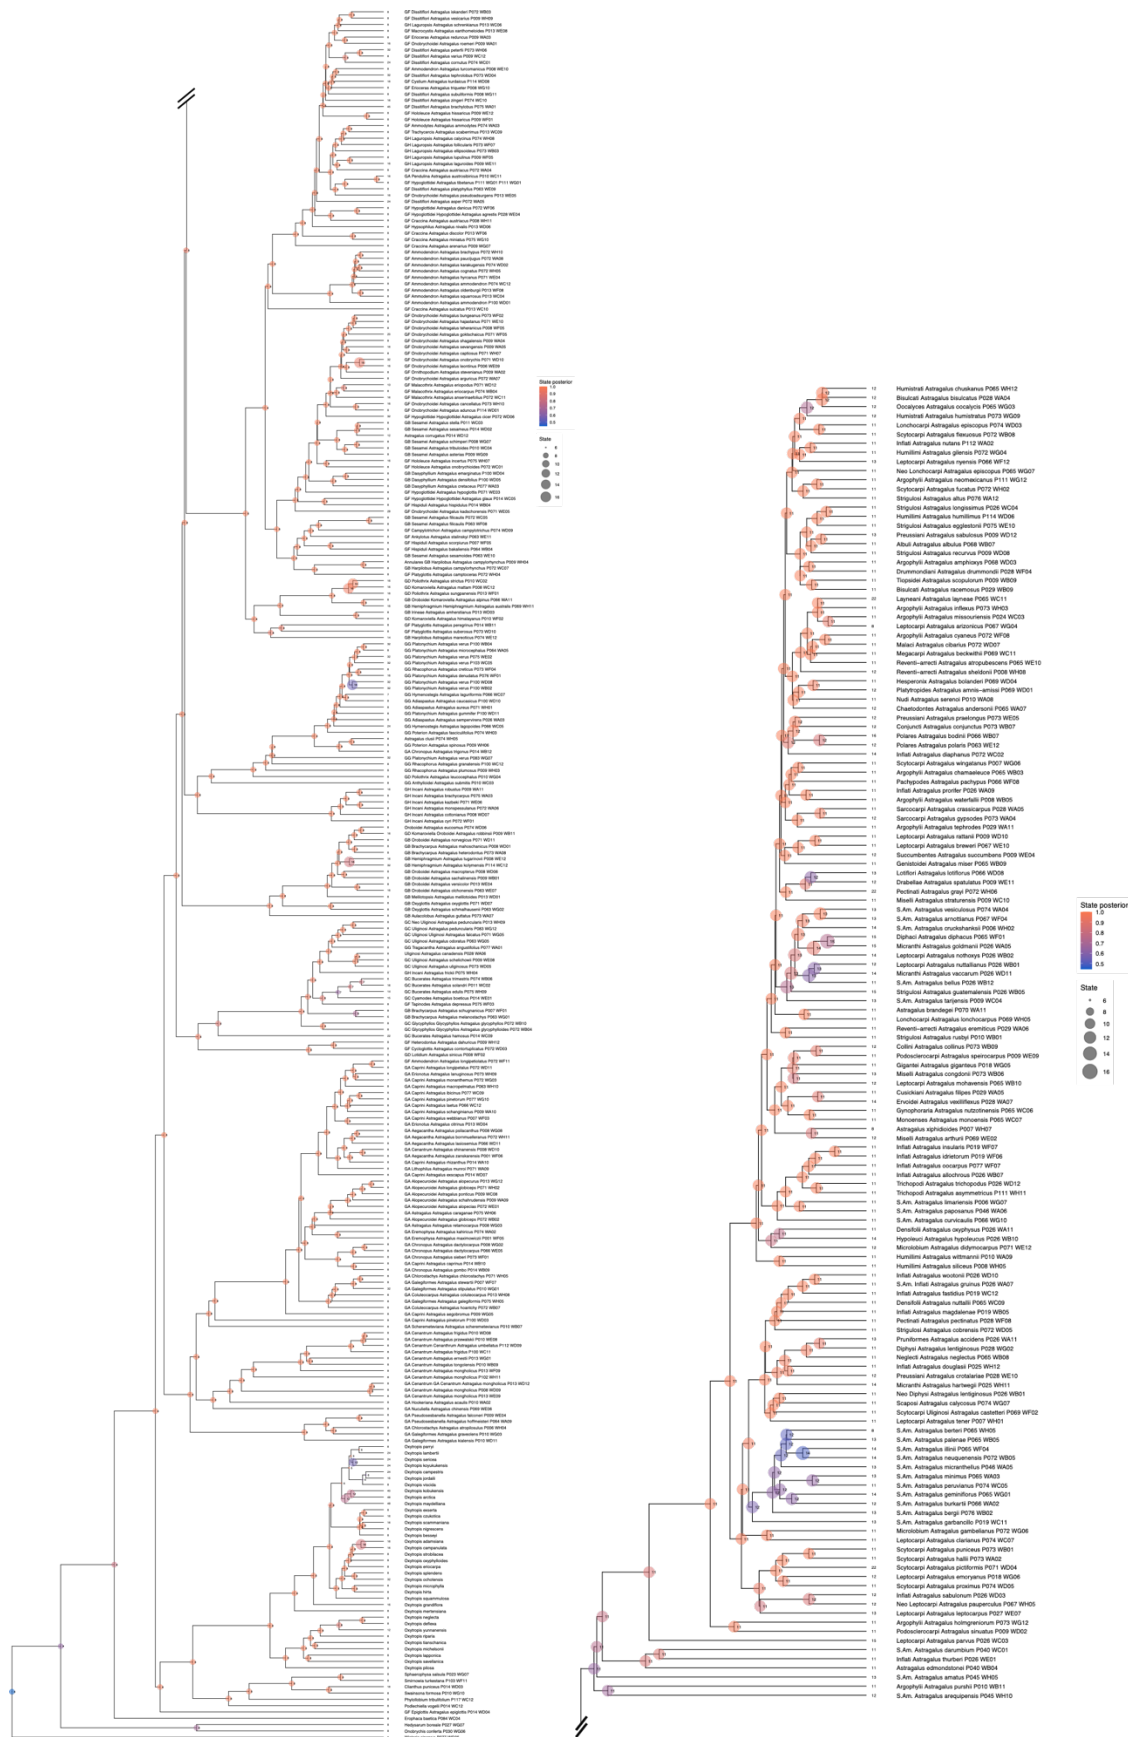

Fig. S5. Complete biogeographic result (cf. Fig. 1 in main text).

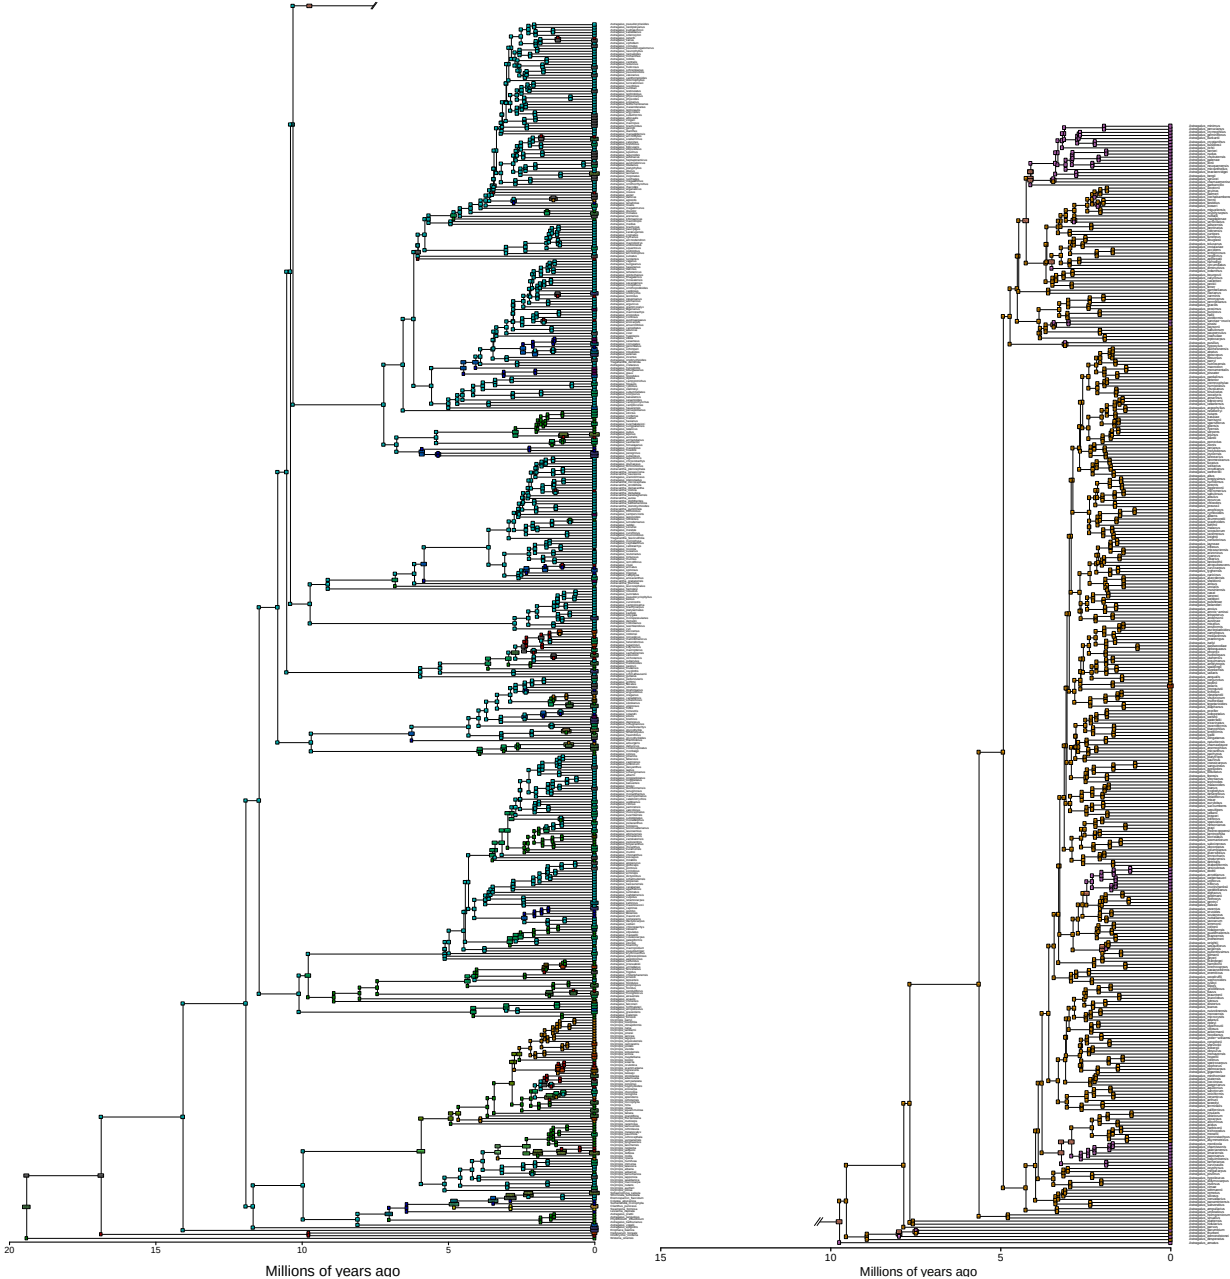



**Fig. S6.** Number of HybPiper paralog flags per sample, mapped across all samples on the pre-curation phylogeny. Warmer colors indicate greater numbers of paralogs.

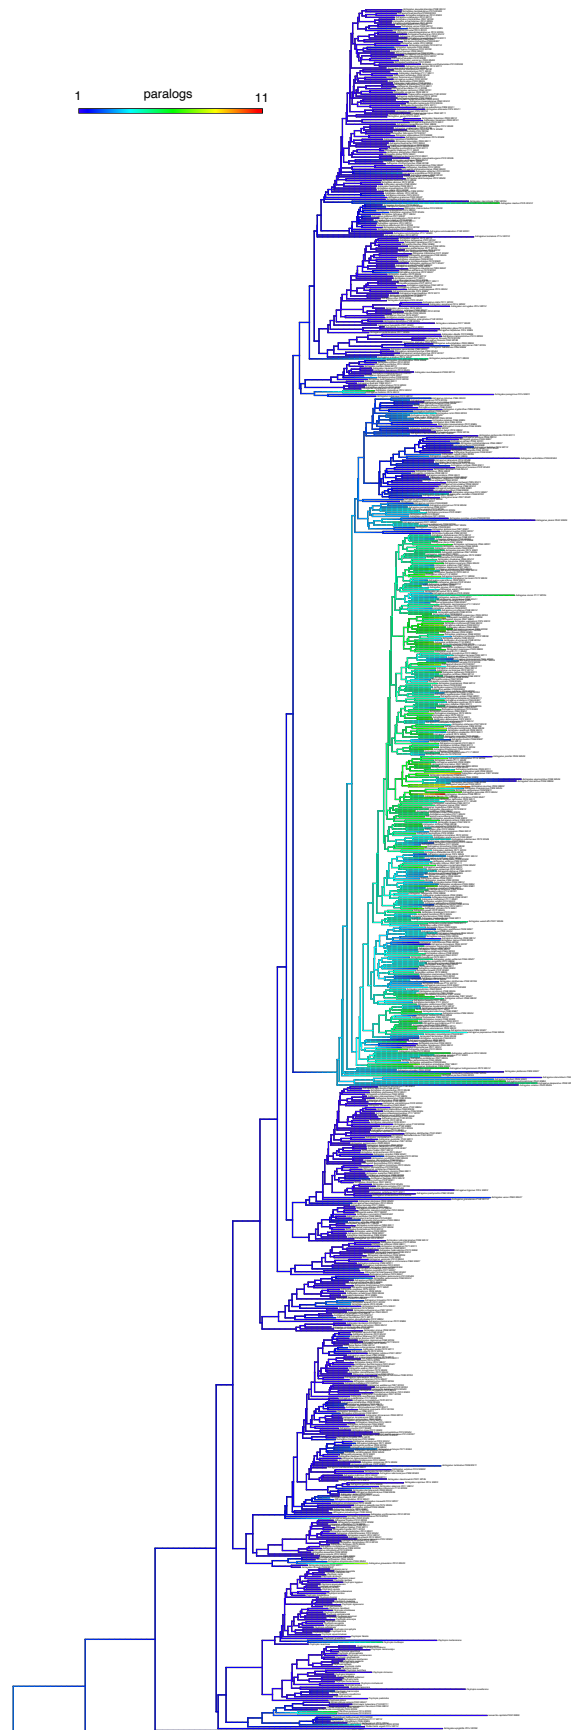

**Fig. S7.** Number of loci assembled to at least 50% of the reference, mapped across all samples on the pre-curation phylogeny. Warmer colors indicate more loci at 50%.

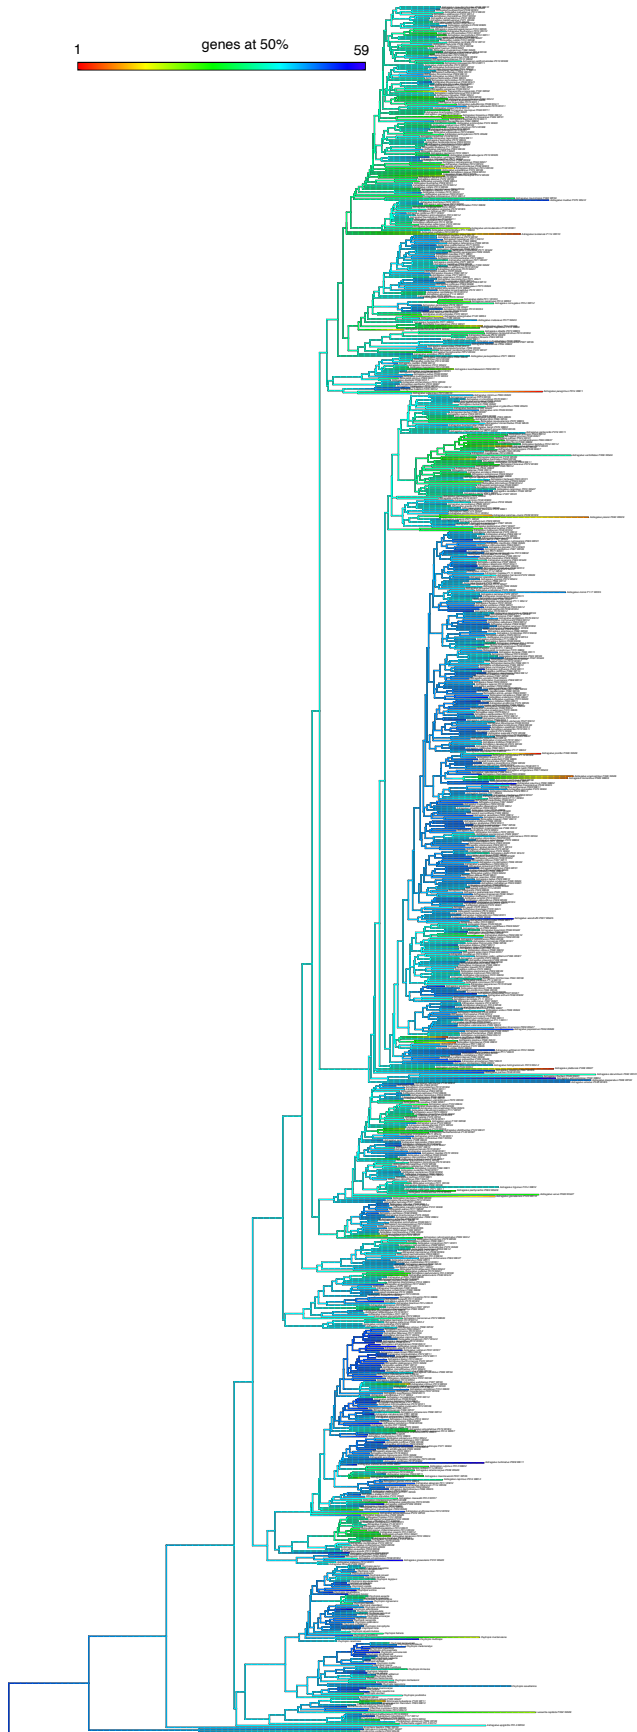



| Species (Segregate)                     | Collector   | Collector number | Herbarium | Locality                                             | Year   | NitFix UUID                          |
|-----------------------------------------|-------------|------------------|-----------|------------------------------------------------------|--------|--------------------------------------|
| <i>Astragalus acanthochristianopsis</i> | Podlech     | 29236            | HUH       | Afghanistan: Herat                                   | 1977   | fd854b03-7a74-4425-bb5f-8c0b1d91807e |
| <i>Astragalus acaulis</i>               | Woo         | 425              | HUH       | People's Republic of China: Yunnan: De Qin           | 2002   | fbafb346-8cba-4158-82c0-caa92154f1f5 |
| <i>Astragalus accidens</i>              | Spellenberg | 2296             | TEX       | United States of America: California: Trinity        | 1970   | 21984a3d-fb2f-4b43-b8d2-f1ac34079727 |
| <i>Astragalus ackermanii</i>            | Ackerman    | 30139            | NY        | United States of America: Nevada: Clark              | 1979   | d6350763-c09f-49e6-a87b-3e6c78ff5c73 |
| <i>Astragalus acutirostris</i>          | Gentilcore  | 886              | NY        | United States of America: Nevada: Clark              | 2016   | d633166e-5c43-4266-9e13-f8e3e218bde7 |
| <i>Astragalus adanus</i>                | Ertter      | 21340            | NY        | United States of America: Idaho: Ada                 | 2013   | df6b4951-13a7-4828-b45e-55be65408ca1 |
| <i>Astragalus adpressipilosus</i>       | Vvedensky   | 6201             | NY        | Uzbekistan: Surxondaryo                              | 1929   | d021d9ad-f028-44c6-8094-0ca7848975ac |
| <i>Astragalus aduncus</i>               | [Cyrillic]  |                  | NY        | United States of America: New York                   | 2018   | cf184ec2-cc82-4d32-ba20-79b7a2b72d61 |
| <i>Astragalus adzharicus</i>            | Sytin       | 7129             | NY        | Georgia: Ajaria: Khulo                               | 1986   | d1c60a08-5415-4cc8-af7e-36a1fef22901 |
| <i>Astragalus aegobromus</i>            | Litvinov    | s.n.             | NY        | Turkey: Kars                                         | 1914   | cf1587e1-b97b-4359-a76f-1b52a3b85a95 |
| <i>Astragalus aegobromus</i>            | Litvinov    | s.n.             | MO        | Turkey: Kars: Sarikamish                             | 1914   | 2ed50c28-a932-4b42-9a94-8fad7801a8ed |
| <i>Astragalus aequalis</i>              | Johnson     | 89               | NY        | United States of America: Nevada: Clark              | 1965   | df4877bf-5177-4e9d-b49c-701fc408754f |
| <i>Astragalus afghanomontanus</i>       | Volk        | 2735             | NY        | Afghanistan: Bamian                                  | 1952   | ad380c3c-08d6-4f6f-8940-bda2b7f09ea6 |
| <i>Astragalus agrestis</i>              | Krivda      | s.n.             | FLAS      | Canada: Saskatchewan: Choiceland                     | 1965   | e9da70d3-b54f-46b0-80c8-7e66be95e3d1 |
| <i>Astragalus akkensis</i>              | Lewalle     | 13669            | MO        | Morocco                                              | 1992   | 1580ade8-cd55-435c-a98a-a9deded28a32 |
| <i>Astragalus aksuensis</i>             | Roldugin    | 5376             | HUH       | Kazakhstan: Alatau                                   | 1968   | fb508295-95f7-4095-aff0-1f58bd5c44b4 |
| <i>Astragalus albens</i>                | White       | 92-154           | TEX       | United States of America: California: San Bernardino | 1992   | 21aa2771-430b-442b-a50a-646990221be1 |
| <i>Astragalus albertii</i>              | [None]      |                  | NY        | [None]                                               | [None] | cf0b4084-d85c-43f7-a69e-494d644d2fd1 |
| <i>Astragalus albicaulis</i>            | Sagalaev    | 19.05            | NY        | Russian Federation: Volgograd: Volgograd             | 1979   | d1bcc2a6-d807-4df1-8ace-5d93acab50dd |
| <i>Astragalus albulus</i>               | Atwood      | 23126            | NY        | United States of America: Arizona: Apache            | 1997   | d625a1e6-1a02-41c3-9ed3-bc6922833fa6 |
| <i>Astragalus algerianus</i>            | Dubuis      | 13217            | MO        | Algeria: M'Sila: Bou-Saada                           | 1986   | 1641c922-767a-4190-8060-9e5f3dc2f380 |
| <i>Astragalus alitschuri</i>            | Gusev       | 4583             | HUH       | Tajikistan                                           | 1958   | fb00fbee-70d4-4e4f-ab32-a4fd4d3e2417 |
| <i>Astragalus allochrous</i>            | NA          | NA               | NA        | Mexico: Sonora: Agua Prieta                          | 2003   | 16410fac-8fa7-481d-be8c-e633120a6272 |
| <i>Astragalus alopecias</i>             | Dewey       | D-2012           | NY        | Kazakhstan                                           | 1977   | cf0a0bb4-c1c7-4719-9ba7-e3b2b192eafa |
| <i>Astragalus alopecuroides</i>         | Jahandiez   | 180              | MO        | Morocco                                              | 1925   | 15828117-a8ff-43ac-a314-3f6642f30230 |
| <i>Astragalus alopecurus</i>            | Alianskaja  | 19.03            | HUH       | Russian Federation: Gorno-Altajsk: Onghudaj          | 1972   | faf3e866-5f85-4ca1-a889-394136d0d4ff |

|                                 |               |         |      |                                                        |      |                                      |
|---------------------------------|---------------|---------|------|--------------------------------------------------------|------|--------------------------------------|
| <i>Astragalus alpinus</i>       | Smith         | 1914    | NY   | United States of America: Alaska: Fairbanks North Star | 1953 | df46fd23-494a-4f77-a413-9744c245340d |
| <i>Astragalus altimurensis</i>  | Volk          | 71/430a | NY   | Afghanistan: Paktia: Gardez                            | 1971 | ad301a32-de96-4d0a-95c2-f25ddc8fd5d3 |
| <i>Astragalus altus</i>         | Spellenberg   | 10470   | NY   | United States of America: New Mexico: Otero            | 1990 | d60ba04d-ab23-4d23-b57b-6b2bf2e2a420 |
| <i>Astragalus alvordensis</i>   | Halse         | 6954    | NY   | United States of America: Oregon: Harney               | 2006 | d605eb4d-c69c-43aa-8cb5-d46ac4866d6f |
| <i>Astragalus alyssoides</i>    | Sytin         | 7136    | NY   | Azerbaijan: Talysh: Zuvant                             | 1985 | ad449517-da39-41f0-982e-244cb7dec8c2 |
| <i>Astragalus amatus</i>        | Jiles         | 1732    | OS   | Chile: Limarv ≠                                        | 1950 | e4bcd0e3-fe65-4578-a354-af5324dc7c68 |
| <i>Astragalus amblytropis</i>   | Rosentreter   | 4366    | NY   | United States of America: Idaho: Lemhi                 | 1987 | d602e66b-30ac-471d-987d-23df59e5c3dc |
| <i>Astragalus americanus</i>    | Zobel         | 112     | FLAS | United States of America: Colorado                     | 1939 | e9d8bf16-16da-49ff-bac9-6e91de15af95 |
| <i>Astragalus amherstianus</i>  | Shah          | 1937    | HUH  | Pakistan                                               | 1977 | fd838155-5c15-49bd-a632-e5b8a5a9da66 |
| <i>Astragalus ammodendron</i>   | Androssv      | 3301    | NY   | Kazakhstan: Unknown: Unknown                           | 1908 | cf08fca8-7165-442a-ba2c-05d35d19567b |
| <i>Astragalus ammodendron</i>   | Kurbanov      | 678     | MO   | Turkmenistan: Balkhan                                  | 2001 | 0c8e8aee-4d5a-4c7f-9d6e-c10e3071e475 |
| <i>Astragalus ammodytes</i>     | Veresczagin   | 7422    | NY   | Kazakhstan                                             | 1925 | d1bb3e7f-1a2a-47aa-865d-d23c491024dc |
| <i>Astragalus ammotrophus</i>   | [Cyrillic]    | 63      | NY   | Uzbekistan                                             | 1968 | d013fbae-a544-48ce-96c7-333e38e60428 |
| <i>Astragalus amnis-amissi</i>  | Duane Atwood  | 10295   | NY   | United States of America: Idaho: Custer                | 1984 | df3be8be-7267-4d01-9c40-019369b42b3d |
| <i>Astragalus amphioxys</i>     | Atwood        | 25392   | NY   | United States of America: Arizona: Navajo              | 2000 | df3586ab-9e00-43d4-b60f-16dd2d9aea44 |
| <i>Astragalus ampullarius</i>   | Neese         | 16818   | NY   | United States of America: Utah: Kane                   | 1985 | cc042c24-a746-44e0-bad7-f6814dd7c813 |
| <i>Astragalus amygdalinus</i>   | Popov         | 351     | NY   | Uzbekistan                                             | 1926 | d00f73bb-ef5e-44fc-a11d-763dd0b123f6 |
| <i>Astragalus andersonii</i>    | Cronquist     | 8453    | NY   | United States of America: California: Lassen           | 1959 | cb2fd040-c763-4a97-9d0f-9feb83940e97 |
| <i>Astragalus anemophilus</i>   | Morita        | 503     | CAS  | Mexico: Baja California: Ensenada                      | 1999 | 163d2ede-6ecc-4449-8205-bbb111ba56ea |
| <i>Astragalus angarensis</i>    | [Cyrillic]    | 3302a   | MO   | Russian Federation: Irkutsk: Balagansky                | 1907 | 0c8e29f4-15f1-4b7f-a131-cc2d0f29496a |
| <i>Astragalus angustifolius</i> | Donmez        | 3747    | NY   | Turkey                                                 | 1993 | ac0b563c-83b5-40ec-8905-d27776c90dbe |
| <i>Astragalus angustissimus</i> | Goloskokov    | s.n.    | NY   | [Cyrillic]                                             | 1963 | d009e8a4-f51b-4b21-90b2-9a27f86ab354 |
| <i>Astragalus anisus</i>        | Taylor        | 5308    | NY   | United States of America: Colorado: Gunnison           | 1998 | d600ddf7-5af3-4325-bf8d-c36e8b108493 |
| <i>Astragalus annularis</i>     | Wojciechowski | 159     | NY   | United States of America: Arizona                      | 1992 | ac182634-e4dd-4cd6-a321-4e14bfd2d201 |

|                                   |             |         |     |                                                          |      |                                      |
|-----------------------------------|-------------|---------|-----|----------------------------------------------------------|------|--------------------------------------|
| <i>Astragalus anserinaefolius</i> | Ledingham   | 4074    | NY  | Islamic Republic of Iran                                 | 1965 | ac1b55e8-93a3-4082-b1bb-9560fc36b9c0 |
| <i>Astragalus anserinus</i>       | Hardy       | 832     | NY  | United States of America: Utah:<br>Box Elder             | 1993 | d6013bed-4ac0-4c7f-80f4-0c616e36c370 |
| <i>Astragalus applegatii</i>      | Kagan       | 6068503 | NY  | United States of America: Oregon:<br>Klamath             | 1985 | d5f642e9-95d2-4fdd-a85e-757329e599b8 |
| <i>Astragalus apricus</i>         | Ledingham   | 4092    | NY  | Islamic Republic of Iran                                 | 1965 | ac7e4a39-96bf-427a-a0a1-44f7bb17c7f3 |
| <i>Astragalus aquilonius</i>      | Reveal      | 4483    | NY  | United States of America: Idaho:<br>Lemhi                | 1976 | cb2fa16b-1053-4add-894f-33321630df7e |
| <i>Astragalus arenarius</i>       | Asplund     | 1076    | NY  | Sweden: Skane: Simrishamn                                | 1928 | d1b0c116-8659-47e1-ad16-de0f09fcc160 |
| <i>Astragalus arequipensis</i>    | Ricardi     |         | NA  | Chile: Antofagasta (II): El Loa                          | 1961 | e4b6eb72-3464-43af-a7d6-6769760565d9 |
| <i>Astragalus arganaticus</i>     | Goloskokov  | 4274    | NY  | Kazakhstan                                               | 1956 | cfff2200-3b09-429a-98e7-0184230de39a |
| <i>Astragalus argophyllus</i>     | Massatti    | 4830    | NY  | United States of America:<br>Wyoming: Fremont            | 2006 | cb2b7653-9193-41c3-a9c3-67ae1242f480 |
| <i>Astragalus arguricus</i>       | Sytin       | 6528    | NY  | Georgia: Samtskhe-Javakheti                              | 1981 | d1a438d3-8eb3-48c3-8a8b-0f08cd37e1f1 |
| <i>Astragalus argyroides</i>      | USDA-ARS    | 314143  | NY  | Uzbekistan                                               | 1977 | cffe79f8-a553-4fe8-9072-3574e516091c |
| <i>Astragalus aridus</i>          | Wiggins     | 15743   | CAS | Mexico: Baja California: Mexicali                        | 1960 | 163bf792-235d-40f6-8459-75c032239ed0 |
| <i>Astragalus arizonicus</i>      | Barneby     | 18096   | NY  | United States of America: Arizona:<br>Yavapai            | 1986 | cb27a811-dd3a-48de-a9fd-60f67dd44e4d |
| <i>Astragalus armatus</i>         | Merello     | 2842    | MO  | Morocco                                                  | 2004 | 15800fae-4d35-4eee-bec4-cd5e93ed3b3b |
| <i>Astragalus arnottianus</i>     | Landrum     | 8225    | NY  | Chile: Santiago Metropolitan                             | 1993 | d258cec1-c286-4fb2-ae6f-c95f3984c718 |
| <i>Astragalus arpilobus</i>       | Rechinger   | 57402   | NY  | Islamic Republic of Iran: E.<br>Khorasan: Unknown        | 1975 | ab793654-64dd-47cb-8b1b-b1edfff8ae78 |
| <i>Astragalus arthurii</i>        | Hufford     | 894     | NY  | United States of America:<br>Washington: Asotin          | 1995 | d5f1bdd6-2674-44a3-b33d-8d334fbc2af  |
| <i>Astragalus asclepiadoides</i>  | Alexander   | 1164    | NY  | United States of America: Utah:<br>Emery                 | 2001 | cb2aa313-5852-47ad-a71b-fad79f4bd63f |
| <i>Astragalus askius</i>          | Ledingham   | 4181    | NY  | Islamic Republic of Iran:<br>Mazandaran                  | 1965 | ac793212-7577-4367-b1aa-fd500a8c00ae |
| <i>Astragalus asper</i>           | Barta       | s.n.    | NY  | Austria: Vienna                                          | 2008 | d19a605a-2e0f-4ae6-8d44-38eae2634203 |
| <i>Astragalus asterias</i>        | Lachashvili | 390     | NY  | GeorgiaDedoplistskaro                                    | 2006 | d19610e3-d875-49dc-ad85-4803869af55b |
| <i>Astragalus asymmetricus</i>    | Bedell      | 97-1    | NY  | United States of America:<br>California: San Luis Obispo | 1964 | cb27a7ac-f323-4720-a431-7241f2b3a5ae |
| <i>Astragalus atratus</i>         | Pinzl       | 9449    | NY  | United States of America: Nevada:<br>Lander              | 1991 | d5edfa4e-fbdc-474c-8a3a-6238ddb5c0a8 |



|                                                       |              |         |     |                                                    |      |                                      |
|-------------------------------------------------------|--------------|---------|-----|----------------------------------------------------|------|--------------------------------------|
| <i>Astragalus atropilosulus</i>                       | Rwaburindore | 4779    | NA  | Uganda: Buhweju                                    | 2000 | e5b14f77-4e08-4331-8eeb-a8d2f63e5992 |
| <i>Astragalus atropubescens</i>                       | Gray         | 5582    | NY  | United States of America: Idaho: Idaho             | 2009 | d5ed5b26-0143-45e3-a734-9a4d2f49437e |
| <i>Astragalus aureus</i>                              | Ledingham    | 5241    | NY  | Armenia                                            | 1970 | ac78aecf-6900-4857-b8e5-134362e328ff |
| <i>Astragalus austinae</i>                            | Genz         | 8526    | NY  | United States of America: Nevada: Washoe           | 1978 | cb1211a4-609c-4b4a-8299-0ebf39e1ac5f |
| <i>Astragalus australis</i>                           | Wetherell    | 784     | NY  | United States of America: Alaska: Northwest Arctic | 1963 | df30e7e0-7567-479d-81d3-8aec0f9d07ec |
| <i>Astragalus austriacus</i>                          | Barta        | s.n.    | NY  | Austria: Niederosterreich                          | 2009 | d219b02e-83f0-44fc-867f-15e701167812 |
| <i>Astragalus austriacus (Astragalus tenuifolius)</i> | Sagalaev     | s.n.    | NY  | Russian Federation: Saratov                        | 1993 | cf984c50-2aef-4206-afb1-1d5b88932378 |
| <i>Astragalus austroaegaeus</i>                       | Rechinger    | 7496    | NY  | Greece                                             | 1935 | d211012b-159e-4f43-868f-99899afe0852 |
| <i>Astragalus austrosibiricus</i>                     | Pobedimova   | 445     | HUH | Mongolia                                           | 1930 | 0093e40a-6469-4ae2-b897-c327e3f21ceb |
| <i>Astragalus babatagii</i>                           | [Cyrillic]   | 63      | HUH | Russian Federation                                 | 1959 | 0002cfe7-61fb-4339-974c-36e45fe75969 |
| <i>Astragalus babatagii</i>                           | Podlech      | 30220   | HUH | Afghanistan: Takhar                                | 1977 | fd33dff3-3d7f-4d52-991b-9b2bd06597be |
| <i>Astragalus baghlanensis</i>                        | Podlech      | 30326 b | NY  | Afghanistan: Baghlan                               | 1977 | abf93cc7-8c50-42cf-a06d-196e206c3c74 |
| <i>Astragalus baissunensis</i>                        | Vvedensky    | 6204    | NY  | Uzbekistan: Surxondaryo                            | 1930 | ceed7a58-ab17-4527-a5b1-8695bf05ea0d |
| <i>Astragalus bakaliensis</i>                         | Volk         | 1855b   | NY  | Afghanistan: Kabul                                 | 1959 | abf3f532-55e2-44b1-9b4f-ef7812164eca |
| <i>Astragalus bakuensis</i>                           | [Cyrillic]   | s.n.    | NY  | Azerbaijan: Transcaucasia                          | 1933 | cef3b32c-7bf0-448e-b478-dc7c330ee12d |
| <i>Astragalus baldshuanicus</i>                       | Vvedensky    | 6205    | NY  | Uzbekistan                                         | 1929 | ceed240f-9a49-4f18-9447-7b918518199e |
| <i>Astragalus baranovii</i>                           | Baranov      | 378     | NY  | Uzbekistan: Tian Shan: Chimgan                     | 1926 | ced7732d-130d-49bb-bd28-0a0af564c012 |
| <i>Astragalus baxoiensis</i>                          | Boufford     | 39460   | HUH | People's Republic of China: Qinghai                | 2007 | ffdefd8c-d9dd-4cf0-88db-4e5674d2e845 |
| <i>Astragalus beckwithii</i>                          | Holmgren     | 16444   | NY  | United States of America: Utah: Box Elder          | 2013 | d5e88c4b-14c3-4c10-8dff-43b44664c731 |
| <i>Astragalus bellus</i>                              | McVaugh      | 24485   | CAS | Mexico: Jalisco                                    | 1970 | 15effd34-c08e-4583-bea8-241b948af8ed |
| <i>Astragalus bergii</i>                              | Hunziker     | 17706   | NY  | Argentina: Cordoba: Punilla                        | 1964 | d24aa630-4f65-4db6-8006-2a3bd7e3954b |
| <i>Astragalus berterii</i>                            | Zoellner     | 4357    | NY  | Chile                                              | 1970 | d24a88e0-2129-4748-bdf2-596ca8188453 |
| <i>Astragalus berterianus</i>                         | Gunckel      | 29710   | OS  | Chile: Santiago: Polpaico                          | 1954 | e4b86421-be62-4543-b31f-00911f891bd2 |
| <i>Astragalus bethlehemiticus</i>                     | Amdursky     | 539     | MO  | Israel                                             | 1954 | 0c848f4c-5732-444c-9bda-d149d526e300 |
| <i>Astragalus bibullatus</i>                          | Orzell       | 9386    | TEX | United States of America: Tennessee: Rutherford    | 1989 | 216819b8-9122-4d4d-a2f0-4055c9ea4eed |

|                                    |             |        |      |                                                      |      |                                          |
|------------------------------------|-------------|--------|------|------------------------------------------------------|------|------------------------------------------|
| <i>Astragalus bicristatus</i>      | Thorne      | 42077  | NY   | United States of America:<br>California: Los Angeles | 1972 | d5e037f5-9d97-4403-ad8b-5cbde60e5b76     |
| <i>Astragalus bidentatus</i>       | Camp        | E-4509 | NY   | Ecuador: Azuay                                       | 1945 | d2481099-10b4-4e2c-941d-<br>ea94069fd919 |
| <i>Astragalus bisulcatus</i>       | Atwood      | 13926  | FLAS | United States of America: Utah:<br>Duchesne          | 1990 | e9d0e1d5-9e3b-47a4-ad06-7b652068b2f1     |
| <i>Astragalus bodinii</i>          | Cody        | 34777  | NY   | Canada: Yukon Territory                              | 1984 | df27da94-2e99-4197-ace5-189a6ecfeb55     |
| <i>Astragalus boeticus</i>         | Lewalle     | 12834  | NA   | NA: NA: NA                                           | NA   | 155e46d5-9c97-465f-9461-c246d3ec42c8     |
| <i>Astragalus bolanderi</i>        | Helmkamp    | 15306  | NY   | United States of America:<br>California: Riverside   | 2009 | d5e37dd9-cdfb-4151-a71c-438b509708a3     |
| <i>Astragalus bornmuellerianus</i> | Kaletkina   | 29     | NY   | Tajikistan                                           | 1966 | ced042b8-ac33-42eb-8652-00e2e61a0773     |
| <i>Astragalus bourgaeanus</i>      | Podlech     | 43151  | MO   | Morocco: Khenifra                                    | NA   | 153b9a7d-038d-46eb-ad11-<br>8d6bdf0b243  |
| <i>Astragalus bourgovii</i>        | Taylor      | 2348   | NY   | Canada: British Columbia                             | 1958 | d5dd237d-bce4-4973-98b0-<br>f1200e00a8bb |
| <i>Astragalus brachycarpus</i>     | Lachashvili | 334    | NY   | Georgia: Dedoplistskaro                              | 2006 | d18a2b27-7ed1-4ddc-9474-<br>a5a92d847453 |
| <i>Astragalus brachylobus</i>      | [Cyrillic]  | 7130   | NY   | Russian Federation                                   | 1961 | d18628ed-9173-4674-a038-<br>8bc33e7223e3 |
| <i>Astragalus brachypus</i>        | Toeosrorof  | s.n.   | NY   | [Cyrillic]                                           | 1963 | cecf6c91-334b-4824-adc8-110680ba2cc9     |
| <i>Astragalus brackenridgei</i>    | Boeke       | 1137   | NY   | Peru: Pasco: Pasco                                   | 1977 | d246d886-be5e-405d-898d-563a5e8f117c     |
| <i>Astragalus brandegei</i>        | Neesw       | 16874  | NY   | United States of America: Utah:<br>Wayne             | 1985 | cc07b4e0-7501-43a9-b71f-27b0a876dd17     |
| <i>Astragalus brauntonii</i>       | Wallace     | s.n.   | NY   | United States of America:<br>California: Los Angeles | 1980 | d5c3d957-992c-48eb-a8ed-<br>91dd341b2062 |
| <i>Astragalus brazoensis</i>       | Lieb        | 296    | NY   | United States of America: Texas:<br>Wilson           | 1983 | d5c1f64e-ad25-4c71-b1eb-030c0d846236     |
| <i>Astragalus brevifolius</i>      | [Cyrillic]  | 2621   | HUH  | Russian Federation: Tuva: Mongun-<br>Tayginsky       | 1981 | ff10b6a8-3d4f-49dc-bd15-6c187182ac86     |
| <i>Astragalus brevipes</i>         | Sytin       | 6531   | NY   | Azerbaijan: Nakhichevan                              | 1982 | cfeebfcb-b0df-4180-9d9c-69d5df605a92     |
| <i>Astragalus breweri</i>          | Liston      | 752-1  | NY   | United States of America:<br>California: Lake        | 1988 | d5bbbc77-1fba-4991-b1c9-9b0928cda52d     |
| <i>Astragalus bucharicus</i>       | [Cyrillic]  | 87     | HUH  | Russian Federation                                   | 1959 | ff10b060-16bb-402f-b143-3dc525bbc4ab     |
| <i>Astragalus buchtormensis</i>    | Bespalova   | 7047   | NY   | Kazakhstan: Karaganda                                | 1959 | cec83870-6dcc-4f03-9871-a2a7ca153018     |
| <i>Astragalus bungeanus</i>        | Lachashvili | 892    | NY   | Georgia: Kvemo Kartli: Gardabani                     | 2007 | d17fbc4f-0cb7-4fb7-9ab0-1cab3ce524ee     |
| <i>Astragalus burkartii</i>        | Ledingham   | 4495   | NY   | Argentina                                            | 1966 | d16fe1bc-3e16-4722-975d-44c7e9193cbb     |

|                                   |                        |          |      |                                                   |      |                                       |
|-----------------------------------|------------------------|----------|------|---------------------------------------------------|------|---------------------------------------|
| <i>Astragalus bustillosii</i>     | Jiles                  |          | NA   | Chile: Coquimbo (IV): Limarv#                     | 1958 | e4b6bc69-e24c-49ab-b7e3-d0e6ebc51176  |
| <i>Astragalus californicus</i>    | Barneby                | 11510    | NY   | United States of America:<br>California: Siskiyou | 1954 | d5b4fa64-a033-4f58-815b-f57530d7649b  |
| <i>Astragalus calliphysa</i>      | Edmondson              | No. 1636 | NY   | Islamic Republic of Iran: Kerman                  | 1977 | ac75a99b-4eb7-4dbe-b356-9c3b9449aeff  |
| <i>Astragalus callistachys</i>    | Ledingham              | 4152     | NY   | Islamic Republic of Iran: Esfahan                 | 1965 | ac6aa448-4435-433e-947f-3711a737602f  |
| <i>Astragalus callithrix</i>      | Neese                  | 8784     | NY   | United States of America: Nevada:<br>Nye          | 1980 | cce88927-e90d-4e7d-ba14-890f74b39e27  |
| <i>Astragalus calycinus</i>       | Tzvelev                | 7131     | NY   | Russian Federation: Dagestan:<br>Levashinskiy     | 1961 | d1806ae7-ea57-4ff8-932f-dee931092d5d  |
| <i>Astragalus calycosus</i>       | Maguire                | 20,840   | NY   | United States of America: Nevada:<br>White Pine   | 1941 | ccdb86c3-8165-4620-a0a2-0bc5c67a6ef3  |
| <i>Astragalus camptoceras</i>     | Wink C. &<br>Fedtch P. | 5b       | NY   | Not shown: Not shown: Not shown                   | 1922 | cec73a6b-4e61-45e1-b1a8-ae335315f59b  |
| <i>Astragalus camptopus</i>       | Smith                  | 12581    | NY   | United States of America: Idaho:<br>Owyhee        | 2015 | ccd4e380-42a1-46cd-beaf-869c672fd6a4  |
| <i>Astragalus campylorhynchus</i> | Grossheim              | 14       | NY   | Azerbaijan: Nakhichevan: Babek                    | 1923 | cce9c09d-4723-405e-b31c-f7f96c293992  |
| <i>Astragalus campylorhynchus</i> | Volk                   | 1650     | NY   | Afghanistan: Vardak                               | 1951 | ac5a69f3-1e85-4a33-a588-25e44848d54f  |
| <i>Astragalus campylosema</i>     | USDA-ARS               | 383603   | NY   | Turkey: Tunceli                                   | 1977 | ac25b3ef-1aaf-4d34-85e0-d8b5d217e301  |
| <i>Astragalus campylotrichus</i>  | Goloskokov             | 4466     | NY   | Kazakhstan                                        | 1963 | cceeffd4-dcb5-4920-9af3-abb658cc35f7  |
| <i>Astragalus canadensis</i>      | Ward                   | s.n.     | FLAS | United States of America: Indiana:<br>White       | 1945 | e9cf4a9f-de21-4fc3-bd05-b2e30f48ba80  |
| <i>Astragalus cancellatus</i>     | Cocrum                 | s.n.     | NY   | [Cyrillic]                                        | 1948 | d17d286c-a7bc-493e-bb1c-f2a85d56665b  |
| <i>Astragalus caprinus</i>        | Boulos                 | 2609     | MO   | Tunisia                                           | 1968 | 1533736e-a9f4-4298-af3b-0dfce55816c0  |
| <i>Astragalus captiosus</i>       | Abdaladze              | 240      | NY   | Georgia: Mtskheta-Mtianeti:<br>Kazbegi            | 2004 | d17911ab-a8e7-46e1-9bd3-052569cee771  |
| <i>Astragalus caraganae</i>       | [Cyrillic]             |          | NY   | Armenia                                           | 1954 | cffc22c0-330f-4578-9fda-19c07f3c66e3  |
| <i>Astragalus carcinus</i>        | McKinnon               | 379      | NY   | United States of America:<br>Washington: Franklin | 1993 | d5b3206a-ffc7-45c6-a209-f8eecebe12e7c |
| <i>Astragalus carminis</i>        | Johnston               | 1137     | NA   | Mexico                                            | 1940 | 157963a8-0a9b-4788-b066-2d85c3268ff5  |
| <i>Astragalus casei</i>           | Arnold Tiehm           | 9369     | TEX  | United States of America: Nevada:<br>Esmeralda    | 1985 | 25cf0444-abd9-47ec-96e5-57e2c64228e9  |
| <i>Astragalus castaneiformis</i>  | Ledingham              | 3230     | NY   | United States of America: Arizona                 | 1962 | ccca8723-26d1-4b3b-9a34-f9ab5ef315fe  |
| <i>Astragalus castetteri</i>      | Todsen                 | s.n.     | NY   | United States of America: New<br>Mexico: Dona Ana | 1975 | ccbdf821-e8f5-4532-8acb-ba475a4cbe29  |
| <i>Astragalus catabostrychos</i>  | Podlech                | 31007    | NY   | Afghanistan: Balkh                                | 1978 | abe9375c-b48d-4d8d-b171-89f5d4808856  |

|                                    |               |       |      |                                               |      |                                      |
|------------------------------------|---------------|-------|------|-----------------------------------------------|------|--------------------------------------|
| <i>Astragalus caucasicus</i>       | Iashagashvili | 43    | MO   | Georgia: East Georgia                         | 2002 | 0c7c3116-b0e9-47be-b51e-a3d37f35e226 |
| <i>Astragalus centralis</i>        | Botschgantzev | 6208  | HUH  | Russian Federation                            | 1937 | 000a7723-ee3-4e7b-82bb-d3fd4e3127ac  |
| <i>Astragalus cephalanthus</i>     | Assadi        | 1672  | NY   | Islamic Republic of Iran                      | 1977 | abe4a123-aa5d-42fb-ac06-eeb9b62f9933 |
| <i>Astragalus cephalotes</i>       | Litvinov      | s.n.  | MO   | Turkey: Kars                                  | 1914 | 0c61a0c6-210a-4c91-b1b7-47cd7fecf15a |
| <i>Astragalus ceramicus</i>        | Atwood        | 15436 | FLAS | United States of America: Utah: Beaver        | 1991 | e9caf60a-10c3-42a1-9086-da53cb00aae3 |
| <i>Astragalus cerasinus</i>        | O'Kane        | 2502  | NY   | United States of America: Colorado: Conejos   | 1986 | d593f077-83d0-4690-a1b2-b2d7ab216727 |
| <i>Astragalus cerasocrenus</i>     | Kurbanov      | 306   | MO   | Turkmenistan: Ahal                            | 2001 | 0c739979-ab4c-4198-98ca-5b1762d30efb |
| <i>Astragalus chamaeleuce</i>      | Huber         | 5384  | NY   | United States of America: Utah: Duchesne      | 2014 | d57e7f71-d363-4399-847d-5b666ce1c882 |
| <i>Astragalus chamaemeniscus</i>   | Reveal        | 2328  | NY   | United States of America: Wyoming: Carbon     | 1971 | ccb86491-1ed5-4a48-b737-0da9279c76e0 |
| <i>Astragalus chamissonis</i>      | Marticorena   | 969   | NA   | Chile: Maule (VII)                            | 1967 | e4b4e4c7-0ea4-410f-9b1d-d1ebb0008aa0 |
| <i>Astragalus chilienshanensis</i> | Boufford      | 35652 | HUH  | People's Republic of China: Sichuan: Yajiang  | 2006 | ffffe391-d600-4adc-9cb6-82fe307e550d |
| <i>Astragalus chinensis</i>        | Ledingham     | 4815  | NY   | Canada: Saskatchewan                          | 1966 | d69fcd47-70ed-4e11-afac-42a70d9ac6ff |
| <i>Astragalus chloodes</i>         | Goodrich      | 27501 | NY   | United States of America: Utah: Uintah        | 2009 | d697a3b7-d2f1-4095-b863-9c6f40edba0a |
| <i>Astragalus chlorostachys</i>    | Barneby       | s.n.  | NY   | Czechoslovakia: Pruhonice: [cultivated]       | 1972 | aa3c12e0-adf5-48b8-956a-b98532fa76a4 |
| <i>Astragalus chorizanthus</i>     | Volk          | 1716  | NY   | Afghanistan: Kabul                            | 1951 | ce214c4f-6e3a-4858-8b56-8fdab9dfa16f |
| <i>Astragalus chrysomallus</i>     | Butkov        | 6258  | HUH  | Uzbekistan                                    | 1931 | fff5249e-723e-4a52-8158-5e3b96b10f4d |
| <i>Astragalus chrysostachys</i>    | Lamond        | 4466  | NY   | Islamic Republic of Iran: Kordestan: Sanandaj | 1971 | cff72ae3-ea8f-4233-9e84-75a555e809cb |
| <i>Astragalus chubutensis</i>      | Donat         | 178   | NY   | Argentina: Santa Cruz: Caleta Olivia          | 1929 | d1635734-62b4-4a5f-b9c4-52cdf46e99b6 |
| <i>Astragalus chuskanus</i>        | Rink          | 11409 | NY   | United States of America: Arizona: Apache     | 2012 | ccb170f5-227e-455d-bcfa-92e19e1989ac |
| <i>Astragalus cibarius</i>         | Lesica        | 5359  | NY   | United States of America: Montana: Carbon     | 1991 | ccad2b2c-31ac-4cc6-b852-b15479ebb9a1 |
| <i>Astragalus cicer</i>            | Ashley N.     | 15-77 | NY   | United States of America: Utah: Sanpete       | 1915 | d694a0c5-02fc-454c-b2cb-fde3e6022818 |
| <i>Astragalus cimae</i>            | Holmgren      | 8167  | NY   | United States of America: Nevada: Nye         | 1976 | d68d35fa-9e03-4dc0-9e32-2ab90963add3 |
| <i>Astragalus circumdatus</i>      | Wiggins       | 21461 | CAS  | Mexico: Baja California                       | 1971 | 1633b009-2bf5-4327-926d-15327eda5aa8 |

|                                    |             |        |      |                                                    |        |                                      |
|------------------------------------|-------------|--------|------|----------------------------------------------------|--------|--------------------------------------|
| <i>Astragalus citrinus</i>         | [Cyrillic]  | 6203   | HUH  | Turkmenistan                                       | 1931   | 0015709b-0007-4836-81cb-1b1faf84f309 |
| <i>Astragalus clarianus</i>        | Barneby     | 11238  | NY   | United States of America:<br>California: Sonoma    | 1954   | d683f828-e577-4386-bf67-ef0b4a0f2020 |
| <i>Astragalus clevelandii</i>      | Spellenberg | 3739   | NY   | United States of America:<br>California: Napa      | 1974   | d67c3599-4fb5-4d43-bd1f-0579665b3eac |
| <i>Astragalus clusii</i>           | Borja       | s.n.   | NY   | Spain: Toledo                                      | 1965   | d20c8c0b-b095-43fb-a89a-134101cbbca0 |
| <i>Astragalus coahuilae</i>        | Ripley      | 13513  | CAS  | Mexico: Coahuila                                   | 1963   | 1572a2de-80b1-4198-82c6-28698d0e126f |
| <i>Astragalus cobrensis</i>        | Keil        | 4475   | NY   | United States of America: Arizona:<br>Gila         | 1969   | cc996174-ba96-4dcd-b097-3465f2fea300 |
| <i>Astragalus coccineus</i>        | Walker      | 1414   | NY   | United States of America:<br>California: Riverside | 1995   | cc98799e-d99f-4b64-ac1f-a0037d91760d |
| <i>Astragalus cochabambensis</i>   | Dillon      | 5060   | NY   | Chile: Antofagasta: Antofagasta                    | 1987   | d29e4ec9-2471-4b38-ad5e-c0bc16e5b9b0 |
| <i>Astragalus cognatus</i>         | Goloskokov  | 5770   | NY   | Kazakhstan                                         | 1971   | cff36c85-e87a-4a03-8106-44c7649becde |
| <i>Astragalus collinus</i>         | Gray        | 5357   | NY   | United States of America: Idaho:<br>Nez Perce      | 2006   | cc94a1bb-8e04-46e1-9fe5-9c47bbf3835d |
| <i>Astragalus coltonii</i>         | O'Kane      | 2348   | NY   | United States of America:<br>Colorado: Montezuma   | 1986   | cc9475d8-02c6-4d59-b4eb-a8fe6aa6e442 |
| <i>Astragalus columbianus</i>      | Joyal       | 480    | NY   | United States of America:<br>Washington: Benton    | 1984   | d67913a6-3e4b-43f5-a10b-a80a1625aa23 |
| <i>Astragalus coluteocarpus</i>    | [Cyrillic]  | 1158   | HUH  | [Cyrillic]                                         | 1965   | ffea8400-5a7a-42ca-b79c-24f8288da752 |
| <i>Astragalus comosus</i>          | USDA-ARS    | 384742 | NY   | Islamic Republic of Iran                           | 1977   | aa314714-9dc5-45ba-8e1b-8f2af46c5c31 |
| <i>Astragalus confertus</i>        | Ho          | 1419   | HUH  | People's Republic of China:<br>Qinghai             | 1993   | ffd4d3ff-31a8-4acd-a374-fb87e1e29c09 |
| <i>Astragalus congdonii</i>        | Howell      | 40516  | NY   | United States of America:<br>California: Mariposa  | 1964   | d66c1e4f-956a-445d-aae1-1566272def68 |
| <i>Astragalus conjunctus</i>       | Halse       | 6350   | NY   | United States of America: Oregon:<br>Wheeler       | 2003   | cc8dba0a-47aa-4d0b-bc6b-a95da5c81c88 |
| <i>Astragalus consanguineus</i>    | Schrenk     | s.n.   | NY   | Kazakhstan [Songarei]                              | [None] | d20a6a6d-3701-4ac3-bc3e-3d0997a1aa96 |
| <i>Astragalus consobrinus</i>      | Franklin    | 6141   | NY   | United States of America: Utah:<br>Wayne           | 1988   | d6657434-04b8-4bbf-a8e0-36d8bbb1373b |
| <i>Astragalus contortuplicatus</i> | Klinkova    | s.n.   | NY   | Kazakhstan: West Kazakhstan:<br>Bokey Orda         | 1993   | d0ab6c7c-393e-4f97-898f-038103f3522e |
| <i>Astragalus convallarius</i>     | Rogers      | 652    | FLAS | United States of America:<br>Washington: Ferry     | 1940   | e9c56c49-ee98-452e-b246-54df6fc2d9b8 |
| <i>Astragalus coquimbensis</i>     | Munoz       | s.n.   | NA   | Chile: Atacama (III): Cha <sup>v</sup> ±aral       | 1991   | e4b125bd-2f45-4df3-9b1f-86098bc88562 |
| <i>Astragalus cornutus</i>         | Gagnidze    | 1026   | NY   | Georgia                                            | 2004   | d0bc3785-7b7c-460a-92e3-f1174e10c587 |

|                                 |              |        |      |                                                      |      |                                      |
|---------------------------------|--------------|--------|------|------------------------------------------------------|------|--------------------------------------|
| <i>Astragalus corrugatus</i>    | Thomas       | 2005   | NA   | Algeria                                              | 1983 | 153045b4-3607-47aa-ad62-f3c131afd643 |
| <i>Astragalus cottonianus</i>   | Botschantzev | 6260   | HUH  | Uzbekistan: Surxondaryo                              | 1930 | ff36fb0f-5ac1-4449-8b6c-df4545d78e1d |
| <i>Astragalus cracca</i>        | Lopez M.     | 7610   | NY   | Peru: Recuay                                         | 1970 | d29928c8-7289-4f94-8554-facdab47053a |
| <i>Astragalus crassicaarpus</i> | Carter       | 2171   | FLAS | United States of America: Iowa: Osceola              | 1957 | e9cd683e-6cde-47c7-b868-368d7dfd7455 |
| <i>Astragalus cremnophylax</i>  | Brian        | 95-168 | NY   | United States of America: Arizona: Coconino          | 1995 | d66311da-acc1-45ec-91fc-d7d618ec0f9f |
| <i>Astragalus crenatus</i>      | Podlech      | 50839  | MO   | Morocco: Er Rachidia                                 | 1993 | 1532412e-cc64-4caf-9d2a-1e44df1f29d1 |
| <i>Astragalus cretaceus</i>     | Samuelsson   | 2714   | NY   | Palestine, State of                                  | 1933 | aa294139-4d6c-4493-903c-26ff06dc6881 |
| <i>Astragalus creticus</i>      | Lambert      | 591    | NY   | Turkey                                               | 1968 | aa2a478e-1dc3-407a-9d28-e163741bdbdf |
| <i>Astragalus cronquistii</i>   | Barneby      | 17803  | NY   | United States of America: Colorado                   | 1982 | cc8c0252-4bac-4c6e-8b9e-e55d2a38542f |
| <i>Astragalus crotalariae</i>   | Sphon        | 254    | FLAS | United States of America: California: Imperial       | 1959 | e9bb7aff-fcb6-4270-9e66-427685a1bc69 |
| <i>Astragalus cruckshanksii</i> | Kiesling     | 8115   | OS   | Argentina: San Juan: Calingasta                      | 1992 | e4a6cb79-f189-446a-9c36-5ca7673e24c7 |
| <i>Astragalus crymophilus</i>   | Shapiro      |        | NY   | Argentina                                            | 1986 | d29096a7-77a9-4441-8773-9212d76b4f63 |
| <i>Astragalus cryptanthus</i>   | Ricardi      | 231    | NA   | Chile                                                | 1961 | e49285b5-4e7b-4a8a-98ec-b394008318e3 |
| <i>Astragalus cryptobotrys</i>  | Ricardi      |        | NA   | ChileParinacota                                      | 1961 | e4904d58-d2b3-4a12-a31c-359574e1c25d |
| <i>Astragalus curtipes</i>      | Cassen       | 798    | FLAS | United States of America: California: San Bernardino | 1974 | e9b7ad8b-0e60-4e82-98e3-7ac37f0d8af0 |
| <i>Astragalus curvicarpus</i>   | Isely        | 10069  | NY   | United States of America: Oregon: Deschutes          | 1966 | d662c421-970c-4474-a9fe-b05dcf07f0f1 |
| <i>Astragalus curvicaulis</i>   | Ellenberg    | 4650   | NY   | Chile: Valparaiso                                    | 1971 | d2904729-d4fd-45f0-90a2-618b54731792 |
| <i>Astragalus curviflorus</i>   | Ledingham    | 4132   | NY   | Islamic Republic of Iran                             | 1965 | abb94793-de88-4fc4-8bf3-b7007f151b39 |
| <i>Astragalus curvirostris</i>  | USDA-ARS     | 380710 | NY   | Islamic Republic of Iran: Fars: Shiraz               | 1977 | abb0eb5e-a4f2-4643-9988-79da5f73b7e2 |
| <i>Astragalus cusickii</i>      | Bala         | 11-71a | NY   | United States of America: Idaho: Adams               | 2011 | cc8b5edb-192e-4efc-91b2-ff7e1fc4b81a |
| <i>Astragalus cyaneus</i>       | Higgins      | 5163   | NY   | United States of America: New Mexico: Santa Fe       | 1972 | cc84a95a-8da9-4c49-aa7a-c54dd5e4248f |
| <i>Astragalus cymboides</i>     | Holmgren     | 9107   | NY   | United States of America: Utah: Emery                | 1979 | cc8445ce-3121-4a43-a6b2-2079055182a5 |
| <i>Astragalus cyri</i>          | Lachashvili  | 31     | NY   | Georgia: Kartli: Mtskheta                            | 2005 | d0bf5322-395b-401f-bb28-517145f74a9a |

|                                                                     |            |             |      |                                                  |      |                                          |
|---------------------------------------------------------------------|------------|-------------|------|--------------------------------------------------|------|------------------------------------------|
| <i>Astragalus dactylocarpus</i><br>( <i>Astragalus spinescens</i> ) | [Cyrillic] | [Illegible] | NY   | Turkmenistan                                     | 1978 | acf192aa-4c52-4d61-b7a2-94243dfb438c     |
| <i>Astragalus dactylocarpus</i>                                     | Volk       | 2906        | NY   | Afghanistan: Helmand                             | 1953 | abab945f-c513-4903-95f0-5a584e8147a5     |
| <i>Astragalus dahuricus</i>                                         | Hu SY      | 19730       | HUH  | Mongolia                                         | 1984 | fadace43-65ab-4303-9c15-6ec9905ccf71     |
| <i>Astragalus daleae</i>                                            | Breedlove  | 63018       | NA   | Mexico: Durango                                  | 1986 | 15726290-bdda-43b1-b96b-aff11ddc8f87     |
| <i>Astragalus danicus</i>                                           | Jacobsen   | 278         | NY   | Denmark: Zealand                                 | 1970 | d0c92fe7-333a-47b0-b710-e4a0283b21bf     |
| <i>Astragalus darumbium</i>                                         | Jiles      | 4107        | NA   | Chile                                            | 1962 | e4714581-cf1c-4886-ad98-d29857a61565     |
| <i>Astragalus dasyanthus</i>                                        | Akinfiev   | 7244        | NY   | Ukraine: Dnipropetrovsk                          | 1906 | d0cda681-47a0-4cda-bd87-c000c6ca5d31     |
| <i>Astragalus debequaeus</i>                                        | Nelson     | 79077       | NY   | United States of America:<br>Colorado: Mesa      | 2010 | d65f9c07-3457-47ed-9eef-c426a38aad6f     |
| <i>Astragalus densifolius</i>                                       | Orhan      | 1186        | MO   | Turkey: Ankara: Kazan                            | 1993 | 0c1317c2-1b5c-4dfc-87ec-1cd503202fef     |
| <i>Astragalus denudatus</i>                                         | Karjagin   | s.n.        | NY   | Azerbaijan: Shabran                              | 1937 | b1012b6b-eb41-4d39-839b-<br>5e9f32333820 |
| <i>Astragalus depressus</i>                                         | Stephani   | s.n.        | NY   | Italy: Abruzzo: L'Aquila                         | 1927 | d17561d2-fac7-4b5f-919e-b91ec9ebccfc     |
| <i>Astragalus desereticus</i>                                       | Neese      | 10391       | NY   | United States of America: Utah:<br>Utah          | 1981 | d65f8edf-a741-4baa-bfb0-e96217a8297d     |
| <i>Astragalus desperatus</i>                                        | Atwood     | 15021       | FLAS | United States of America: Utah:<br>Garfield      | 1991 | e95ff422-ad88-4038-afeb-e8d0b22dec36     |
| <i>Astragalus deterior</i>                                          | Welsh      | 2131        | NY   | United States of America:<br>Colorado: Montezuma | 1963 | cc82d713-452a-486b-98bb-fcc6db9bbdd4     |
| <i>Astragalus detritalis</i>                                        | Huber      | 5067        | NY   | United States of America: Utah:<br>Duchesne      | 2011 | cc7da259-102b-41a8-bb93-35eff828e4f0     |
| <i>Astragalus dianthus</i>                                          | Vvedensky  | 6           | NY   | Uzbekistan                                       | 1922 | ccf0cf4e-b85d-4be6-a31f-70dbd511682b     |
| <i>Astragalus diaphanus</i>                                         | Wright     | 1686        | NY   | United States of America: Oregon:<br>Grant       | 1983 | cc7ada49-42ac-4d67-8728-178e594d0eb9     |
| <i>Astragalus dictyolobus</i>                                       | Lamond     | 3642        | NY   | Islamic Republic of Iran:<br>Azerbaijan          | 1971 | ccf3aa90-ecd6-44c5-9959-3ce2609131d2     |
| <i>Astragalus didymocarpus</i>                                      | Schramm    | 1784        | NY   | United States of America:<br>California: Inyo    | 1978 | d655f50b-16a0-40d0-bb4f-3c9841b561ac     |
| <i>Astragalus dilutus</i>                                           | Schischkin | 3137        | HUH  | Russian Federation: Oirotia: Altai               | 1931 | fad05c65-c8af-4433-b58c-db6bcb3d80f0     |
| <i>Astragalus diminutivus</i>                                       | Deginani   | 520         | NY   | Argentina: Jujuy: Cochinoca                      | 1995 | d28aa9f3-fc66-4a7e-b493-c7e9d2064a59     |
| <i>Astragalus dipelta</i>                                           | Mokeeva    | 383         | NY   | Unknown Country                                  | 1928 | cd0c526b-f998-46a3-a742-bac91e255458     |
| <i>Astragalus diphacus</i>                                          | Yen        | 15646       | NY   | Mexico: Nuevo Leon: Galeana                      | 2015 | d3f94d5d-52c3-44f8-9b55-2e8031f46d44     |
| <i>Astragalus diphtherites</i>                                      | Rechinger  | 11548       | MO   | Iraq: Dihok: Dohuk                               | 1957 | 0c18db31-c02d-4f4b-8d29-f65f32a94717     |

|                                                   |             |        |      |                                               |      |                                      |
|---------------------------------------------------|-------------|--------|------|-----------------------------------------------|------|--------------------------------------|
| <i>Astragalus discolor</i>                        | Hu          | 19700  | HUH  | Mongolia                                      | 1984 | fab91016-5bab-41c4-8e95-1002e5874eed |
| <i>Astragalus distentus</i>                       | Burkart     | 5661   | NY   | Argentina: Buenos Aires: Campana              | 1933 | d3f8097f-02e2-47cb-a023-9fc71da04622 |
| <i>Astragalus distortus</i>                       | Redfearn Jr | 9815   | FLAS | United States of America: Missouri: Greene    | 1962 | e96cb642-09c5-475c-bb1a-703089a28fe7 |
| <i>Astragalus diversifolius</i>                   | Caicco      | 385    | NY   | United States of America: Idaho: Custer       | 1982 | d64f0fc2-5331-4c74-aa13-4040ae17c3fe |
| <i>Astragalus dodtii</i>                          | Munoz       | s.n.   | OS   | Chile: Atacama (III): Copiapu <sup>v</sup> ≥  | 1991 | e48f77ab-a79c-4ba4-9d1e-1b79ef6a56e8 |
| <i>Astragalus dolichocarpus</i>                   | Granitov    | 355    | NY   | Uzbekistan?                                   | 1926 | cd1ee8aa-b6d7-4837-99f5-e1df20d7b5db |
| <i>Astragalus dolichophyllus</i>                  | Klinkova    | s.n.   | NY   | Russian Federation: Astrakhan: Akhtubinsky    | 1990 | d1faca8c-0e5f-42c7-9560-36ca65162fc8 |
| <i>Astragalus douglasii</i>                       | NA          | NA     | NA   | Mexico: Baja California: Ensenada             | 1961 | 1622ccca-0c25-4463-8e43-6e702877f846 |
| <i>Astragalus drabelliformis</i>                  | Holmgren    | 8374   | NY   | United States of America: Wyoming: Sublette   | 1977 | cc72ef86-77cd-4c59-b771-34eacf55385c |
| <i>Astragalus drummondii</i>                      | Foster      | 10430  | FLAS | United States of America: Wyoming: Carbon     | 1991 | e9626080-c4ec-4d0c-b8eb-ea8e20074f76 |
| <i>Astragalus duchesnensis</i>                    | Goodrich    | 27952  | NY   | United States of America: Utah: Uintah        | 2011 | cc6ed3a2-2cad-463f-919c-64ed13d33758 |
| <i>Astragalus echanensis</i>                      | Dieterle    | 1245   | NY   | Afghanistan: Bamyan                           | 1971 | aba4d335-9fcb-426e-bc83-fa478a676da8 |
| <i>Astragalus e</i> People's Republic of Chinatus | Podlech     | 43613  | MO   | Morocco: Kenitra                              | 1987 | 151c4c7f-0014-40d9-adb0-b2670a28b264 |
| <i>Astragalus echinops</i>                        | Assadi      | 2102   | NY   | Islamic Republic of Iran: Kerman: Jiroft      | 1977 | aba10a32-c891-4fe2-8be2-8334b4544247 |
| <i>Astragalus edmondstonei</i>                    | Gunckel     | 39476  | NA   | Chile: Valparaiso (V): Valparaiso             | 1956 | e485ab4d-9494-4d98-9fb1-16ba17d249c3 |
| <i>Astragalus edulis</i>                          | Davis       | 48892  | NY   | Morocco: Souss-Massa: Taroudannt              | 1969 | d05bdb12-bc68-4b95-a215-d85e7c1efca0 |
| <i>Astragalus egglestonii</i>                     | Spellenberg | 10871  | NY   | United States of America: New Mexico: Socorro | 1991 | d649e8ad-d76c-4369-827a-7c9514344688 |
| <i>Astragalus ellipsoideus</i>                    | Goloskokov  | 4326   | NY   | Kazakhstan                                    | 1959 | cf315c3-5b04-494d-9c88-46c472175fde  |
| <i>Astragalus elymaiticus</i>                     | Ledingham   | 4068   | NY   | Islamic Republic of Iran: Fars: Shiraz        | 1965 | aba34fe2-d097-4cc5-b619-89ebef3e6b89 |
| <i>Astragalus emarginatus</i>                     | Liston      | 496/10 | MO   | Israel: HaZafon: Golan                        | 1986 | 0c67de25-81e3-4d7e-b15a-b69a83f99a3c |
| <i>Astragalus emoryanus</i>                       | Johnston    | 10207  | CAS  | Mexico: Nuevo Le <sup>v</sup> ≥n              | 1973 | 161d0726-efd8-4fc4-b63d-6ea755ed4175 |
| <i>Astragalus endopterus</i>                      | Demaree     | 44420  | NY   | United States of America: Arizona: Coconino   | 1961 | cc59189d-ee7b-471e-9416-416a7fcfd01  |
| <i>Astragalus ensiformis</i>                      | Coombs      | 2440   | NY   | United States of America: Arizona: Mohave     | 1978 | cc5662f3-ef6f-4c83-900b-062c9141dbd2 |



|                                                     |               |        |      |                                                |        |                                      |
|-----------------------------------------------------|---------------|--------|------|------------------------------------------------|--------|--------------------------------------|
| <i>Astragalus episcopus</i>                         | Hufford       | 1843   | NY   | United States of America: Utah: Emery          | 1997   | d7403ed3-fed1-4e87-a9ca-d6f06d0cab1e |
| <i>Astragalus episcopus (Astragalus lancearius)</i> | Welsh         | 28054  | NY   | United States of America: Utah: Kane           | 2001   | cb9992b2-9936-47c9-adbc-296d01cd8d58 |
| <i>Astragalus eremiticus</i>                        | Ben Franklin  | 7029   | FLAS | United States of America: Utah: Washington     | 1990   | e95531a2-bd0a-4dc8-a228-6051daea3101 |
| <i>Astragalus eremophilus</i>                       | Adam          | 13280  | MO   | Mauritania: Atar                               | 1957   | 157d0c99-f083-419b-952e-4a646d16b713 |
| <i>Astragalus eriocarpus</i>                        | Szoviks       | s.n.   | NY   | Armenia                                        | [None] | b0f66b2e-11c6-4132-972c-9c90c359f9fb |
| <i>Astragalus eriopodus</i>                         | [Cyrillic]    |        | NY   | [Cyrillic]                                     | 1956   | cfc9b8b4-3f22-477f-8d77-24a8372cbb92 |
| <i>Astragalus ernestii</i>                          | D.E. Boufford | 39960  | HUH  | People's Republic of China: Sichuan            | 2007   | fa758999-c557-4732-a0e9-b9dfe9b4ca1a |
| <i>Astragalus ervoides</i>                          | NA            | NA     | NA   | Mexico: Sinaloa: Concordia                     | 1983   | 167d1234-4119-4e84-a737-85af125d4178 |
| <i>Astragalus erythrosemius</i>                     | Volk          | 71/38  | HUH  | Afghanistan: Paktia                            | 1971   | f80a227e-ed97-4a1c-abf6-da72ec3f12da |
| <i>Astragalus eucosmus</i>                          | Dutilly       | 39,425 | NY   | Canada: Quebec                                 | 1961   | cc4f5cb7-86db-45a0-ba61-dffd44c43135 |
| <i>Astragalus eurekensis</i>                        | Welsh         | 1970   | NY   | United States of America: Utah: Wasatch        | 1963   | d72ecbec-eb68-4f48-a367-035ddb2c7ec3 |
| <i>Astragalus eurylobus</i>                         | Nichols       | 434    | NY   | United States of America: Nevada: Lincoln      | 1985   | cc4ac8c1-b4d3-4b62-8c92-ed6c09fbbdb4 |
| <i>Astragalus exscapus</i>                          | Lewalle       | 12381  | MO   | Morocco                                        | 1989   | 154ec09b-1aed-470f-96c3-72d9efdb86ad |
| <i>Astragalus fabaceus</i>                          | Lachashvili   | 384    | NY   | Georgia: Kakheti: Dedoplistkaro                | 2006   | d1f7025a-c0e1-49bb-ad40-d0792490160b |
| <i>Astragalus falcatus</i>                          | Weber         | 15359  | NY   | United States of America: Colorado: Boulder    | 1978   | d73c5799-8bd0-472e-ac68-72930aa6ac6a |
| <i>Astragalus falconeri</i>                         | Webster       | 5929   | HUH  | Pakistan: Baltistan                            | 1955   | f7f48647-7188-47f3-8ca0-1deeda4ce040 |
| <i>Astragalus farctissimus</i>                      | Butkov        | 6212   | HUH  | Uzbekistan                                     | 1931   | fa60b678-e9fd-45db-a3d4-80821bf4ee5a |
| <i>Astragalus fasciculifolius</i>                   | Ledingham     | 4123   | NY   | Islamic Republic of Iran: Shiraz               | 1966   | aa20932b-56f1-4180-8cf8-a08de705f68f |
| <i>Astragalus fastidius</i>                         | Breedlove     | 72822  | CAS  | Mexico: Baja California                        | 1993   | 16790db1-b51a-4bce-84b2-421419b8d634 |
| <i>Astragalus fedtschenkoanus</i>                   | Skvortsov     | s.n.   | HUH  | Kazakhstan                                     | 1965   | fa4f5d06-b2e0-42ac-8551-0a881246ff42 |
| <i>Astragalus feensis</i>                           | Barneby       | 17949  | NY   | United States of America: New Mexico: Santa Fe | 1983   | d71118e5-5642-4d3a-92b8-0d261f3bdf8a |
| <i>Astragalus filicaulis (Astragalus rutilobus)</i> | Goloskokov    | 4472   | NY   | Kazakhstan                                     | 1937   | b0274a7e-f050-44be-9556-a9208a6e1877 |
| <i>Astragalus filicaulis</i>                        | Podlech       | 30206  | NY   | Afghanistan: Takhar: Farkhar                   | 1977   | aa19ecab-227f-4849-b777-f0801e464fd9 |

|                                                  |                    |         |      |                                                             |      |                                      |
|--------------------------------------------------|--------------------|---------|------|-------------------------------------------------------------|------|--------------------------------------|
| <i>Astragalus filipes</i>                        | Moran              | 28914   | FLAS | Mexico: Baja California                                     | 1980 | e94949f8-c697-4526-bcfc-6fdd4868a4c9 |
| <i>Astragalus flavus</i>                         | Foster             | 10415   | FLAS | United States of America:<br>Wyoming: Uinta                 | 1991 | e942cc23-dae2-45b5-8278-030909575238 |
| <i>Astragalus flexilipes</i>                     | Ledingham          | 4261    | NY   | Islamic Republic of Iran                                    | 1965 | aa14b66b-91a5-4647-aa56-159db76c4437 |
| <i>Astragalus flexuosus</i>                      | Atwood             | 29690   | NY   | United States of America:<br>Colorado: Chaffee              | 2003 | cc44afdf-d8ca-46b0-867c-d91d7631ac80 |
| <i>Astragalus floridus</i>                       | Boufford           | 29979   | NY   | People's Republic of China: Xizang<br>(Tibet)               | 2000 | cea8a748-14f7-4238-8483-33f337ecf7e2 |
| <i>Astragalus follicularis</i>                   | Cronquist          | 12119   | NY   | Russian Federation: Gorno-Altaysk                           | 1988 | cd56e556-9ef2-49c3-94cc-9c9433da8dd9 |
| <i>Astragalus forrestii</i>                      | Boufford           | 28682   | HUH  | People's Republic of China:<br>Sichuan: Garz <sup>√</sup> ™ | 1998 | fa2ce01f-bd8c-457b-a5e5-fd6d3e369d2b |
| <i>Astragalus fraxinifolius</i>                  | USDA-ARS           | 383604  | NY   | Turkey: Dagyolo                                             | 1977 | aa07629f-6fb9-4acf-ae4f-c098f1db3501 |
| <i>Astragalus frickii</i>                        | Atha               | 5875    | NY   | Georgia: Adigeni                                            | 2007 | d1fe2345-e06e-4ae8-8556-4c72d18287e5 |
| <i>Astragalus frigidus</i>                       | Delannay           | 1195    | MO   | Switzerland: Graubunden: Albula                             | 1973 | 09c4b1db-d19c-42ff-b505-f9dd9c53a89e |
| <i>Astragalus frigidus</i>                       | Gage               | SG 2426 | NY   | Russian Federation                                          | 1996 | d1ec075d-d37e-4651-afbe-aa74faa35ba4 |
| <i>Astragalus frigidus (Astragalus secundus)</i> | Webster            | 6047    | HUH  | India                                                       | 1955 | f7a96c9a-208b-44eb-9c63-0307df3960fe |
| <i>Astragalus froedinii</i>                      | Jahandiez          | 235     | NY   | Morocco: Grand Atlas                                        | 1931 | d04be173-87e7-4518-a645-39a104775a94 |
| <i>Astragalus fruticosus</i>                     | Ikonnikov-Galitzky | 2416    | HUH  | Mongolia                                                    | 1929 | feb58bbb-fe77-40ae-b385-1b183bf99794 |
| <i>Astragalus fucatus</i>                        | Atwood             | 21743   | NY   | United States of America: Utah:<br>San Juan                 | 1997 | cc31aa5f-3b8d-4ae5-8a1c-67a5b69326d2 |
| <i>Astragalus funereus</i>                       | Cochrane           | 372     | NY   | United States of America: Nevada:<br>Nye                    | 1977 | d72d6ea9-c7a5-401b-8460-d4576fefa456 |
| <i>Astragalus galegiformis</i>                   | Atha               | 3704    | NY   | Georgia                                                     | 2003 | cf2262c2-99f6-48e2-87eb-9716d00bbe8a |
| <i>Astragalus gambelianus</i>                    | Jamaes             | 1739    | NY   | United States of America:<br>California: Marin              | 1946 | cb826c61-1395-46eb-9c19-5cb379544230 |
| <i>Astragalus garbancillo</i>                    | Anderson           | 12347   | NA   | Argentina: Jujuy: Humahuaca                                 | 1982 | 16703338-ed70-4776-87a7-7357a24bcf04 |
| <i>Astragalus geminiflorus</i>                   | Peredes            | 4579    | NY   | Ecuador: Quito                                              | 1966 | d1613cb0-6efb-4a8a-94fe-043dc9db22ce |
| <i>Astragalus geniculatus</i>                    | Jahandiez          | 276     | NY   | Morocco: F <sup>√</sup> @s-Mekn <sup>√</sup> @s: Taza       | 1929 | d045bc91-02f9-4a39-a4d3-64f179d0090d |
| <i>Astragalus gentryi</i>                        | Van Devender       | 95-380  | TEX  | Mexico: Sonora: Y <sup>√</sup> @cora                        | 1995 | 2109def2-3589-4ce4-a2f7-14e5e42815d3 |
| <i>Astragalus georgii</i>                        | [Cyrillic]         | 1364    | NY   | Kazakhstan: Turkistan                                       | 1977 | cd317342-0d05-4329-a851-fafc1a12edab |

|                                                     |             |         |     |                                                                           |      |                                      |
|-----------------------------------------------------|-------------|---------|-----|---------------------------------------------------------------------------|------|--------------------------------------|
| <i>Astragalus geyeri</i>                            | Smith       | 12528   | NY  | United States of America: Idaho: Owyhee                                   | 2015 | d70d4e4b-abdc-4d25-8e93-cf3cfc35c030 |
| <i>Astragalus giganteus</i>                         | Lebgue      | 3526    | CAS | Mexico: Chihuahua: Gomez Farias                                           | 1994 | 1602aae2-df0e-4108-9bc5-9a8133722131 |
| <i>Astragalus gilensis</i>                          | Landrum     | 5253    | NY  | United States of America: Arizona: Apache                                 | 1986 | cb7f0c6e-3a75-4498-8138-f68f6ed1e941 |
| <i>Astragalus gilmanii</i>                          | Marrs-Smith | s.n.    | NY  | United States of America: Nevada: Lincoln                                 | 1985 | d70858c5-b4aa-4e47-bc55-c423eb735ea8 |
| <i>Astragalus glabrescens</i>                       | [Cyrillic]  | 1027    | NY  | [Cyrillic]                                                                | 1960 | ceb5935a-e24c-4973-8732-7d978d17b2f7 |
| <i>Astragalus glaux</i>                             | Castroviejo | FC 5422 | MO  | Morocco: Tetouan                                                          | 1981 | 153f0f1e-8613-4f04-afd7-6f7087855d1f |
| <i>Astragalus globiceps</i>                         | Butkov      | 6256    | NY  | Turkmenistan: Mary: Serhetabat                                            | 1930 | cf12ba7e-8d4f-4529-a782-dfb7d0f0be01 |
| <i>Astragalus globiceps (Astragalus agameticus)</i> | Cuba        | s.n.    | NY  | Russian Federation [Checheno-Ingush Autonomous Soviet Socialist Republic] | 1990 | ab9a2fd3-3d78-41fc-a573-c24a159c627a |
| <i>Astragalus glumaceus</i>                         | Ledingham   | 4230    | NY  | Islamic Republic of Iran: Kordestan: Sanandaj                             | 1965 | ab996d0d-10ca-443d-8574-a977a2d21f75 |
| <i>Astragalus glycyphylloides</i>                   | Karjagin    | s.n.    | NY  | Azerbaijan                                                                | 1937 | cf2970ec-df7d-4af3-8534-f3542b76cf47 |
| <i>Astragalus glycyphyllos</i>                      | USDA-ARS    | 234686  | NY  | Denmark: Zealand: Kulhuse                                                 | 1971 | cb7e9efe-6c19-418f-ad9d-eb032fe918c2 |
| <i>Astragalus goktschaicus</i>                      | Sytin       | 6532    | NY  | Armenia: Gegharkunik                                                      | 1982 | cf2bb4a2-fc7d-4088-8c56-fd179f4cad32 |
| <i>Astragalus goldmanii</i>                         | McVaugh     | 91      | CAS | Mexico: Aguascalientes                                                    | 1959 | 15f98320-9be4-4665-a824-2b29af731764 |
| <i>Astragalus gombo</i>                             | Herrero     | AH3870  | MO  | Tunisia: Gabes: Metlaoui                                                  | 2009 | 1536870e-a1f0-408b-9bfe-3a870c5c0ebb |
| <i>Astragalus gracilis</i>                          | Higgins     | 5112    | NY  | United States of America: Texas: Oldham                                   | 1972 | d6f7a328-4f27-4616-94cd-82f9036ed4cf |
| <i>Astragalus granatensis</i>                       | Larsen      | 36079   | MO  | Italy: Sicily: Catania                                                    | 1977 | 2e7479b6-2a41-4964-8f7c-1abd2f233730 |
| <i>Astragalus graveolens</i>                        | Khan        | 1098    | HUH | Pakistan: Islamabad                                                       | 1977 | f7eba16e-156b-4cb0-b1af-86a99ba2c64a |
| <i>Astragalus grayi</i>                             | Hartman     | 10919   | NY  | United States of America: Wyoming: Washakie                               | 1980 | d6eb77ec-4400-410a-823e-c5bfc2def61  |
| <i>Astragalus griffithii</i>                        | Dieterle    | 1272    | NY  | Afghanistan: Bamyan                                                       | 1971 | ab7d85ae-157e-4da6-81b9-9423c003f098 |
| <i>Astragalus gruinus</i>                           | Wiggins     | 16627   | CAS | Mexico: Baja California: Ensenada                                         | 1961 | 15f37c46-b813-49cb-a3b8-609620666bd3 |
| <i>Astragalus guatemalensis</i>                     | Ruiz        | 618     | CAS | Mexico: Chiapas: Chamula                                                  | 1988 | 157c1046-3cd9-4942-a39e-05d9d3dbc5cb |
| <i>Astragalus gummifer</i>                          | Rechinger   | 11292   | MO  | Iraq: Erbil: Choman                                                       | 1957 | 0c6743e4-0d25-4b30-aa0c-d0ebd8c92637 |
| <i>Astragalus guttatus</i>                          | Korovin     | 20      | NY  | Kazakhstan: Turkistan: Saryaghash                                         | 1924 | cd451549-4999-41ed-9677-a5b447b7b232 |

|                                  |            |         |     |                                                 |      |                                      |
|----------------------------------|------------|---------|-----|-------------------------------------------------|------|--------------------------------------|
| <i>Astragalus gypsodes</i>       | Holmgren   | 6956    | NY  | United States of America: New Mexico: Eddy      | 1973 | d6e94ca3-9448-436c-85b6-5c6c6fdc010f |
| <i>Astragalus hajastanus</i>     | Sytin      | 6533    | NY  | Armenia                                         | 1981 | cf3fd5a2-31cf-45f7-b03c-c8bc57330543 |
| <i>Astragalus hallii</i>         | Grimes     | 2029    | NY  | United States of America: Utah: Kane            | 1981 | cb6b42df-4422-4310-826a-3eef4348ff77 |
| <i>Astragalus hamiltonii</i>     | Goodrich   | 27817   | NY  | United States of America: Utah: Uintah          | 2010 | cb613bdb-7b88-4659-b585-ad10d2cbb187 |
| <i>Astragalus hamosus</i>        | Miller     | 552     | MO  | Morocco: SW                                     | 1974 | 1533078d-1e49-45cb-8088-cb1bbd0d843a |
| <i>Astragalus harbisonii</i>     | Breedlove  | 71572   | CAS | Mexico: Baja California                         | 1991 | 15f239ba-7664-4b6a-8623-42034879183d |
| <i>Astragalus harrisonii</i>     | Welsh      | 21180   | NY  | United States of America: Utah: Wayne           | 1982 | d6e872e1-ee19-4e3d-9139-81406486e4ef |
| <i>Astragalus hartwegii</i>      | Ripley     | 14154   | CAS | Mexico: Zacatecas: Sombrerete                   | 1965 | 156a5fc3-aebd-4cd5-baa0-a077b6915acb |
| <i>Astragalus havianus</i>       | Boufford   | 39058   | HUH | People's Republic of China                      | 2007 | fa75b2c0-ec09-4199-b3ee-c8087e138b3a |
| <i>Astragalus hemsleyi</i>       | Freitag    | 5772    | NY  | Afghanistan: Logar                              | 1969 | ab66f5c1-6221-463a-a53c-e138dba5e4fb |
| <i>Astragalus heptapotamicus</i> | Goloskokov | 5771    | HUH | Kazakhstan: Almaty                              | 1971 | fa755eb9-7ca4-48b4-b017-bb4c322f48f7 |
| <i>Astragalus heterodontus</i>   | Gusev      | 4582    | NY  | Tajikistan: Pamir                               | 1958 | cea31600-9245-4ab5-8750-8ca85aaef5a  |
| <i>Astragalus hidalgensis</i>    | Delgado    | 1117    | CAS | Mexico: Hidalgo: Zimapan                        | 1979 | 160ebf3c-7a60-4564-9345-41a8ac853704 |
| <i>Astragalus himalayanus</i>    | Suzuki     | 9191431 | HUH | Nepal: Seti Zone: Bajhang Distr.                | 1991 | f8181a2b-b73b-4b15-b1e6-600f0f356280 |
| <i>Astragalus hispidulus</i>     | Pitard     | 87      | NA  | NA: NA: NA                                      | NA   | 157dce89-f110-454c-a498-daf58d1c34ae |
| <i>Astragalus hissaricus</i>     | [Cyrillic] | 1646    | HUH | [Cyrillic]                                      | 1960 | fa46b711-95e7-4cff-850c-1dcbee23afcb |
| <i>Astragalus hoantchy</i>       | Morefield  | 5141    | NY  | People's Republic of China: Xinjiang            | 1989 | cea20bae-5855-4b67-987d-4b53af3f5b29 |
| <i>Astragalus hoffmeisteri</i>   | Anders     | 5092    | NY  | Afghanistan: Kunar                              | 1970 | a9fb4d80-0213-4941-9abc-a743cfa71052 |
| <i>Astragalus holmgreniorum</i>  | Atwood     | 10742A  | NY  | United States of America: Utah: Washington      | 1985 | d6e86156-1e63-4f8f-b07d-2602e902efea |
| <i>Astragalus hololeios</i>      | Podlech    | 30604   | HUH | Afghanistan: Kabul                              | 1978 | f8009163-1488-4fbf-8141-f313100d132a |
| <i>Astragalus hoodianus</i>      | Halse      | 3397    | NY  | United States of America: Washington: Klickitat | 1987 | d6e770db-7dfd-4a20-a194-8c16e121f97c |
| <i>Astragalus hornii</i>         | Harbison   | s.n.    | CAS | Mexico: Baja California                         | 1953 | 160bc74d-3091-41b8-9dc8-5db0dba4206f |
| <i>Astragalus howellii</i>       | Ertter     | 7581    | NY  | United States of America: Oregon: Wasco         | 1988 | cb5363b0-03a2-468a-a111-d96c331b098c |
| <i>Astragalus humillimus</i>     | Neese      | 13080   | NY  | United States of America: Utah: Tooele          | 1983 | cb4c0096-5edd-497c-9559-0c910ede3c58 |

|                                |               |           |     |                                                      |      |                                      |
|--------------------------------|---------------|-----------|-----|------------------------------------------------------|------|--------------------------------------|
| <i>Astragalus humistratus</i>  | Atwood        | 25901     | NY  | United States of America: New Mexico: McKinley       | 2000 | cb49ea87-ecce-4137-b975-c04e6295e2ae |
| <i>Astragalus hyalolepis</i>   | Akhlerdov     | s.n.      | NY  | Armenia                                              | 1960 | cea15494-b378-4294-b11c-3895722aa6cb |
| <i>Astragalus hypoglottis</i>  | Krendl        | s.n.      | NY  | Italy: Tuscany: Lucca                                | 1981 | cf79c9f5-2fa9-4e98-8b50-ae6c085ebb6c |
| <i>Astragalus hypoleucus</i>   | NA            | NA        | NA  | Mexico: Tlaxcala: Tlaxcala                           | 1981 | 160637cb-b865-4456-8ae2-336cd013cf06 |
| <i>Astragalus hypoxylus</i>    | NA            | NA        | NA  | Mexico: Sonora: Yucón                                | 2004 | 14e11017-17cf-4e4a-a1a1-7a4c722c9c19 |
| <i>Astragalus hypsogenus</i>   | Budin         | LIL 71105 | NY  | Argentina: Tucumán: Burruyacú                        | 1930 | d1557db5-7e0d-4f14-a40c-6b0c99395cd0 |
| <i>Astragalus hyrcanus</i>     | Tzelev        | 3570151   | NY  | Russian Federation: Dagestan: Caucasus               | 1961 | cf5c4b06-03dd-4b66-a7c2-be0f362840d0 |
| <i>Astragalus ibicinus</i>     | Ledingham     | 4086      | NY  | Islamic Republic of Iran: Fars                       | 1965 | a9f3ca97-18aa-4721-b3c3-21efbaa9fa69 |
| <i>Astragalus ibrahimianus</i> | Reading Univ. | 750       | MO  | Morocco: GA: Oukaimeden                              | NA   | 1524c81a-b786-4521-a28e-83b4bc3c05f1 |
| <i>Astragalus idrietorum</i>   | Breedlove     | 60775     | CAS | Mexico: Baja California: Ensenada                    | 1984 | 1603e409-eda8-47db-b11f-8a2d900cf308 |
| <i>Astragalus igniarius</i>    | Hajiyev       | 3         | NY  | Azerbaijan: Baku                                     | 2006 | d1e8915e-d3ec-4071-97dc-23241cdc3f5a |
| <i>Astragalus illinii</i>      | Leon          | 3453      | NY  | Argentina: Chubut: Gastre                            | 1983 | d1556547-043d-4067-a698-cb3dcb450ff8 |
| <i>Astragalus incanus</i>      | Miller        | 703       | MO  | Morocco: AA                                          | 1974 | 1522c83e-4fdc-42fd-ac01-2b2c5d1ef9cb |
| <i>Astragalus incertus</i>     | [Cyrillic]    |           | NY  | Armenia                                              | 1965 | cea147f7-0a03-486a-855e-38ecd2745a69 |
| <i>Astragalus indurescens</i>  | Vassiljeva    |           | NY  | Uzbekistan                                           | 1962 | ce9f51c7-7465-42b1-9fc2-703128a3eedb |
| <i>Astragalus inflexus</i>     | Fishbein      | 3328      | NY  | United States of America: Washington: Asotin         | 1998 | cb3a480d-2805-42a6-8857-d49c7e04b8a3 |
| <i>Astragalus insularis</i>    | Breedlove     | 62490     | CAS | Mexico: Baja California                              | 1986 | 15e60a7f-f802-4e22-9dfc-6a0370a9e97b |
| <i>Astragalus inversus</i>     | Schoolcraft   | 2093      | NY  | United States of America: California: Lassen         | 1990 | d6c77a8c-6d19-48b8-9e4a-86aa9a609ece |
| <i>Astragalus inyoensis</i>    | Twisselmann   | 15545     | NY  | United States of America: California: Inyo           | 1969 | cb35a1e8-3b0f-4004-a530-1baeac99cc53 |
| <i>Astragalus iodopetalus</i>  | Barneby       | 17879     | NY  | United States of America: New Mexico: Rio Arriba     | 1983 | cba14a51-6b56-4c14-a620-d2bea8a262b3 |
| <i>Astragalus irolanus</i>     | Samuelsson    | 4390      | MO  | Syrian Arab Republic: Rif Dimashq                    | 1933 | 0c2e1b8e-62b8-444e-84a6-2bfdbc6102a9 |
| <i>Astragalus iselyi</i>       | Tuhy          | 3880      | NY  | United States of America: Utah: San Juan             | 2006 | cba10d3c-ef65-4bb4-bcd1-0874dc650a4e |
| <i>Astragalus iskanderi</i>    | Ledingham     | 3303      | NY  | Canada: Saskatchewan                                 | 1962 | cd52e99d-953d-40ec-952d-aa239b2d52ef |
| <i>Astragalus jaegerianus</i>  | Huggins       | 13-132    | NY  | United States of America: California: San Bernardino | 2013 | cb9f37b2-7c53-4c13-8a20-0e1d365c91c2 |
| <i>Astragalus jaliscensis</i>  | McVaugh       | 18468     | CAS | Mexico: Aguascalientes                               | 1960 | 16316cd4-9906-4a1e-b0c0-bc9026fb7b89 |

|                                     |               |        |     |                                                                           |      |                                      |
|-------------------------------------|---------------|--------|-----|---------------------------------------------------------------------------|------|--------------------------------------|
| <i>Astragalus jejunus</i>           | Tiehm         | 9665   | NY  | United States of America: Nevada: Elko                                    | 1985 | cb9e7b4d-6ab2-41f3-b46c-2db75027f746 |
| <i>Astragalus johannis</i>          | Ledingham     | 4114   | NY  | Islamic Republic of Iran: Fars                                            | 1965 | ab666b01-925c-428c-be85-e38976c97ecb |
| <i>Astragalus johannis-howellii</i> | Honer         | 316    | NY  | United States of America: California: Mono                                | 2000 | d6b92c54-e776-49dc-ac64-c42a8e7b9622 |
| <i>Astragalus jolderensis</i>       | Popov         | 6259   | HUH | Turkmenistan: Kopetdag                                                    | 2018 | ffc1f985-384b-4112-a5b7-a83b17aeb489 |
| <i>Astragalus josephi</i>           | Rock          | 17937  | HUH | People's Republic of China: Southwestern Szechwan: Muli (or Mili) Kingdom | 1929 | 0067d468-4031-4c60-b5dd-a7bcd1c8663a |
| <i>Astragalus juratzkanus</i>       | [Cyrillic]    | s.n.   | HUH | [Cyrillic]                                                                | 1925 | 00bdfc36-a0b1-418c-a5b7-94afee749c88 |
| <i>Astragalus kabadianus</i>        | Vvedensky     | 225    | HUH | Uzbekistan: Khadzha-Ipak: Pamir-Alay                                      | 1930 | 0046e608-c288-4662-94b4-26ea027cb690 |
| <i>Astragalus kadschorensis</i>     | Lachashvili   | 142    | NY  | Georgia                                                                   | 2005 | d0bd5d31-873b-4a9e-976f-2411b11a43df |
| <i>Astragalus kahiricus</i>         | Grant         | 15,356 | NY  | Islamic Republic of Iran: Sistan and Baluchestan: Zahedan                 | 1964 | ab664be0-9827-4d06-b4a1-3d8602719271 |
| <i>Astragalus karabaghensis</i>     | [Cyrillic]    | s.n.   | NY  | [Cyrillic]                                                                | 1955 | cd5765f9-d90f-4df8-8f1f-76c00c3eb406 |
| <i>Astragalus karakugensis</i>      | Tzvelev       | 7134   | NY  | Russian Federation: Dagestan                                              | 1961 | cd54666e-4826-4263-a0a9-84dc760b45db |
| <i>Astragalus karakuschensis</i>    | [Cyrillic]    | s.n.   | NY  | Armenia                                                                   | 1955 | cd59d4ed-cf7b-48d2-8a17-661059938a11 |
| <i>Astragalus kasachstanicus</i>    | Ragkovska     | 8157   | NY  | Kazakhstan: Karaganda                                                     | 1966 | cd5ca40c-f18b-493a-9ae9-b78f202a6d95 |
| <i>Astragalus kaschkadarjensis</i>  | Vvedensky     | 6217   | HUH | Uzbekistan                                                                | 1929 | 0042832f-3b6f-4f9c-835d-e2e9f1d464fa |
| <i>Astragalus kashmarensis</i>      | Singh         | 2771   | NY  | India: Ladakh                                                             | 1971 | ab5b90c8-ae28-47de-9065-b546426154e3 |
| <i>Astragalus kazbeki</i>           | Abdaladze     | 241    | NY  | Georgia: Mtskheta-Mtianeti: Kazbegi                                       | 2004 | d0d553dc-d0ac-4bef-9404-a83702a29b0d |
| <i>Astragalus kelifii</i>           | Vvedensky     | 387    | NY  | Uzbekistan: Surxondaryo                                                   | 1927 | cd5dcd50-24d8-4b48-8211-3c4273e79f0f |
| <i>Astragalus kentrophyta</i>       | Smith         | 5413   | NY  | United States of America: Idaho: Owyhee                                   | 2005 | cb9df1ff-502f-42ea-a53b-0ee9e45fdd31 |
| <i>Astragalus kialensis</i>         | D.E. Boufford | 29915  | HUH | People's Republic of China                                                | 2000 | 003604b7-3fc3-4d9d-8246-cfb168facc7a |
| <i>Astragalus kifonsanicus</i>      | [None]        |        | HUH | People's Republic of China: Sung.: Tsinan                                 | 1924 | 00344364-90d4-4d32-83ac-3452b96ad573 |
| <i>Astragalus kirrindicus</i>       | Grant         | 15,77  | NA  | Islamic Republic of Iran: Fars: Shiraz                                    | 1964 | e5b65a2a-fe55-4747-9596-e271125243e5 |
| <i>Astragalus knightii</i>          | Knight        | 1922   | NY  | United States of America: New Mexico: Sandoval                            | 1982 | cb99c9ad-6b5b-4fdf-a78e-8819018579d6 |

|                                                                       |                 |        |      |                                                         |      |                                       |
|-----------------------------------------------------------------------|-----------------|--------|------|---------------------------------------------------------|------|---------------------------------------|
| <i>Astragalus kolymensis</i>                                          | Korobkov        | s.n.   | NY   | Russian Federation: Chukotka:<br>Anadyrsky              | 1979 | ce99b062-a55e-4865-9b41-d1d82cf0d1b6  |
| <i>Astragalus krauseanus</i>                                          | Baranov         | s.n.   | HUH  | Uzbekistan                                              | 1923 | 00211a6f-dbc5-4323-bdb5-20631e1280c0  |
| <i>Astragalus kudrjaschovii</i>                                       | Borissova       | 37     | HUH  | Russian Federation                                      | 1960 | 009dd2d9-7e7d-40cb-baa9-d51d183db794  |
| <i>Astragalus kulabensis</i>                                          | [Cyrillic]      | 1120   | HUH  | Tajikistan                                              | 1960 | 00b28180-39bf-46fe-b2a1-a1ee4a889123  |
| <i>Astragalus kuramensis</i>                                          | Volk            | 71/844 | NY   | Afghanistan: Paktia                                     | 1971 | ab480268-1737-477e-a026-7abbd2798914  |
| <i>Astragalus kurdaicus</i>                                           | G. F. Ledingham | 3477   | NY   | Canada: Saskatchewan                                    | 1963 | ce943280-1f8f-4042-87f8-efc00c7f8f4f  |
| <i>Astragalus kuschakewiczii</i>                                      | Boufford        | 27861  | HUH  | People's Republic of China:<br>Sichuan                  | 1997 | 00cb1843-4ba5-44eb-94f4-841bf04933bd  |
| <i>Astragalus kuschakewiczii</i><br>( <i>Astragalus mongutensis</i> ) | Morefield       | 5243   | NY   | People's Republic of China:<br>Xinjiang Uygur Zizhiqu   | 1989 | b0eaf9cd-e712-4d27-b1e4-518bb765275b  |
| <i>Astragalus kuschkensis</i>                                         | Butkov          | 6218   | HUH  | Turkmenistan                                            | 1946 | 00c2473d-f954-4d92-a23f-0cc1ce92e961  |
| <i>Astragalus laetus</i>                                              | Volk            | 147    | NY   | Afghanistan: Kabul                                      | 1950 | ab437cf7-91a5-46e3-ace9-c7180a6759b9  |
| <i>Astragalus lagopoides</i>                                          | Lamond          | 4098   | NY   | Islamic Republic of Iran: West<br>Azerbaijan            | 1971 | ab29bc5a-07be-4c39-a0c6-eeecd69358aee |
| <i>Astragalus laguriformis</i>                                        | Ledingham       | 4212   | NY   | Islamic Republic of Iraniran                            | 1965 | ab297796-5773-4e65-84ec-216b7149d65e  |
| <i>Astragalus laguroides</i>                                          | [Cyrillic]      | 90     | HUH  | Russian Federation                                      | 1979 | fa206d78-8fbb-4d2c-8ed4-f3685a6aeecb  |
| <i>Astragalus lanuginosus</i>                                         | Goloskokov      | 5772   | NY   | Kazakhstan                                              | 1971 | ce8350c4-4172-4529-a11f-34ec466b0d38  |
| <i>Astragalus lasiosemius</i>                                         | Anders          | 7234   | NY   | Afghanistan: Badakhshan                                 | 1971 | ab262957-a407-41cd-86a9-747f1d3136a7  |
| <i>Astragalus lasiostylus</i>                                         | Popov           | 6261   | HUH  | Uzbekistan: Samarqand: Urgut                            | 1928 | 0062e39a-5693-4b7f-be19-d45a80c6d33d  |
| <i>Astragalus laxmannii</i> ( <i>Astragalus adsurgens</i> )           | Boufford        | 27113  | HUH  | People's Republic of China: Beijing                     | 1996 | 001e1e76-135d-424b-bec1-e45967b897ff  |
| <i>Astragalus laxmannii</i>                                           | Boufford        | 40308  | HUH  | People's Republic of China:<br>Sichuan: Ruoergai        | 2007 | 0059ba0b-8ef5-4832-bf03-14b48ab61fc0  |
| <i>Astragalus layneae</i>                                             | Higgins         | 8367   | NY   | United States of America:<br>California: San Bernardino | 1974 | cb83f291-bf88-4a32-84d3-1c31f018dd5f  |
| <i>Astragalus leibergii</i>                                           | Spellenberg     | 1665   | NY   | United States of America:<br>Washington: Kittitas       | 1967 | d6a4e5b5-3d91-4dc6-aeda-c190467edd02  |
| <i>Astragalus lemmonii</i>                                            | Ertter          | 6722   | NY   | United States of America:<br>California: Mono           | 1986 | d74c4143-b0a3-40ef-9a86-5796f088d796  |
| <i>Astragalus lentiformis</i>                                         | Quesenberry     | 32.1   | FLAS | United States of America:<br>California: Plumas         | 2006 | e941b3ca-c0ad-4514-b605-d7684001bd70  |

|                                                                          |            |         |      |                                                                 |      |                                      |
|--------------------------------------------------------------------------|------------|---------|------|-----------------------------------------------------------------|------|--------------------------------------|
| <i>Astragalus lentiginosus</i>                                           | Lehto      | L21308  | FLAS | United States of America: Arizona:<br>Not shown                 | 1977 | e9ab5881-86ad-4d25-8b05-4e7dab85d40f |
| <i>Astragalus lentiginosus</i><br>( <i>Astragalus iodanthus</i> )        | Holmgren   | 4130    | TEX  | United States of America: Nevada:<br>Pershing                   | 1970 | 21607353-8d63-4b7c-a97f-4d6ce0dfb61f |
| <i>Astragalus leontinus</i>                                              | Pistarino  | s.n.    | OS   | Italy: Valle d'Aosta                                            | 1986 | e59f67fa-416d-4651-985c-375a5a0cd7f9 |
| <i>Astragalus lepsensis</i>                                              | Roldugin   | 4819    | HUH  | Kazakhstan                                                      | 1964 | 0034c885-0543-425a-a6d8-592b7795bbad |
| <i>Astragalus leptocarpus</i>                                            | Thomas     | 103,645 | FLAS | United States of America:<br>Arkansas: Ouachita                 | 1988 | e9a49f11-2742-4c3a-8c48-1ed9155c3377 |
| <i>Astragalus leptocaulis</i>                                            | Schischkin | 3717    | HUH  | Kazakhstan: East Kazakhstan:<br>Oskemen                         | 1931 | 0016f6ce-c875-41c8-b0e0-06f00661b527 |
| <i>Astragalus leucocephalus</i>                                          | Shahzad    | 134     | HUH  | Pakistan: Punjab: Rawalpindi                                    | 1976 | f7f3de28-f614-4337-b50e-e60df68e95c5 |
| <i>Astragalus leucolobus</i>                                             | Thorne     | 51946   | NY   | United States of America:<br>California: San Bernardino         | 1978 | d57dac91-feff-4689-84d6-d58306b9959d |
| <i>Astragalus lilacinus</i>                                              | W6 AMD     | 126     | NY   | Islamic Republic of Iran: North<br>khorasan: Maneh and Samalqan | 1977 | aafe5a64-67b5-4eec-b9c8-fc1b3d073473 |
| <i>Astragalus limariensis</i>                                            | Jiles      | 2831    | OS   | Chile: Coquimbo (IV): Choapa                                    | 1955 | e457d48c-d384-4c42-b876-d7a01e186c2c |
| <i>Astragalus limnocharis</i>                                            | Isely      | 11475   | NY   | United States of America: Utah:<br>Kane                         | 1971 | d78d267b-be70-45d6-a119-1e244374a825 |
| <i>Astragalus lindheimeri</i>                                            | Barneby    | 18280   | NY   | United States of America: Texas:<br>Stonewall                   | 1989 | cc0008c0-ec0a-4545-918e-4bf8887906be |
| <i>Astragalus lineatus</i> ( <i>Astragalus</i><br><i>gezeldarensis</i> ) | [Cyrillic] | s.n.    | NY   | Armenia                                                         | 1955 | cd436bf4-a72e-43cf-918a-c6988dd20779 |
| <i>Astragalus lineatus</i> ( <i>Astragalus</i><br><i>grammocalyx</i> )   | Ledingham  | 4167    | NY   | Islamic Republic of Iran                                        | 1965 | ab872349-0994-4645-896e-5e70dd1de4fc |
| <i>Astragalus linifolius</i>                                             | Atwood     | 8742    | NY   | United States of America:<br>Colorado: Mesa                     | 1982 | cb833c0c-068a-4bbf-ac89-fb367f4c6bbc |
| <i>Astragalus lipskyi</i>                                                | Kamelin    | 6220    | HUH  | Uzbekistan                                                      | 1930 | 00400878-9697-4bc4-9024-0b031cb4d8fd |
| <i>Astragalus litwinowii</i>                                             | Ledingham  | 4824    | NY   | Canada: Saskatchewan                                            | 1966 | ce7aaaec-2a82-4350-8b09-4185a71d9b38 |
| <i>Astragalus loanus</i>                                                 | Welsh      | 26797   | NY   | United States of America: Utah:<br>Sevier                       | 1997 | cc007253-cd08-4576-880a-270e29e0355e |
| <i>Astragalus lonchocarpus</i>                                           | Atwood D   | 8732    | NY   | United States of America: Nevada:<br>Lincoln                    | 1982 | d786c784-6dce-4991-adce-3fd7b125630e |
| <i>Astragalus longipetalus</i>                                           | Skvortsov  |         | NY   | Russian Federation: Volgograd:<br>Dubovsky                      | 1967 | cf5de8f0-82e4-4938-9dfc-d8dc2c6782ab |
| <i>Astragalus longipetiolatus</i>                                        | Klinkova   | s.n.    | NY   | Russian Federation: Astrakhan                                   | 1990 | cd74498f-550d-4cc8-b910-62aca8862062 |



|                                 |                         |        |      |                                                 |      |                                      |
|---------------------------------|-------------------------|--------|------|-------------------------------------------------|------|--------------------------------------|
| <i>Astragalus longissimus</i>   | Reina                   | 97-618 | CAS  | Mexico: Sonora: Yecora                          | 1997 | 14db4077-376f-486b-ae3-ade6c0114e54  |
| <i>Astragalus looseri</i>       | Kiesling                | 7696   | NY   | Argentina: San Juan: Calingasta                 | 1991 | d12b1581-e70e-4e9b-acc5-92d5fd203fa2 |
| <i>Astragalus lotiflorus</i>    | Boivin                  | 9984   | NY   | Canada: Saskatchewan: Swift Current             | 1952 | d7864769-e11c-471d-9ef8-824427365056 |
| <i>Astragalus lumsdenianus</i>  | Podlech                 | 29566  | NY   | Afghanistan: Herat                              | 1977 | aaf3adc5-852c-435e-a6b9-430766dfb424 |
| <i>Astragalus lupulinus</i>     | Popov                   | 3823   | NY   | Russian Federation                              | 1953 | adae4e0b-7d34-46ef-9287-fc8293b3e386 |
| <i>Astragalus lutosus</i>       | Franklin                | 7298   | FLAS | United States of America: Utah: Wasatch         | 1990 | e9a2b0d0-504d-49ec-bbee-201909aa23e3 |
| <i>Astragalus lyallii</i>       | Fishbein                | 3367   | NY   | United States of America: Washington: Not shown | 1998 | d7831d5e-f4e0-449d-af11-736892fca126 |
| <i>Astragalus macrobotrys</i>   | Vasak                   | s.n.   | NY   | Turkmenistan                                    | 1984 | adac4ddb-2e8f-44ba-adb7-64cbbb7d3d8c |
| <i>Astragalus macrocephalus</i> | Astragalus Macropetalus | 6222   | HUH  | Not shown                                       | 1923 | fe6c62f9-45a6-4e15-b780-12e926904018 |
| <i>Astragalus macrocladus</i>   | Popov                   | 6221   | HUH  | Tajikistan: Kaznak                              | 1924 | 0032ece3-50b0-460b-acbd-f2395cec37e2 |
| <i>Astragalus macrodon</i>      | Ledingham               | 4040   | NY   | United States of America: California: Kern      | 1964 | d78113b6-9eec-4f25-9a2d-03e6d46eb248 |
| <i>Astragalus macropelmatus</i> | Ledingham               | 4198   | NY   | Islamic Republic of Iran: Kermanshah: Harsin    | 1965 | aaf31dad-500d-4958-9f33-36b94d3af6c2 |
| <i>Astragalus macropodium</i>   | [Cyrillic]              | 1624   | HUH  | Russian Federation                              | 1960 | 00a424e7-9aeb-4e37-a05d-187be42e8196 |
| <i>Astragalus macropterus</i>   | Orazova                 | 5377   | HUH  | Kazakhstan: Shymkent: Shymkent                  | 1968 | 00fa1b32-39b8-4c36-a7d1-5407169abd30 |
| <i>Astragalus macropus</i>      | Sagalaev                |        | NY   | Russian Federation: Saratov: Pereljub           | 1993 | a9dcd1cd-2034-4509-bbf6-c931feb855d9 |
| <i>Astragalus macrostachys</i>  | Ledingham               | 5200   | NY   | Canada: Saskatchewan                            | 1969 | b020cdeb-acb0-4836-856e-57837ed820f3 |
| <i>Astragalus macrotropis</i>   | Blak                    | 3319   | NY   | Kazakhstan: Zhambyl                             | 1909 | adae75d7-3ff6-4a72-b58e-2b63a2666c06 |
| <i>Astragalus magdalenae</i>    | Felger                  | 12450  | CAS  | Mexico: Sonora: Hermosillo                      | 1965 | 166cafdb-4327-458f-a62d-0ec50592628d |
| <i>Astragalus mahoschanicus</i> | Ho                      | 1466   | HUH  | People's Republic of China                      | 1993 | 00d221dd-cbc6-4e59-af08-a2b07e5c3235 |
| <i>Astragalus malacoides</i>    | Welsh                   | 21188  | NY   | United States of America: Utah: Garfield        | 1982 | d7794608-3380-46b9-8201-cb93c584fda7 |
| <i>Astragalus malacus</i>       | Otting                  | 511    | NY   | United States of America: Oregon: Malheur       | 2003 | cbf0adcd-c1c8-4da7-a01e-42fd8b0436cf |
| <i>Astragalus managildensis</i> | Sovetkina               | 389    | NY   | Kazakhstan                                      | 1925 | b0200651-36d1-4398-9683-fa1baca1ab0b |
| <i>Astragalus mareoticus</i>    | Podlech                 | 35210  | NY   | Algeria: Adrar: Timimoun                        | 1981 | aae97c8e-6a60-4ec4-b284-dea2da0ad0b6 |
| <i>Astragalus maroccanus</i>    | M'sabih Talaa           | 102    | NY   | Morocco: montana: not shown                     | 1986 | d03fec64-63a2-4655-b7f7-780d126a6a3c |

|                                  |                |          |      |                                                      |      |                                      |
|----------------------------------|----------------|----------|------|------------------------------------------------------|------|--------------------------------------|
| <i>Astragalus masenderanus</i>   | Bornmuller     | 6855     | NY   | Islamic Republic of Iran                             | 1902 | b076641e-4835-445d-a406-e8b8f30f2883 |
| <i>Astragalus mattam</i>         | M. Gilbert     | 1286     | HUH  | People's Republic of China                           | 1993 | 00cf8891-0e51-421a-b6ce-8b65e2d46637 |
| <i>Astragalus maurorum</i>       | Lippert        | 21917    | NY   | Morocco: Taza                                        | 1987 | d03f68bb-3d34-4d6b-904f-b149a3cf6088 |
| <i>Astragalus maximowiczii</i>   | Butkov         | 6224     | HUH  | Turkmenistan                                         | 1930 | 00ba1fb6-feba-4bdb-83f9-9af440cd07b5 |
| <i>Astragalus maxwellii</i>      | Kanai          | 852281   | HUH  | Japan                                                | 1972 | f81dbfe0-92c0-4b04-860d-f7285cee1b3e |
| <i>Astragalus medius</i>         | Androssov      |          | NY   | Kazakhstan                                           | 1909 | b103229b-6984-40c0-acf5-6aa6f7f0a309 |
| <i>Astragalus megacarpus</i>     | Tiehm          | 14272    | NY   | United States of America: Nevada: Elko               | 2003 | cbeac4a8-32e3-46f9-882d-96e54e41c283 |
| <i>Astragalus megalanthus</i>    | Schischkin     | s.n.     | NY   | Kazakhstan: East Kazakhstan: Oskemen                 | 1931 | b0f70e84-3b7f-44bc-8d86-cc28822b90c8 |
| <i>Astragalus megalomerus</i>    | Pojarkova      | 1177/216 | HUH  | Tajikistan                                           | 1944 | 00d3f1d7-ba08-4b84-b0b0-3d30e520e201 |
| <i>Astragalus melanostachys</i>  | Koelz          | 2910     | NY   | India                                                | 1931 | aae976f3-98cc-4f80-ad11-b137f2c207a7 |
| <i>Astragalus melilotoides</i>   | Bartholomew B. | 2075     | HUH  | People's Republic of China: Beijing                  | 1984 | 00b483eb-8a6c-4767-8c3d-2c1261984c74 |
| <i>Astragalus mesites</i>        | Abemuceu       |          | NY   | [Cyrillic]                                           | 1956 | adaaa596-14fe-4edb-a317-0bf947ee1646 |
| <i>Astragalus michauxii</i>      | William B Fox  | 4639     | FLAS | United States of America: North Carolina: Cumberland | 1951 | ea2d1432-591a-4304-9022-00c51132cd23 |
| <i>Astragalus micranthellus</i>  | Ricardi        | 30266    | OS   | Chile: Tarapaca: Iquique                             | 1961 | e44840bc-2b6a-4271-9c0c-026401aec941 |
| <i>Astragalus micranthus</i>     | Hernandez      | s.n.     | CAS  | Mexico: Mexico                                       | 1967 | 165e73d7-9d01-448d-abfe-14b7c2df5380 |
| <i>Astragalus microcalycinus</i> | Lamond         | 2029     | NY   | Afghanistan                                          | 1965 | aad78ff4-f5c2-4362-aed6-5da131741bda |
| <i>Astragalus microcephalus</i>  | Hageskuna      | 152      | NY   | Russian Federation: Leningrad: Northwestern          | 1953 | af5b069d-ac93-489f-80a7-3aac3ba4a1b9 |
| <i>Astragalus microcystis</i>    | Lesica         | 4816     | NY   | United States of America: Montana: Sanders           | 1989 | cbe42b45-89e7-42c5-8a95-56f7bed06a40 |
| <i>Astragalus micromerius</i>    | Atwood         | 30432    | NY   | United States of America: New Mexico: McKinley       | 2004 | d775a89e-6129-484d-86ea-e5bec8819e6  |
| <i>Astragalus microphysa</i>     | Assadi         | 1838     | NY   | Islamic Republic of Iran: KERMAN: Unknown            | 1977 | cd613e04-1576-4605-8222-4f6cd18d0ff1 |
| <i>Astragalus micropterus</i>    | Donmez         | 2776     | NY   | Turkey                                               | 1990 | aa7fc535-6266-4ef1-a0f0-ef5d4aa4e280 |
| <i>Astragalus miguelensis</i>    | R.M Beauchamp  | 22703    | FLAS | United States of America: California                 | 1975 | e9a0dcb6-2e63-49ba-9cb8-b040b72ccf38 |
| <i>Astragalus miniatus</i>       | [Cyrillic]     | [?]738   | NY   | Mongolia                                             | 1941 | ada40d54-201a-4d41-93cb-5463c05c0b3d |
| <i>Astragalus minimus</i>        | Asplund        | 2672     | NY   | Bolivia (Plurinational State of): La Paz: Pacajes    | 1921 | d12a799b-568f-4e9f-9b5d-2860f4bb038a |

|                                                          |                    |           |      |                                                 |        |                                      |
|----------------------------------------------------------|--------------------|-----------|------|-------------------------------------------------|--------|--------------------------------------|
| <i>Astragalus minthorniae</i>                            | Clokey             | 7575      | FLAS | United States of America: Nevada: Clark         | 1937   | e9a09e30-60dd-49ad-a68b-d4c238dd5996 |
| <i>Astragalus minutidentatus</i>                         | Iokawa             | 20310064  | HUH  | Nepal                                           | 2003   | f7daa87d-9c94-4450-b671-5e62f1c85d35 |
| <i>Astragalus minutissimus</i>                           | Marticorena        | 30228     | OS   | Chile: Tarapaca                                 | 1964   | e5303619-f497-41fa-b110-7fef53167072 |
| <i>Astragalus mirabilis</i>                              | Rassulova          | 62        | NY   | Tajikistan                                      | 1976   | aeb01698-7b96-4ed9-ac81-0e1f802f1e8d |
| <i>Astragalus misellus</i>                               | Camp               | 904       | NY   | United States of America: Washington: Klickitat | 1982   | d769abcb-df0d-448e-8293-86df9d3c5b80 |
| <i>Astragalus miser</i>                                  | Foster             | 12038     | NY   | United States of America: Idaho: Power          | 2001   | cbe11c1e-1bb7-44f6-998f-3244f1735d06 |
| <i>Astragalus missouriensis</i>                          | Thorne             | 18488     | FLAS | United States of America: Iowa: Woodbury        | 1957   | e99bf887-c6bb-4971-9cd6-0d110006af97 |
| <i>Astragalus moencoppensis</i>                          | Cronquist          | 9198      | NY   | United States of America: Utah: Emery           | 1961   | d7616b4c-9eed-445f-ab1c-a7b130e5052f |
| <i>Astragalus mohavensis</i>                             | Leary              | 5952      | NY   | United States of America: Nevada: Nye           | 1999   | cbaf813a-a735-47de-9cb5-275ba4aff8b2 |
| <i>Astragalus mokiaceus</i>                              | Atwood             | 12165     | NY   | United States of America: Utah: Washington      | 1986   | cba34a4d-3f20-4c18-9e18-227ca9b55a14 |
| <i>Astragalus mollissimus</i>                            | Lyonnet            | 540700001 | CAS  | Mexico: Mexico                                  | 1954   | 14dd7129-aab8-457b-9ca5-91e0d971ff20 |
| <i>Astragalus molybdenus</i>                             | Wilken             | 14124     | NY   | United States of America: Colorado: Gunnison    | 1984   | cc2c08dd-0f0f-4012-8a99-9291e1107a18 |
| <i>Astragalus monadelphus</i>                            | Ching              | 427       | NY   | People's Republic of China: Kansu               | 1923   | b0ec3328-36ba-4cf2-af86-cd2570c5e0a1 |
| <i>Astragalus monanthemus</i>                            | Ledingham          | 4095      | NY   | Islamic Republic of Iran: Gardaneh Nabaty       | 1965   | ab1cd250-5c7c-46fb-9d19-f5f2ac6d69e7 |
| <i>Astragalus monbeigii</i>                              | Boufford           | 27351     | HUH  | People's Republic of China: Sichuan             | 1997   | 01778c1b-e56f-467e-94fa-e30498681fab |
| <i>Astragalus mongholicus</i>                            | Boufford           | 33843     | HUH  | People's Republic of China                      | 2005   | 015d9362-f48f-4653-8b84-7f4c8978bb50 |
| <i>Astragalus mongholicus (Astragalus penduliflorus)</i> | Elias              | 7223      | MO   | Russian Federation: Altai: Gorno-Altaysk        | 1983   | 0bce7b14-583b-4d27-bf54-d3af73de58df |
| <i>Astragalus mongholicus (Astragalus propinquus)</i>    | Ho                 | 1984      | HUH  | People's Republic of China: Qinghai             | 1996   | 017e14ae-9939-4a3e-88e0-1e95de46affb |
| <i>Astragalus mongholicus (Astragalus propinquus)</i>    | Ikonnikov-Galitzky | 2573      | HUH  | Mongolia                                        | 1929   | 010007ef-30bd-4fac-b67e-134794a7b2e3 |
| <i>Astragalus mongholicus (Astragalus penduliflorus)</i> | Schastin           |           | HUH  | Mongolia                                        | [None] | 013b6f7c-b9a1-42ea-94f3-4b2c455b5015 |
| <i>Astragalus monoensis</i>                              | Spellenberg        | 2877      | NY   | United States of America: California: Mono      | 1972   | cc23462b-8ba6-405c-b221-d284736b2234 |
| <i>Astragalus monspessulanus</i>                         | Bornmuller         | 3878      | NY   | Macedon                                         | 1918   | d2200f72-0e7b-4e8e-a76f-fd80f115fda7 |

|                                  |              |         |     |                                                   |      |                                      |
|----------------------------------|--------------|---------|-----|---------------------------------------------------|------|--------------------------------------|
| <i>Astragalus monticola</i>      | Kiesling     | 8073    | OS  | Argentina: San Juan: Calingasta                   | 1992 | e52c9920-e5c5-4e70-aa6f-0226ea026ffe |
| <i>Astragalus monumentalis</i>   | Knight       | 1397    | NY  | United States of America: New Mexico: San Juan    | 1981 | d75cca14-6f86-4d5b-af24-e9edf2ff5ad2 |
| <i>Astragalus moranii</i>        | Moran        | 23268   | TEX | Mexico: Baja California: Ensenada                 | 1976 | 20f4e16d-0e0e-4be3-b39f-3b3ee1c9a021 |
| <i>Astragalus mucidus</i>        | Vvedensky    | 13      | NY  | Uzbekistan: Taschkent                             | 1922 | b0e570e3-86c2-4b53-911a-022083c37074 |
| <i>Astragalus mucronifolius</i>  | Bokhari      | 2091    | NY  | Islamic Republic of Iran: Fars                    | 1977 | ab10775c-01bd-48dc-af7b-6fe2cf497f32 |
| <i>Astragalus mugosaricus</i>    | Rusanov      | 533     | NY  | Kazakhstan: Aktyubinskaya                         | 1927 | b0e10e5d-84e2-496e-9b1e-8d8390b68e9a |
| <i>Astragalus mulfordiae</i>     | Rosentreter  | 4890    | NY  | United States of America: Oregon: Malheur         | 1988 | d75d9a78-f94a-44cf-b87c-5032928debb2 |
| <i>Astragalus muliensis</i>      | Boufford     | 29809   | HUH | People's Republic of China                        | 2000 | 0155f375-5224-4e7a-a351-3a6d9a07d17d |
| <i>Astragalus munroi</i>         | G .Singh     | 4443    | NY  | India: Kashmir: Ladakh                            | 1971 | ab0c39c4-eaf2-43ae-a20f-bffbab6ed559 |
| <i>Astragalus murinus</i>        | G. Ledingham | 4149    | NY  | Islamic Republic of Iran                          | 1965 | cd8dee03-0837-40a9-9e94-d06c1bc126cb |
| <i>Astragalus muschketovii</i>   | Puczko       | 6265    | HUH | Not shown: Not shown: Not shown                   | 1968 | 01472c90-602c-44bc-8831-a2a53471c23c |
| <i>Astragalus musiniensis</i>    | Higgins      | 1253    | NY  | United States of America: Utah: Emery             | 1968 | cc1491af-2880-419c-b46f-e37d184e2fe9 |
| <i>Astragalus namanganicus</i>   | Popov        | 391     | NY  | Uzbekistan                                        | 1926 | b0df7dd2-ff05-49e3-8f11-0933962bc39f |
| <i>Astragalus naturitensis</i>   | Hartman      | 89334   | NY  | United States of America: Colorado: Mesa          | 2010 | d74d4cca-5c72-48ee-9f27-cce4d3375673 |
| <i>Astragalus neglectus</i>      | Boivin       | 12907   | NY  | Canada: Manitoba                                  | 1958 | d747ad41-f6a8-4c4e-9f2e-c1d94a657ebe |
| <i>Astragalus nelsonianus</i>    | Huber        | 5428    | NY  | United States of America: Wyoming: Sweetwater     | 2016 | d5061049-5e55-45da-b34d-8c02149f5e93 |
| <i>Astragalus nematodes</i>      | Goloskokov   | 4473    | NY  | Kazakhstan: Zhambyl                               | 1963 | b0db40f3-1d7b-4687-a4ae-43ef0a95353e |
| <i>Astragalus neolipskyanus</i>  | Goloskokov   | 4474    | NY  | Kazakhstan: Zhambyl                               | 1963 | b0d00aab-913e-4d0e-b7bd-20a41bbadedb |
| <i>Astragalus neomexicanus</i>   | Spellenberg  | 2091    | NY  | United States of America: New Mexico: Otero       | 1969 | d50474b6-d1dc-40a5-b7ce-04d4c1a0823f |
| <i>Astragalus neomonadelphus</i> | Boufford     | 30414   | HUH | People's Republic of China: Sichuan: Xiangcheng   | 2004 | 013c2314-9bbc-4557-9fd3-609ba222f37e |
| <i>Astragalus neuquenensis</i>   | Selander     | 88-A-24 | NY  | Argentina: Chubut: Paso de Indios                 | 1987 | d1088018-b950-4cbe-bc9d-edf9743b38cf |
| <i>Astragalus neurophyllus</i>   | Borissova    | 1631    | HUH | [Cyrillic]                                        | 1960 | 01388adf-b87e-4a54-b630-6c8ec31386dc |
| <i>Astragalus nevinii</i>        | Moran        | 22704   | NY  | United States of America: California: Los Angeles | 1975 | d5008e71-641f-43ae-a7ae-cdef81471e9a |

|                                 |              |          |      |                                                         |      |                                      |
|---------------------------------|--------------|----------|------|---------------------------------------------------------|------|--------------------------------------|
| <i>Astragalus newberryi</i>     | Pinzl        | 9496     | NY   | United States of America: Nevada:<br>White Pine         | 1991 | cc0a2ee1-b03a-4b01-a20e-ed0fe22d2c19 |
| <i>Astragalus nicolai</i>       | Goloskokov   | 4327     | NY   | Kazakhstan                                              | 1959 | b0cb426f-a28f-47ca-a838-87504f6a4b42 |
| <i>Astragalus nidularius</i>    | Welsh        | 9889     | NY   | United States of America: Utah:<br>Wayne                | 1970 | d5d77caf-607d-4a9e-9164-e1fbfa164443 |
| <i>Astragalus nigricans</i>     | Linczewski   | 6226     | HUH  | Turkmenistan: Badhyz                                    | 1930 | 0134cf13-078a-4e6c-bd47-b632003a219a |
| <i>Astragalus ninae</i>         | Androssov    | 3321     | NY   | Kazakhstan                                              | 1908 | b0c43d88-2bd5-4c06-86e8-6dcd80391813 |
| <i>Astragalus nivalis</i>       | Ho           | 1136     | HUH  | People's Republic of China:<br>Qinghai                  | 1993 | 0113b67a-22d5-4b70-bef0-ce1256057a3b |
| <i>Astragalus nivicola</i>      | Guerrido     | 443      | NY   | Argentina: Santa Cruz                                   | 2001 | d1165230-4568-4f64-aefd-dff4de319505 |
| <i>Astragalus nobilis</i>       | Zakrzewski   | 6227     | HUH  | Uzbekistan                                              | 1930 | 010a7d50-a3e4-4775-b585-5ae6e36aef9c |
| <i>Astragalus norvegicus</i>    | Moldenke     | 21002    | NY   | Sweden: Norrbotten: Kiruna                              | 1950 | d0b86805-bdcd-4822-aac9-352a90dc7723 |
| <i>Astragalus nothoxys</i>      | van Devender | 97-387   | CAS  | Mexico: Sonora: Yecora                                  | 1997 | 16b6c824-dd61-4282-8f1d-5a953e1c4c3b |
| <i>Astragalus noziensis</i>     | Volk         | 71/380   | NY   | Afghanistan: Paktia                                     | 1971 | cd8c8704-786b-4f09-b0af-008e91761d04 |
| <i>Astragalus nudisiliquus</i>  | Joyal        | 503      | NY   | United States of America: Oregon:<br>Malheur            | 1984 | d4f2d3d2-95b0-43f7-97e9-84201b4d343f |
| <i>Astragalus nudus</i>         | Marticorena  | 1465     | OS   | Chile: Coquimbo (IV): Ovalle                            | 1971 | e7593fd3-960a-4bb9-a8bf-22c0c174dcf1 |
| <i>Astragalus nutans</i>        | Thorne       | 49,247   | NY   | United States of America:<br>California: San Bernardino | 1977 | d4e62e7d-12ed-4252-ad64-86708e613bd0 |
| <i>Astragalus nutriosensis</i>  | Beasley      | 948      | NY   | United States of America: Arizona:<br>Apache            | 1991 | d4d7e070-6a01-415a-b769-1f6906a44ea4 |
| <i>Astragalus nuttallianus</i>  | Reina        | 2003-514 | CAS  | Mexico: Sonora: Nacozari de<br>Garc <sup>√</sup> ≠a     | 2003 | 16b54691-ad06-4fae-97f7-7428ec6c1610 |
| <i>Astragalus nuttallii</i>     | Tilforth     | 656      | NY   | United States of America:<br>California: Monterey       | 1972 | d5d4301e-8248-487c-baa7-34c69cc24d20 |
| <i>Astragalus nutzotinensis</i> | Cody         | 30320    | NY   | Canada: Yukon Territory                                 | 1982 | d4cc5b57-95d1-41c7-a489-708ec18f4f46 |
| <i>Astragalus nyensis</i>       | Cochrane     | 986      | NY   | United States of America: Nevada:<br>Nye                | 1978 | d4c44052-6cc8-4c1b-8d2f-bef026cd86a1 |
| <i>Astragalus obcordatus</i>    | Herring      | 680      | FLAS | United States of America: Florida:<br>Suwannee          | 1992 | e912d82d-de22-4bce-b7b7-1f972fd4e983 |
| <i>Astragalus obscurus</i>      | Foster       | 11423    | NY   | United States of America: Idaho:<br>Owyhee              | 1997 | d5d215ed-5590-48cc-b1c8-21eb6c216bd6 |
| <i>Astragalus ochrochlorus</i>  | Ledingham    | 4170     | NY   | Islamic Republic of Iran                                | 1965 | cd8af527-5826-461e-b2ce-9a295c14c0af |
| <i>Astragalus odoratus</i>      | USDA-ARS     | 383593   | NY   | Turkey: Erzurum: Yakutiye                               | 1977 | cd88d776-a602-421e-9a6f-6b2c800c4907 |

|                                                                      |             |       |      |                                                      |      |                                      |
|----------------------------------------------------------------------|-------------|-------|------|------------------------------------------------------|------|--------------------------------------|
| <i>Astragalus olchonensis</i>                                        | Bannets     | 337   | NY   | Russian Federation: Siberia                          | 1979 | b0b91ceb-4f64-4df1-a482-9bc304581afd |
| <i>Astragalus oldenburgii</i>                                        | B. Fedtsch  | 6228  | HUH  | Uzbekistan                                           | 1930 | 0179a9e9-aa60-4409-a8eb-af6e864b3d8d |
| <i>Astragalus oleaeifolius</i>                                       | Manakyan    | s.n.  | MO   | Armenia: Ararat                                      | 1997 | 0c36fa66-6ac9-4f58-a459-92be36b09fd2 |
| <i>Astragalus oleaeifolius</i><br>( <i>Astracantha deinacantha</i> ) | Zohary      | 344   | MO   | Not shown                                            | 1935 | 0c1718df-2cab-4a8c-a006-029bed2cf177 |
| <i>Astragalus olgae</i>                                              | Vassiljeva  | 5188  | NY   | Uzbekistan                                           | 1962 | cffba89a-873e-40fc-b09b-2cea19baa069 |
| <i>Astragalus oniciformis</i>                                        | DeBolt      | 1111  | NY   | United States of America: Idaho:<br>Lincoln          | 1989 | d5375268-e432-463c-b970-233fca8cce66 |
| <i>Astragalus onobrychioides</i>                                     | Tzvelev     | 7135  | NY   | Russian Federation: Daghestan:<br>Gunib              | 1961 | aea9e6cf-8e8c-4921-8eac-e01090c9d1b7 |
| <i>Astragalus onobrychis</i>                                         | Krendl      | s.n.  | NY   | Yugoslavia: Makedonija: Debar                        | 1976 | cf676976-7f9b-4dd7-b483-162e9f7be2f3 |
| <i>Astragalus oocalycis</i>                                          | Atwood      | 25653 | NY   | United States of America:<br>Colorado: La Plata      | 2000 | d4b00b6a-94eb-48cb-b6a2-f01e1898748a |
| <i>Astragalus oocarpus</i>                                           | Moran       | 8340  | NY   | United States of America:<br>California: San Diego   | 1960 | d4b5e78e-3f94-41d5-9bbb-13e0db13edd5 |
| <i>Astragalus oophorus</i>                                           | Atwood      | 15474 | FLAS | United States of America: Utah:<br>Juab              | 1991 | e991d56f-ca60-4dda-ad93-4cb0fb8d3cee |
| <i>Astragalus orbiculatus</i>                                        | Hikitin     | s.n.  | HUH  | Kazakhstan: Almaty                                   | 1930 | 01716fe2-7974-48b4-b7c6-59591f895ac3 |
| <i>Astragalus orcuttianus</i>                                        | Harbison    | s.n.  | CAS  | Mexico: Baja California                              | 1951 | 16b14aea-25cb-42ff-b6c1-b8a4d673c60d |
| <i>Astragalus oreganus</i>                                           | Lesica      | 5369  | NY   | United States of America: Montana:<br>Carbon         | 1991 | d530324e-efc5-4df9-9565-3c9279684a1e |
| <i>Astragalus ornithopodioides</i>                                   | Mona        | s.n.  | NY   | Armenia: Yerevan                                     | 1960 | aea878f9-b9d0-4c55-b267-e49077195ddb |
| <i>Astragalus ornithorrhynchus</i>                                   | Goloskokov  | 4418  | NY   | Kazakhstan                                           | 1947 | aea0a78c-b9af-4f48-80b9-90ed5d312d5f |
| <i>Astragalus osterhoutii</i>                                        | Neese       | 17181 | NY   | United States of America:<br>Colorado: Grand         | 1985 | d528fb48-0ef5-4608-a258-04b0054217fb |
| <i>Astragalus oxyglottis</i>                                         | Lachashvili | 447   | NY   | Georgia: East Georgia                                | 2006 | d0aaf4d9-1447-468e-9666-70597a727aad |
| <i>Astragalus oxyphysopsis</i>                                       | Moran       | 23095 | TEX  | Mexico: Baja California                              | 1976 | 02551a79-54b1-4005-8832-fd3072e967fc |
| <i>Astragalus oxyphysus</i>                                          | Moran       | 28353 | CAS  | Mexico: Baja California: Ensenada                    | 1980 | 16b00c1e-46f1-4d27-8c09-88146b41712f |
| <i>Astragalus pachypus</i>                                           | Mistretta   | 1521  | NY   | United States of America:<br>California: Los Angeles | 1995 | d523607c-3ac0-4b76-87c4-d6c1d860b2f6 |
| <i>Astragalus pachyrachis</i>                                        | Volk        | 20    | NY   | Afghanistan: Kabul                                   | 1950 | aad5e993-2f37-41bb-8194-037be123645f |
| <i>Astragalus palenae</i>                                            | O'Donell    | 2384  | NY   | Argentina: Neuquen                                   | 1945 | d13a562a-61ec-4a09-a33d-10a30907169f |
| <i>Astragalus palmeri</i>                                            | Beauchamp   | 2036  | FLAS | United States of America:<br>California: San Diego   | 1971 | e97ff386-dd07-4bd5-9b33-be43948ed26c |

|                                                         |                           |            |      |                                                  |      |                                      |
|---------------------------------------------------------|---------------------------|------------|------|--------------------------------------------------|------|--------------------------------------|
| <i>Astragalus pamirensis</i>                            | Stanjukovicz              | 6266       | HUH  | Tajikistan                                       | 1936 | 0154a316-124c-4a8e-880d-587916a21adf |
| <i>Astragalus panamintensis</i>                         | Niles                     | 5591       | NY   | United States of America: Nevada: Nye            | 1998 | d4ae36d6-1fd4-41de-82c2-8ca8243bf882 |
| <i>Astragalus paposanus</i>                             | Jiles                     | 5394       | OS   | Chile: Antofagasta (II): Antofagasta             | 1969 | e73deb1b-ac93-4197-ab05-4992669943b7 |
| <i>Astragalus pardalinus</i>                            | Welsh                     | 9592       | NY   | United States of America: Utah: Wayne            | 1970 | d519a02a-0105-41b4-b013-6a5d325a6ffb |
| <i>Astragalus parnassi</i>                              | de Fellenberg             | s.n.       | NA   | Greece: Attika                                   | 1863 | e7278a3e-5f74-4c97-a89e-787be6aed369 |
| <i>Astragalus parodii</i>                               | Sayago                    | 815        | NY   | Argentina: Cordoba: El Batan                     | 1952 | d13a1878-3a05-4fa7-850e-ee7750dfcd37 |
| <i>Astragalus parryi</i>                                | Isely                     | 9800       | NY   | United States of America: Wyoming: Albany        | 1965 | d515f796-ac19-478f-baea-03f8a0afcee3 |
| <i>Astragalus parvus</i>                                | McVaugh                   | 16982      | CAS  | Mexico: Jalisco                                  | 1958 | 14d7ec68-3ed3-4662-932e-fcee2f367d6e |
| <i>Astragalus patagonicus</i>                           | [None]                    |            | NY   | Argentina: Santa Cruz: Lago Buenos Aires         | 2017 | d1377632-f24c-4d9c-a28c-f1f039451694 |
| <i>Astragalus pattersonii</i>                           | Patterson                 |            | FLAS | United States of America: Colorado               | 1936 | e97b1679-e99b-4404-b1ef-0e1fe20a6657 |
| <i>Astragalus paucijugus</i>                            | Rusanovich                |            | NY   | Kazakhstan: Alma-Ata: Taukum Sands               | 1984 | d0a269dd-8ec9-42d7-ad48-34c0daca0eb7 |
| <i>Astragalus pauperculus</i>                           | Barneby                   | 11491      | NY   | United States of America: California: Tehama     | 1954 | d4a56123-a80e-42ce-b6ec-3477e62d98f8 |
| <i>Astragalus pavlovii</i>                              | [Cyrillic]                | 6589       | NY   | Mongolia                                         | 1948 | ae96d7e2-d564-40ce-8c48-255038e61535 |
| <i>Astragalus paysonii</i>                              | Holmgren                  | 16590      | NY   | United States of America: Wyoming: Sublette      | 1978 | d49cf7c1-cad9-4e30-bc37-6c8ec00f809b |
| <i>Astragalus peckii</i>                                | Peck                      | 21931      | NY   | United States of America: Oregon: Klamath        | 1943 | d4948adc-548c-4811-acb5-0ab3a4542288 |
| <i>Astragalus pectinatus</i>                            | Moran                     | 426        | FLAS | United States of America: North Dakota: Billings | 1939 | e9410742-2815-4251-9a03-48b86c555896 |
| <i>Astragalus peduncularis</i>                          | Anders                    | 7232       | HUH  | Afghanistan: Badakhshan                          | 1971 | f7bc2efa-1512-46c1-8104-d2de8c869a4b |
| <i>Astragalus peduncularis (Astragalus corydalinus)</i> | Butschantzev V; Butkov. A | 1936 VII 7 | HUH  | Russian Federation                               | 1936 | ff9f67e8-5008-4118-a690-878438e76436 |
| <i>Astragalus pehuenches</i>                            | Marticoarena              | 972        | NA   | Chile: Curico: Curico                            | 1967 | e748e253-55f5-4401-b7ad-2196311396f7 |
| <i>Astragalus pelecinus</i>                             | Raus                      | 9257       | NY   | Greece                                           | 1984 | d0a210d0-6de7-4ce4-ae19-cbea9aad8098 |
| <i>Astragalus pennellianus</i>                          | Breedlove                 | 63019      | CAS  | Mexico: Durango                                  | 1986 | 167e5316-d31f-43ff-b128-f7cba467f996 |
| <i>Astragalus peregrinus</i>                            | Tackholm                  | s.n.       | MO   | Egypt                                            | 1965 | 164eb72e-0e07-4030-919b-8dceb6871476 |
| <i>Astragalus perianus</i>                              | Madsen                    | 1484       | NY   | United States of America: Utah: Piute            | 2002 | d472304a-6fde-46ae-9665-cea46d031ae9 |

|                                                                 |            |          |      |                                                      |      |                                          |
|-----------------------------------------------------------------|------------|----------|------|------------------------------------------------------|------|------------------------------------------|
| <i>Astragalus persepolitianus</i>                               | Volk       | 1690     | NY   | Afghanistan: Kabul                                   | 1950 | aad5639b-4bd4-414c-ae17-552349223f70     |
| <i>Astragalus peruvianus</i>                                    | Casas      | FC 66 40 | NY   | Bolivia (Plurinational State of):<br>Murillo: La Paz | 1982 | d10359d1-bc7e-4430-81a5-e975698fad86     |
| <i>Astragalus peterfii</i>                                      | Peterfi    | s.n.     | NY   | Romania                                              | 1916 | cf683a0b-10b0-465f-944f-4077d597f32e     |
| <i>Astragalus petropylensis</i>                                 | Schischkin | 3323     | NY   | Kazakhstan: East Kazakhstan:<br>Oskemen              | 1931 | ae8219b6-3eac-4c49-a29e-300b37b99cd0     |
| <i>Astragalus phoenix</i>                                       | Beatley    | none     | NY   | United States of America                             | 1970 | d50d564a-7ab5-4b9d-8322-<br>118c420fe380 |
| <i>Astragalus physocarpus</i>                                   | USDA-ARS   | 420687   | NY   | Kazakhstan                                           | 1980 | ae7886ba-1ded-4851-9986-bef679e5f998     |
| <i>Astragalus physodes</i>                                      | Skvortsov  |          | NY   | Russian Federation: Volgograd                        | 1968 | cf6c7976-bab5-41ec-a0ff-8e4d9a7df04b     |
| <i>Astragalus pickeringii</i>                                   | Weigend    | 5471     | NY   | Peru                                                 | 2001 | d0fce35d-b817-4e89-9954-<br>28c3bd247218 |
| <i>Astragalus pictiformis</i>                                   | Barneby    | 18076    | NY   | United States of America: New<br>Mexico: Lincoln     | 1986 | d480d94b-b78f-4b11-ae1f-1125e4fdc40d     |
| <i>Astragalus piletocladus</i>                                  | [Cyrillic] | s.n.     | NY   | Turkmenistan                                         | 1954 | ae7f9296-3dab-4dd4-af6d-6416ff99e125     |
| <i>Astragalus pinetorum</i><br>( <i>Tragacantha declinata</i> ) | [Cyrillic] | s.n.     | MO   | Armenia                                              | 1962 | 0c69abbc-8c6c-4594-8b8b-51dbf4d6d45a     |
| <i>Astragalus pinetorum</i>                                     | Samuelsson | 2256     | NY   | Lebanon                                              | 1932 | aad0a9ce-b2ea-4d61-857e-d7b0fb40b5bf     |
| <i>Astragalus pinonis</i>                                       | Atwood     | 20824    | NY   | United States of America: Arizona:<br>Coconino       | 1996 | d49278c5-6412-4357-83f9-<br>84b8e7712085 |
| <i>Astragalus piscator</i>                                      | Barneby    | 17808    | NY   | United States of America: Utah:<br>Grand             | 1982 | d4716456-ac22-4429-b0e8-c15ba3285df5     |
| <i>Astragalus piscinus</i>                                      | Raven      | 12564    | CAS  | Mexico: Baja California: Ensenada                    | 1958 | 16ab185c-516b-4211-bdfa-5e21dbc8000b     |
| <i>Astragalus pissisi</i>                                       | Ricardi    |          | NA   | Chile: Coquimbo (IV): Choapa                         | 1952 | e742cecb-e006-4908-940a-8d441ca57f70     |
| <i>Astragalus piutensis</i>                                     | Tiehm      | 9474     | NY   | United States of America: Nevada:<br>White Pine      | 1985 | d4912524-49ed-4d20-ab17-d3ea2e0c255f     |
| <i>Astragalus plattensis</i>                                    | Wheless    | 15       | FLAS | United States of America: Texas:<br>Eastland         | 1966 | e93fce93-959a-4f20-9888-a7b05ae2a7b7     |
| <i>Astragalus platyphyllus</i>                                  | Ishmayaova | 1746     | NY   | Kazakhstan                                           | 1970 | ae7c2716-4bb9-4cdd-baec-20db4293e093     |
| <i>Astragalus platysematius</i>                                 | USDA-ARS   | 380721   | NY   | Islamic Republic of Iran: Zadabeh:<br>Unknown        | 1979 | aacb0391-632f-4ff3-8015-0a7111fc6145     |
| <i>Astragalus platytropis</i>                                   | Packard    | 79-215   | NY   | United States of America: Oregon:<br>Malheur         | 1979 | d481b244-eba8-4935-8847-<br>2582332b85f9 |
| <i>Astragalus plumosus</i>                                      | Lambert    | 621      | NY   | Turkey                                               | 1968 | aac3f097-1c40-41fd-8b36-4da68b04ff91     |
| <i>Astragalus podolobus</i>                                     | Ladingham  | 4098     | NY   | Islamic Republic of Iran                             | 1965 | aac334fe-1694-4d82-b756-e64214762a2d     |



|                                      |                             |           |     |                                                  |      |                                      |
|--------------------------------------|-----------------------------|-----------|-----|--------------------------------------------------|------|--------------------------------------|
| <i>Astragalus polaris</i>            | Astragalus<br>Polaris Benth | 535       | NY  | United States of America: Not shown              | 1975 | ae747978-4d46-49be-86a6-73278be85e08 |
| <i>Astragalus polyacanthus</i>       | Webster                     | 6087      | HUH | India: Kashmir                                   | 1955 | f7b32493-d705-4ccb-ae6c-4dda36ae533d |
| <i>Astragalus polybotrys</i>         | Ledingham                   | 5277      | NY  | Canada: Saskatchewan                             | 1970 | aa9d2e93-f052-4e05-80ed-a58967643530 |
| <i>Astragalus pomonensis</i>         | Howell                      | 31085     | CAS | Mexico: Baja California                          | 1956 | 16a96aa9-20c4-4883-b8b5-243ca4f7ce2d |
| <i>Astragalus ponticus</i>           | Akinfiev                    | 1800      | NY  | Ukraine: Dnepropetrovsk                          | 1906 | cf6daeed-e72e-4b99-a49c-814c76f7b030 |
| <i>Astragalus porrectus</i>          | Tiehm                       | 4281      | NY  | United States of America: Nevada: Pershing       | 1978 | d46fdec5-4343-422d-8371-795cd7a54d03 |
| <i>Astragalus praelongus</i>         | Atwood                      | 23622     | NY  | United States of America: Colorado: San Miguel   | 1998 | d56eee88-264d-4b09-a656-fa2d2ae151fa |
| <i>Astragalus preussii</i>           | Neese                       | 16778     | NY  | United States of America: Arizona: Coconino      | 1985 | d462e850-8ed1-42f3-ba67-154e98617503 |
| <i>Astragalus prorifer</i>           | Boyd                        | 2793      | NA  | Mexico: Baja California: Sierra San Pedro Martir | 1988 | 16a95a1b-69e5-4ad9-b064-fc262b422314 |
| <i>Astragalus proximus</i>           | Barneby                     | 17795     | NY  | United States of America: New Mexico: San Juan   | 1982 | d45babaf-8762-4492-b7e3-235353c14feb |
| <i>Astragalus przewalskii</i>        | Boufford                    | 36686     | HUH | People's Republic of China: Sichuan              | 2006 | 009cf286-56e7-4f0b-b595-897d50127858 |
| <i>Astragalus pseudoadsurgens</i>    | Maltzev                     | 7333      | HUH | Russian Federation: Irkutsk: Ust-Uda             | 1964 | 00699996-f908-4284-96a2-b5db4c644b88 |
| <i>Astragalus pseudocyclophyllus</i> | Rechinger                   | 309       | NY  | Russian Federation: Stavropol Krai               | 1949 | aac03dcf-f334-4eda-a3fe-1a6e66b52972 |
| <i>Astragalus pseudocytisoides</i>   | Bajtenov                    | 5378      | NY  | Kazakhstan                                       | 1967 | ae62f62f-0856-4408-8217-9f2352de1723 |
| <i>Astragalus pseudomegalomerus</i>  | Botschantzev                |           | HUH | Uzbekistan                                       | 1936 | 00f724b2-4f02-40e3-b59d-5c3cfa333c6e |
| <i>Astragalus pseudonobilis</i>      | Rajkova                     | 6232a     | HUH | Uzbekistan                                       | 1926 | 00efe10e-c18e-4341-aba8-9df3cb985fc0 |
| <i>Astragalus pseudoparrowianus</i>  | Rechinger fil.              | 988       | NY  | Islamic Republic of Iran                         | 1937 | aab0393a-37ed-443a-9325-0a030efacf80 |
| <i>Astragalus pseudoutriger</i>      | Petunnikovy                 | 3720      | NY  | Azerbaijan                                       | 1910 | cf7109f5-8bb3-4a8e-a639-fa8d91b979a8 |
| <i>Astragalus psilacanthus</i>       | Lamond                      | 2442      | NY  | Afghanistan: Paktia                              | 1965 | aaa230d9-87ce-41d4-b197-7e8e1476aad2 |
| <i>Astragalus psilocentros</i>       | Stewart                     | 23607     | NY  | Pakistan: Punjab                                 | 1949 | aaa96a17-b7c5-459b-9844-06b0df2e9e05 |
| <i>Astragalus pterocarpus</i>        | Tiehm                       | 16050     | NY  | United States of America: Nevada: Humboldt       | 2010 | d56ee106-5c36-4d5c-86a0-03dbab666e6a |
| <i>Astragalus pterocephalus</i>      | Belolipov                   | UPL_00396 | MO  | Uzbekistan: Djizak: Bahmal                       | 2005 | 0c5ccf8d-890b-490c-8201-6db4ce9247b7 |
| <i>Astragalus pubentissimus</i>      | Goodrich                    | 1473      | NY  | United States of America: Wyoming: Sweetwater    | 1973 | d459b698-c212-47fd-bcf7-895b729ce9dc |
| <i>Astragalus puberulus</i>          | Cronquist                   | 12151     | NY  | Russian Federation: Altai                        | 1988 | ae616acd-e14f-4feb-aa5b-d1a41cb117c9 |

|                                   |                |         |      |                                                 |      |                                      |
|-----------------------------------|----------------|---------|------|-------------------------------------------------|------|--------------------------------------|
| <i>Astragalus pullus</i>          | Boufford       | 28432   | HUH  | People's Republic of China                      | 1998 | 00d5c748-f651-496e-9a60-fb578922e0c0 |
| <i>Astragalus pulsiferae</i>      | Schoolcraft    | 385     | NY   | United States of America:<br>California: Modoc  | 1981 | d56e81c0-2d1b-4c97-8867-50d4bb0cc9e5 |
| <i>Astragalus punae</i>           | M√[lgura       | 1272    | NY   | Argentina: Jujuy: Susques                       | 1994 | d1301124-9cf5-44e9-a442-aff58e5064b4 |
| <i>Astragalus punctatus</i>       | Grossheim      | 233     | NY   | Islamic Republic of Iran: East<br>Azerbaijan    | 1924 | af6b4283-fda8-4413-86cd-720d974371d7 |
| <i>Astragalus puniceus</i>        | Spellenberg    | 4976    | NY   | United States of America: New<br>Mexico: Taos   | 1978 | d56367f1-f3aa-4493-b3f8-535cce698214 |
| <i>Astragalus purshii</i>         | Neely          | 4190    | NY   | United States of America:<br>Colorado: Moffat   | 1987 | d454bd53-46e5-47cd-a88a-113b25888dfb |
| <i>Astragalus pusillus</i>        | Solomon        | 16211   | NY   | Bolivia (Plurinational State of)                | 1987 | d12c1297-1b05-4d53-84c9-60c5b2128da5 |
| <i>Astragalus pycnostachyus</i>   | Constance      | 2523    | NY   | United States of America:<br>California: Marin  | 1939 | d5600e08-7de0-45aa-867e-00237bfb2704 |
| <i>Astragalus quisqualis</i>      | [Cyrillic]     |         | HUH  | [Cyrillic]                                      | 1965 | 009612ca-8605-4c41-bbc0-71b7ff8b5e01 |
| <i>Astragalus racemosus</i>       | Goodrich       | 23331   | FLAS | United States of America: Utah:<br>Uintah       | 1991 | e93b0012-c2e3-4418-b16b-220d4d9f4989 |
| <i>Astragalus raddei</i>          | Litvinov       | 1231    | NY   | Turkmenistan                                    | 1898 | af584e6d-2926-4c34-877b-9af3a2fbd6d7 |
| <i>Astragalus rafaelensis</i>     | Shultz         | 2502    | NY   | United States of America: Utah:<br>Emery        | 1978 | d44d808b-e9b9-440a-a8ac-5488082f5a07 |
| <i>Astragalus rattanii</i>        | Halse          | 8764    | NY   | United States of America:<br>California: Colusa | 2013 | d4415fe8-5dc9-44e4-bfb1-dd76eb4f4bb5 |
| <i>Astragalus recurvus</i>        | Imdorf         | 1221    | NY   | United States of America: Arizona:<br>Gila      | 1993 | d44107cf-c00d-4d50-86eb-3120e1ee1ed0 |
| <i>Astragalus reduncus</i>        | Sagalaev       | s.n.    | NY   | Russian Federation: Volgograd:<br>Svetloyarsky  | 1993 | cf81a944-c83f-4743-9b66-01a1e62873b2 |
| <i>Astragalus reflexistipulus</i> | Yokoyama       | 9872501 | HUH  | Japan: Yamagata Prefecture                      | 1998 | 00951840-8ffd-434b-84f8-60919cabf9e8 |
| <i>Astragalus reflexus</i>        | Simon E. Wolff | 2877    | NY   | United States of America: Texas:<br>Bell        | 1931 | d431af25-613e-4c87-b124-119805c1d21a |
| <i>Astragalus refractus</i>       | USDA-ARS       | 384801  | NY   | Islamic Republic of Iran                        | 1977 | aa9a5ff9-f58f-4d3c-bde6-f012aec27350 |
| <i>Astragalus remotiflorus</i>    | Assadi         | 1775    | NY   | Islamic Republic of Iran: Kerman:<br>Baft       | 1977 | af54ec47-2d86-4845-b506-4e957535bb19 |
| <i>Astragalus remotus</i>         | Pinzl          | 11228   | NY   | United States of America: Nevada:<br>Clark      | 1995 | d55d205c-d416-4add-9625-51b2aec9c758 |
| <i>Astragalus retamocarpus</i>    | Michelson      | 3324    | NY   | Uzbekistan: Samarqand                           | 1913 | af52aabf-ee34-45ad-ada2-87bbf6406c20 |
| <i>Astragalus reticulatus</i>     | Roshewitz      | 382     | NY   | Kazakhstan                                      | 1926 | b02e67cb-801d-46c9-a897-d969cb4b513c |

|                                   |               |         |      |                                                       |      |                                          |
|-----------------------------------|---------------|---------|------|-------------------------------------------------------|------|------------------------------------------|
| <i>Astragalus reuterianus</i>     | Assadi        | 1698    | NY   | Islamic Republic of Iran: Kerman:<br>Baft             | 1977 | aa94d172-4003-4921-9de4-e43c5ccc2dd8     |
| <i>Astragalus reventiformis</i>   | Chamberlain   | 1265765 | NY   | United States of America:<br>Washington: Klickitat    | 1980 | d555e9b8-e953-487a-8471-<br>b1d72eb76986 |
| <i>Astragalus reventus</i>        | Larry Hufford | 1192    | NY   | United States of America:<br>Washington: Garfield     | 1996 | d5522bbf-cfb3-4ac3-8b1d-57a9da056e14     |
| <i>Astragalus rhacodes</i>        | [Cyrillic]    | 714     | HUH  | [Cyrillic]                                            | 1960 | 0090d966-d9fd-4fbb-a015-1b0a4551c308     |
| <i>Astragalus rhizanthus</i>      | Webster       | 6349    | HUH  | Pakistan: Kashmir: Baltistan                          | 1955 | fc40d59f-a4f6-449f-a612-3c1dea13c5a9     |
| <i>Astragalus rhizocephalus</i>   | Volk          | 2752    | NY   | Afghanistan: Bamian                                   | 1952 | cd7662de-73dd-445b-99b6-<br>c5ba3090e234 |
| <i>Astragalus richii</i>          | Leiva         | 1155    | NY   | Peru: Otuzco: La Libertad                             | 1994 | d23bbac6-3363-4720-bd6d-<br>7a4b7283c873 |
| <i>Astragalus ripleyi</i>         | Weber         | 7788    | FLAS | United States of America:<br>Colorado: Conejos        | 1952 | e9382f96-2850-4701-9840-<br>4ddc382107e6 |
| <i>Astragalus robbinsii</i>       | Kierstead     | 84-28   | NY   | United States of America: Oregon:<br>Wallowa          | 1984 | d42d5002-4f63-493f-a3b2-665975825fe3     |
| <i>Astragalus robustus</i>        | Takhtajan     | s.n.    | NY   | Armenia                                               | 1960 | b02a95bd-3b63-4689-8cf4-0bfed6019b42     |
| <i>Astragalus roemeri</i>         | Ledingham     | 5264    | NY   | Czech Republic                                        | 1970 | cf9112f3-27e4-4ff3-9db7-a409dd6970d0     |
| <i>Astragalus romasanus</i>       | Hoffmann      | 170     | TEX  | Peru                                                  | 1960 | 20cd213b-095d-4843-9825-e0fd0edebcac     |
| <i>Astragalus roseus</i>          | Schischkin    | s.n.    | NY   | Kazakhstan: East Kazakhstan:<br>Oskemen               | 1931 | b02a8e16-8144-426c-bda2-8f2da88b5065     |
| <i>Astragalus rubrifolius</i>     | Butkov        | 6236    | NY   | Turkmenistan                                          | 1930 | b0236ce0-2754-4daa-95e3-976eb1e2848a     |
| <i>Astragalus rubromarginatus</i> | Korovin       | 365     | NY   | Turkmenistan                                          | 1925 | b0295514-a83a-482e-ad4b-<br>488299548448 |
| <i>Astragalus rubtzovii</i>       | Aristangaliev | 4820    | HUH  | Kazakhstan                                            | 1963 | 008a54c8-4051-4b77-afd2-e0be2519a7c4     |
| <i>Astragalus ruiz-lealii</i>     | Covas         | 3059    | NY   | Argentina: Mendoza: Las Heras                         | 1944 | d23b0c40-f18b-4741-9b43-<br>75d12b8bab09 |
| <i>Astragalus rupifragus</i>      | Skvortsov     | s.n.    | NY   | Russian Federation: Saratov:<br>Hvalynsk              | 1993 | cf777972-6ed2-4d13-9230-608f79bee691     |
| <i>Astragalus rusbyi</i>          | Isely         | 10815   | NY   | United States of America: Arizona:<br>Coconino        | 1969 | d5511611-0bc2-443b-8316-<br>b927020c1c62 |
| <i>Astragalus ruscifolius</i>     | USDA-ARS      | 384744  | NY   | Islamic Republic of Iran                              | 1977 | ce7a63c7-fcef-452e-8d4d-88008d47a972     |
| <i>Astragalus sabulonum</i>       | Felger        | 92-221  | CAS  | Mexico: Sonora: San Luis R <sup>v</sup> o<br>Colorado | 1992 | 169fa003-281c-4e59-a836-5e949faf7a52     |
| <i>Astragalus sabulosus</i>       | Welsh         | 4021    | NY   | United States of America: Utah:<br>Grand              | 1965 | d42b9f80-a4b0-479d-be76-5748c6e8cc40     |

|                                    |              |            |     |                                                         |      |                                      |
|------------------------------------|--------------|------------|-----|---------------------------------------------------------|------|--------------------------------------|
| <i>Astragalus sachalinensis</i>    | Pavlova      | 5970       | NY  | Russian Federation: Sakhalin: Alexandrovsk-Sakhalinsky  | 1978 | ae121256-56f2-4840-971d-dce335482eaf |
| <i>Astragalus salmonis</i>         | Tiehm        | 12852      | NY  | United States of America: Nevada                        | 1999 | d42b6086-494b-4589-b7bd-b55738d62f70 |
| <i>Astragalus sanctae-crucis</i>   | Hicken       | SI 7524    | NY  | Argentina: Buenos Aires: Partido del General Pueyrredón | 1932 | d0e07e87-1ce8-4895-97fa-92a0733768ce |
| <i>Astragalus sanctorum</i>        | Moran        | 15929      | TEX | Mexico: Baja California                                 | 1969 | 20e9ca4f-a182-4adf-919a-eb6c671e22b5 |
| <i>Astragalus sanguineus</i>       | Thompson     | 524        | CAS | Mexico: Coahuila                                        | 1983 | 1643c244-1682-4956-8d54-f4f909fe9348 |
| <i>Astragalus saurinus</i>         | Atwood       | 31216      | NY  | United States of America: Utah: Uintah                  | 2005 | d425846d-ef0b-425b-acf5-8a59b74d2c02 |
| <i>Astragalus saxifractor</i>      | Podlech      | 17775      | NY  | Afghanistan: Kabul                                      | 1970 | ce79fde7-d587-4ab7-b4f8-73437f5090cc |
| <i>Astragalus scaberrimus</i>      | Guo          | 1504049    | HUH | People's Republic of China: Shandong: Qufu              | 2004 | 006b049a-8de8-4881-89e0-dc7db5ff6e1a |
| <i>Astragalus scaphoides</i>       | Henderson    | 3733       | NY  | United States of America: Idaho                         | 1977 | d40bee28-5b2a-4bf7-a3d0-7eed3cc6ff6c |
| <i>Astragalus schachdarinus</i>    | Anders       | 7233       | HUH | Afghanistan: Badakhshan                                 | 1971 | f7b0f5c1-92c0-4202-8b93-ab6d4f355300 |
| <i>Astragalus schahrudensis</i>    | Nikitin      |            | NY  | Turkmenistan: Ashgabat                                  | 1975 | ae0e2c48-ca97-4d4f-b735-56544160a1f6 |
| <i>Astragalus schanginianus</i>    | Goloskokov   | 4419       | NY  | Kazakhstan                                              | 1959 | ae0d4401-a3df-41f8-b9fe-40a3b42143e4 |
| <i>Astragalus scheremetevianus</i> | Gusev        | 4580       | NY  | Tajikistan: Gorno-Badakhshan                            | 1958 | adf422ec-8258-4393-9af0-16cc88bfd37b |
| <i>Astragalus schimperi</i>        | Barkley      | 33Ir5304   | NY  | Iraq: Al Anbar                                          | 1963 | ce752161-59c3-4d36-92d3-4e4a2c3f9e71 |
| <i>Astragalus schistocalyx</i>     | Assadi       | 2131       | NY  | Islamic Republic of Iran: Kerman                        | 1977 | d54e75e4-19b3-47f5-bd4e-38967e67e65e |
| <i>Astragalus schmalhauseni</i>    | Vaisk        | 152        | NY  | People's Republic of China                              | 1989 | ade600df-120f-424f-b8d1-e1f5358b443b |
| <i>Astragalus schrenkianus</i>     | Bajtenov     | 5773       | HUH | Kazakhstan                                              | 1963 | 00e462f3-4037-46fe-9f65-f7eda14bb6ad |
| <i>Astragalus schugnanicus</i>     | [Cyrillic]   | 188        | NY  | [Cyrillic]                                              | 1959 | ad288896-1b64-4f52-b51f-4dce1f511147 |
| <i>Astragalus scleroxylon</i>      | Botschantzev | 6238a      | HUH | Uzbekistan: Bukhara                                     | 1937 | 009cca2c-e074-400b-970b-284a5f5e6762 |
| <i>Astragalus scoparius</i>        | Goloskokov   | 4420       | NY  | Kazakhstan: Almaty                                      | 1959 | ad272d51-3435-4317-8de6-b7ecc7abf0f7 |
| <i>Astragalus scopulorum</i>       | Franklin MA  | 6530       | NY  | United States of America: Utah: Utah                    | 1989 | d3f44e6b-d7d5-4358-9d5d-dbd2c69fba34 |
| <i>Astragalus scorpiurus</i>       | Stewart      | 23,604     | NY  | Pakistan: Punjab: Attock                                | 1949 | aaa90af4-98bc-4ed1-9c37-d9294afe0642 |
| <i>Astragalus scutaneus</i>        | Holmes       | CES-338    | TEX | Mexico: Jalisco: Chapala                                | 1998 | 20e57763-2dab-418e-828e-07261f4dfdab |
| <i>Astragalus semenovii</i>        | Goloskokov   | 4128       | NY  | Kazakhstan                                              | 1955 | ad1e4201-94a2-4763-94ad-4cc6cd196540 |
| <i>Astragalus sempervirens</i>     | Echevarria   | MAF 154466 | TEX | Spain: Madrid                                           | 1996 | 20b84e9b-29d1-431d-bbd9-038eb9e32d6b |

|                                  |            |        |     |                                                  |      |                                          |
|----------------------------------|------------|--------|-----|--------------------------------------------------|------|------------------------------------------|
| <i>Astragalus sepultipes</i>     | DeDecker   | 5930   | NY  | United States of America:<br>California: Inyo    | 1987 | d3eb5c09-0672-4ce2-adb2-3d39a5a2f2d2     |
| <i>Astragalus serenoii</i>       | Tiehm      | 14965  | NY  | United States of America: Nevada:<br>Churchill   | 2005 | d41a5915-c0dc-4b8a-a6eb-3fe52e9a8283     |
| <i>Astragalus serpens</i>        | Atwood     | 11796  | NY  | United States of America: Utah:<br>Wayne         | 1985 | d3e2f51c-2296-4afa-b5b5-f386fd60c83f     |
| <i>Astragalus sesameus</i>       | Miller     | 283    | MO  | Morocco: SW                                      | 1974 | 163fb5e0-6d45-4ef9-9f21-f81b6d260c14     |
| <i>Astragalus sesamoides</i>     | Goloskokov | 4471   | NY  | Kazakhstan: Zhambyl                              | 1963 | ad15d5cb-ef03-432c-8c62-45be3a8000dc     |
| <i>Astragalus sesquiflorus</i>   | Holmgren   | 10,641 | NY  | United States of America: Utah:<br>San Juan      | 1954 | d3d0638c-6538-483c-9071-<br>2227281dbc9b |
| <i>Astragalus setulosus</i>      | USDA-ARS   | 383597 | NY  | Turkey: Nidgen Permenial: Forty km               |      | aa63dc51-4ae8-4854-bf9f-1850fedb03b3     |
| <i>Astragalus sevangensis</i>    | Sytin      | 6535   | NY  | Armenia: Gegharkunik                             | 1981 | d0914b68-17ed-4423-80ba-<br>cc0158701cbc |
| <i>Astragalus sewertzovii</i>    | Czerepanov | 7068   | NY  | Tajikistan: Sughd                                | 1965 | ad0e8c1d-be9c-4f01-b408-2c53d047d4d2     |
| <i>Astragalus shagalensis</i>    | Sytin      |        | NY  | Armenia: Lori                                    | 1981 | d08841a1-9a7b-4049-b7af-833364f9e830     |
| <i>Astragalus sheldonii</i>      | Gray       | 5221   | NY  | United States of America: Idaho:<br>Nez Perce    | 2005 | d37c2128-e540-4592-a3b8-<br>5cda78b09253 |
| <i>Astragalus shevockii</i>      | Shevock    | 5633   | NY  | United States of America:<br>California: Tulare  | 1977 | d3784f3a-cc4e-411a-bcf0-2718c0f225fd     |
| <i>Astragalus shinanensis</i>    | Furuse     | s.n.   | HUH | Japan: Shinano: Nagano                           | 1962 | 007d2455-ddce-484e-9486-<br>448a49a2817d |
| <i>Astragalus shortianus</i>     | Elliott    | 6701   | NY  | United States of America:<br>Colorado: Chaffee   | 1999 | d3ccd8a6-7454-459e-8255-8c3db8fabf93     |
| <i>Astragalus shultziorum</i>    | Lichvar    | 3926   | NY  | United States of America:<br>Wyoming: Lincoln    | 1980 | d2e3f7c3-57ed-49e1-ba84-a8fece70c9c0     |
| <i>Astragalus siahderrensis</i>  | Lamond     | 2421   | NY  | Afghanistan: Paktia: Gardez                      | 1965 | aa49d71c-3f10-49ca-9802-ced5c79bde5b     |
| <i>Astragalus sieberi</i>        | Ledingham  | 3469   | NY  | Canada: Saskatchewan                             | 1962 | d03499f1-d5f5-4e1a-bcd6-e8cfc07abed7     |
| <i>Astragalus sieversianus</i>   | [Cyrillic] | s.n.   | NY  | Russian Federation                               | 1975 | acf49d98-cee8-4676-b922-6689f76e1a70     |
| <i>Astragalus sikokianus</i>     | Kim        |        | NY  | Korea (Republic of)                              | 2003 | acefc368-d4b2-4700-a1d3-c587c36d8188     |
| <i>Astragalus siliceus</i>       | Barneby    | 17870  | NY  | United States of America: New<br>Mexico: Tarrant | 1983 | d3bd1d1a-39c1-433b-bbd0-<br>aee50ed159d7 |
| <i>Astragalus siliquosus</i>     | Bleak      | 330696 | NY  | Islamic Republic of IranMalayer                  | 1974 | aa5e2172-b180-434e-8cbf-2fed9fe3c916     |
| <i>Astragalus simplicifolius</i> | Lichvar    | 2722   | NY  | United States of America:<br>Wyoming: Fremont    | 1980 | d37167cf-2f63-4856-91c7-99856c8bcf30     |
| <i>Astragalus sinicus</i>        | Sakiya     | 42     | NY  | Japan                                            | 2004 | ace8aa15-d0ba-48d1-8968-7f69f8f909b4     |

|                                                     |             |            |      |                                                       |      |                                      |
|-----------------------------------------------------|-------------|------------|------|-------------------------------------------------------|------|--------------------------------------|
| <i>Astragalus sinuatus</i>                          | Spellenberg | 1651       | NY   | United States of America: Washington: Chelan          | 1967 | d2f5d646-68a3-48ae-ba0a-a0cac6fd7d83 |
| <i>Astragalus skorniakowi</i>                       | Ledingham   | 3676       | NY   | Canada: Saskatchewan                                  | 1964 | acdebd89-6212-49f6-9914-b5a19e7c1c83 |
| <i>Astragalus skythropos</i>                        | Boufford    | 26916      | NY   | People's Republic of China: Qinghai: Chindu Xian      | 1995 | acd8b177-7dbc-4999-865b-4dfcfa0bac91 |
| <i>Astragalus solandri</i>                          | Podlech     | 53637      | MO   | Morocco: Tiznit                                       | 1997 | 165474bb-5e1e-455f-9980-c271e8d7fa7b |
| <i>Astragalus solitarius</i>                        | Packard     | 79-35      | NY   | United States of America: Oregon: Malheur             | 1979 | d36b240f-a374-4c2d-a1e1-6d1734b53463 |
| <i>Astragalus somcheticus (Astragalus demetrii)</i> | Bleak       | 314060-061 | NY   | Russian Federation: Stavropol Krai                    | 1974 | cf35c2e-0999-4944-b919-9325d7817bca  |
| <i>Astragalus somcheticus (Astragalus polygala)</i> | Cuba        | s.n.       | NY   | Russian Federation: Caucasus                          | 1980 | ae66b316-0f60-4a60-9544-e8ff826b3a2c |
| <i>Astragalus sophoroides</i>                       | Atwood      | 25368      | NY   | United States of America                              | 2000 | d35f9e39-5bc4-46ad-8aff-eb393db037f3 |
| <i>Astragalus soxmaniorum</i>                       | Givens      | 3564       | FLAS | United States of America: Louisiana: Caddo            | 1984 | ea7d2782-d7da-46bb-947b-32b07aeb1b08 |
| <i>Astragalus spachianus</i>                        | Barneby     | 184        | NY   | Islamic Republic of Iran                              | 1977 | aa5ca764-38ae-41dd-b384-7a4dbf08374b |
| <i>Astragalus spaldingii</i>                        | Joyal       | 1173       | NY   | United States of America: Oregon: Baker               | 1986 | d2f5892b-61f8-400c-872d-b12ee87f6adf |
| <i>Astragalus sparsiflorus</i>                      | Weber       | 13294      | NY   | United States of America: Colorado: El Paso           | 1967 | d34b2023-2f4b-4b36-b949-605565340213 |
| <i>Astragalus spatulatus</i>                        | Isely       | 9753       | NY   | United States of America: North Dakota: Golden Valley | 1965 | d2eca01b-c4e0-46e5-8c89-ef47a331fc32 |
| <i>Astragalus speirocarpus</i>                      | Hufford     | 2716       | NY   | United States of America: Washington: Kittitas        | 1998 | d2eaf5c9-79de-4d7e-9962-2ca139f560c7 |
| <i>Astragalus spinosus</i>                          | Fagerstrom  | 220        | NY   | Saudi Arabia: Riyadh: Sadus                           | 1979 | cd94670c-aaf0-47e3-9857-76d168972455 |
| <i>Astragalus sprucei</i>                           | Iltis       | E-559      | NY   | Ecuador: Chimborazo                                   | 1977 | d1e17c85-fe5d-4277-abf3-383edc090048 |
| <i>Astragalus squarrosus</i>                        | Popov       | 6239       | HUH  | Turkmenistan: Balkan                                  | 1931 | 00702fb4-6294-4022-8f95-cbe2e3b54f3d |
| <i>Astragalus stalinskyi</i>                        | Rasulova    | 350        | NY   | Tajikistan: Sughd                                     | 1955 | ad7a375c-292f-413a-9939-81a7961b012d |
| <i>Astragalus stella</i>                            | Miller      | 549        | MO   | Morocco: SW                                           | 1974 | 16412939-c849-451d-b421-7789ecf78d61 |
| <i>Astragalus stevenianus</i>                       | Lachashvili | 352        | NY   | Georgia: Kakheti: Dedoplistskaro                      | 2006 | d0692ca5-ff85-4d2f-aebe-6be607de0233 |
| <i>Astragalus stewartii</i>                         | Stewart     | 22631      | NY   | India: Kashmir                                        | 1946 | aafe44f8-b3bf-4254-9ed0-be83754d0277 |
| <i>Astragalus stipulatus</i>                        | Ohashi      | 771423     | HUH  | Nepal                                                 | 1977 | f7d15a5b-1c52-4916-bb5e-a1015eaf5b94 |
| <i>Astragalus stocksii</i>                          | Anders      | 8792       | NY   | Afghanistan: Kandahar                                 | 1972 | aa8b360f-1489-40ee-b8c9-d6215ab20090 |
| <i>Astragalus straturensis</i>                      | Atwood      | 4909       | NY   | United States of America: Utah: Washington            | 1973 | d342979e-417f-46ad-9f41-18b837920cd4 |

|                                                     |             |          |     |                                              |      |                                      |
|-----------------------------------------------------|-------------|----------|-----|----------------------------------------------|------|--------------------------------------|
| <i>Astragalus striatiflorus</i>                     | Atwood      | 23915    | NY  | United States of America: Utah: Kane         | 1998 | d2e3de91-437d-4175-b109-2506fc511e7e |
| <i>Astragalus strictus</i>                          | Leta Kharka | 20105042 | HUH | Nepal: Dhawalagiri: Mustang                  | 2001 | fc6c2e41-4d5f-4e19-a071-972af95bdb07 |
| <i>Astragalus subcinereus</i>                       | Higgins     | 26026    | NY  | United States of America: Arizona: Coconino  | 2004 | d2dba836-f8f3-4b3c-898e-a179d79ef4bc |
| <i>Astragalus suberosus</i>                         | Samuelsson  | 3677     | NY  | Syrian Arab Republic                         | 1933 | a9dc964b-4ec8-4bfb-ba3f-13f70c73c01e |
| <i>Astragalus submitis</i>                          | Ledingham   | 4058     | NY  | Islamic Republic of Iran: Tehran             | 1965 | a9ef9b33-adac-4d1e-b405-f60b296aa686 |
| <i>Astragalus substipitatus</i>                     | Vasak       | s.n.     | NY  | Tajikistan                                   | 1900 | ad78b8d1-5916-4d42-933a-5cd5ccd7cfed |
| <i>Astragalus subuliformis</i>                      | Singh       | 4227     | NY  | India: Ladakh                                | 1972 | a9ed6de2-d2e9-4a78-802a-a6588e664937 |
| <i>Astragalus subumbellatus</i>                     | Ledingham   | 4048     | NY  | Canada: Saskatchewan                         | 1965 | ac65f99d-505a-4a9e-a1b2-15a0d8e2d40e |
| <i>Astragalus subvestitus</i>                       | Twisselmann | 17286    | NY  | United States of America: California: Tulare | 1970 | d2ce2520-9239-4192-8527-2632fb1f172d |
| <i>Astragalus suffalcatus</i>                       | USDA-ARS    | 380723   | NY  | Islamic Republic of Iran                     | 1977 | a9ea32c5-8a91-470c-869c-20a83e14efcc |
| <i>Astragalus sulcatus</i>                          | [Cyrillic]  |          | HUH | Russian Federation                           | 1967 | fead2a20-af8e-4f68-b381-32770fc4b9f1 |
| <i>Astragalus sumbari</i>                           | [Cyrillic]  |          | NY  | Turkmenistan                                 | 1975 | ad76ac6a-4d7f-47f3-bc82-20ab19cd0505 |
| <i>Astragalus sungpanensis</i>                      | Podlech     | 34562    | HUH | People's Republic of China                   | 2005 | fe52f1db-4281-4268-9305-a0fd79e0edfd |
| <i>Astragalus susianus</i>                          | Ledingham   | 4081     | NY  | Islamic Republic of Iran                     | 1965 | a9e7f920-2a31-4fe0-a809-2eb96ac09ff1 |
| <i>Astragalus szovitsii</i>                         | Barkworth   | s.n.     | NY  | Armenia: Ararat: Ararat                      | 2003 | d06769f4-f6dd-4803-97c3-a01f4e1369aa |
| <i>Astragalus tabrizianus</i>                       | Grant       | 16283    | MO  | Islamic Republic of Iran: East Azerbaijan    | 1964 | 0c657308-17d2-46a5-8a1e-f407795a455d |
| <i>Astragalus takharensis</i>                       | Anders      | 6770     | NY  | Afghanistan: Takhar                          | 1971 | a95c346b-20b2-43ac-a9d8-553ef24bd910 |
| <i>Astragalus tarijensis</i>                        | Ledingham   | 4489     | NY  | Argentina                                    | 1966 | d1d6c4b8-f3d1-4123-a6d0-25d23baef610 |
| <i>Astragalus taschkendicus</i>                     | Podlech     | 30156    | NY  | Afghanistan: Takhar: Farkhar                 | 1977 | a9576c0f-eb44-4b53-96c7-0831cf466ee4 |
| <i>Astragalus tatjanae</i>                          | Anders      | 5650     | HUH | Afghanistan                                  | 1971 | fc698b5a-5862-424f-ae88-cc28201913b0 |
| <i>Astragalus tegetarioides</i>                     | Meinke      | 6086     | NY  | United States of America: Oregon: Harney     | 1991 | d33b4fcb-456f-4c68-a267-189f7b99fcbc |
| <i>Astragalus tegetarioides (Astragalus anxius)</i> | Nelson      | 5988     | NY  | United States of America: California: Lassen | 1980 | d5fbce34-5c78-436a-a250-cdaed1c2fc51 |
| <i>Astragalus teheranicus</i>                       | Ledingham   | 4200     | NY  | Islamic Republic of Iran: Kermanshah: Harsin | 1965 | a9549361-0e11-4146-9f63-083f8d7c6756 |
| <i>Astragalus tenellus</i>                          | Kirkpatrick | 1610     | NY  | United States of America: Colorado: Pitkin   | 2010 | cc177f99-9208-41ef-9246-8fceb8a99ae9 |
| <i>Astragalus tener</i>                             | Crampton    | 3315     | NY  | United States of America: California: Yolo   | 1956 | d3204468-c2b6-4ab7-b21b-9b7693dec684 |

|                                 |               |                |      |                                                 |      |                                       |
|---------------------------------|---------------|----------------|------|-------------------------------------------------|------|---------------------------------------|
| <i>Astragalus tephrodes</i>     | Crosswhite    | 700            | FLAS | United States of America: Arizona: Yavapai      | 1960 | ea7e801a-e927-492c-bcfe-321f6b7f8b74  |
| <i>Astragalus tephrolobus</i>   | Sumnevicz     | s.n.           | NY   | Russian Federation: Altai                       | 1931 | acd70b61-1b18-4485-a6dd-1fdc76f6d262  |
| <i>Astragalus terminalis</i>    | Lesica        | 2730           | NY   | United States of America: Montana: Beaverhead   | 1983 | d408142f-d0a9-432c-9e1b-5ef18ecdcdb47 |
| <i>Astragalus terrae-rubrae</i> | Butkov        | 6270           | NY   | Uzbekistan: Qashqadaryo                         | 1936 | acd0dd0f-01bc-4756-aeda-13a91ca5d61a  |
| <i>Astragalus testiculatus</i>  | Dubovyk       | s.n.           | NY   | Ukraine: Luhansk: Milove                        | 1958 | cf9b710f-4a62-457f-ae6b-f57e67e97416  |
| <i>Astragalus tetrapterus</i>   | Packard       | 78-64          | NY   | United States of America: Oregon: Malheur       | 1978 | d3b77726-edb8-4a29-96c8-0acb8a079cca  |
| <i>Astragalus thurberi</i>      | Rena          | 2003-406       | CAS  | Mexico: Sonora: Fronteras                       | 2003 | 169bd0f5-7c34-4251-a8fc-602ba8a31a97  |
| <i>Astragalus tibetanus</i>     | Dorn          | 5274           | NY   | United States of America: Wyoming: Fremont      | 1991 | d3b60cda-6624-46b0-9767-df913290c92c  |
| <i>Astragalus tidestromii</i>   | Sanders       | 39143          | NY   | United States of America: California: Inyo      | 2011 | d3a757d3-67c5-4f5b-bd02-9305400f7f2f  |
| <i>Astragalus tiehmii</i>       | Morefield     | 5483 (dupl. c) | NY   | United States of America: Nevada: Washoe        | 1991 | d39f27af-1fe3-44c1-ab76-0cff37a37e18  |
| <i>Astragalus titanophilus</i>  | Reichenbacher | 1687           | NY   | United States of America: Arizona: Coconino     | 1985 | d399154c-db6c-4208-aa38-e05cb3c22225  |
| <i>Astragalus toanus</i>        | Holmgren      | 4949           | NY   | United States of America: Idaho: Owyhee         | 1971 | d407d980-97dd-4cad-b970-4d1fdffd5a74  |
| <i>Astragalus tolucanus</i>     | Rzedowski     | 25902          | CAS  | Mexico: M <sup>v</sup> ©xico                    | 1968 | 1643370d-44d1-404a-ab06-24188c1cbc18  |
| <i>Astragalus tongolensis</i>   | Boufford      | 37356          | NY   | People's Republic of China: Sichuan             | 2006 | aca8ab5a-1d46-4782-8800-2253144fb48f  |
| <i>Astragalus toquimanus</i>    | Tiehm         | 14506          | NY   | United States of America: Nevada: Nye           | 2004 | d3faffe8-0d4e-469f-b694-2fddd692b359  |
| <i>Astragalus tortuosus</i>     | Lamond        | 4474           | NY   | Islamic Republic of Iran: Kordestan             | 1971 | aae5e30f-e13f-4aed-94aa-ae6e8989179d  |
| <i>Astragalus trachycarpus</i>  | Bochantsev    | 1330           | NY   | Tajikistan                                      | 1960 | acba38d2-fc85-44db-a908-3fdb3a0f7910  |
| <i>Astragalus transoxanus</i>   | Kurdjashev    | 6271           | NY   | Uzbekistan                                      | 1929 | acbcd986-6441-43de-9975-51e548438475  |
| <i>Astragalus traskiae</i>      | Junak         | SN-005         | NY   | United States of America: California: Ventura   | 1983 | d3964ecf-d692-4cb1-af40-7d0dc3f89bda  |
| <i>Astragalus tribuloides</i>   | O.H Volk      | 1898           | NY   | Afghanistan: Kabul                              | 1951 | ce4ddc73-22ba-46fe-b4cd-4610879e0c53  |
| <i>Astragalus tricarinatus</i>  | Liston        | 852            | NY   | United States of America: California: Riverside | 1992 | d393ca5d-c3a6-4d54-b34d-89dba26eb207  |
| <i>Astragalus trichanthus</i>   | Goloskokov    | 4821           | NY   | Kazakhstan                                      | 1966 | aca3b531-ae6b-4c80-89a3-18d5acc7f617  |



|                                 |                |          |      |                                                             |      |                                      |
|---------------------------------|----------------|----------|------|-------------------------------------------------------------|------|--------------------------------------|
| <i>Astragalus tricholobus</i>   | Ledingham      | 4182     | NY   | Islamic Republic of Iran: Khorasan-e Jonubi                 | 1965 | ce3d0636-9a3c-497b-9f9b-9368f852985e |
| <i>Astragalus trichopodus</i>   | Reveal         | 6902     | CAS  | Mexico: Baja California: Ensenada                           | 1988 | 169a5b28-8233-4c4c-9412-887a1a447f41 |
| <i>Astragalus triflorus</i>     | Weigend        | 97/741   | NY   | Peru: Arequipa: Caraveli                                    | 1997 | ce38dd57-3171-49d8-930a-933387556260 |
| <i>Astragalus trifoliolatus</i> | Ledingham      | 3471     | NY   | Canada: Saskatchewan                                        | 1962 | ab192507-4fd7-4155-9cff-b62d41f64408 |
| <i>Astragalus trigonus</i>      | Amin           | s.n.     | MO   | Egypt                                                       | 1976 | 163cda8d-cefe-486c-b39d-9752b1cbf8b4 |
| <i>Astragalus trimestris</i>    | Davis          | D. 48556 | NY   | Morocco                                                     | 1969 | d02b3a47-782b-4cfc-8fc5-110eb0c0da37 |
| <i>Astragalus triqueter</i>     | G.F. Ledingham | 4063     | NY   | Islamic Republic of Iran                                    | 1965 | ce368241-66cf-4125-b226-6814fb1b6413 |
| <i>Astragalus troglodytus</i>   | Mielke         | H2173    | NY   | United States of America: Arizona: Coconino                 | 1983 | d387d4c3-c17a-4ec7-b524-d26d5877296d |
| <i>Astragalus tugarinovii</i>   | Kharkevich     | 537      | NY   | Russian Federation: Kamchatskiy                             | 1975 | ac9ef16a-c8e3-4d8a-be14-f172c59f5164 |
| <i>Astragalus turbinatus</i>    | Va[?][?]sosna  | 400      | NY   | Uzbekistan                                                  | 1968 | ac9bd420-52d8-4b9e-9a1d-0a9dccb7357e |
| <i>Astragalus turcomanicus</i>  | Vasak          | s.n.     | NY   | Turkmenistan: Ashabad                                       | 1986 | ac8d6224-05a0-4ea2-842c-fa322fd07170 |
| <i>Astragalus turczaninovii</i> | Putschkov      | 6272     | NY   | Kazakhstan                                                  | 1866 | ac8d3fbc-1123-4600-a80c-a210fecf6049 |
| <i>Astragalus turkmenorum</i>   | Borissova      | 3350     | NY   | Turkmenistan                                                | 1934 | ac850f07-aa13-4e5d-87dc-1b1c45aa0da7 |
| <i>Astragalus turolensis</i>    | Reverchon      | 6. 92.   | NY   | Spain: Teruel                                               | 1892 | cf9e35b7-ba2a-45b3-a03d-f786e5ae33fe |
| <i>Astragalus tweedyi</i>       | Hufford        | 3270     | NY   | United States of America: Washington: Benton                | 1999 | d31b4b94-4eb5-4c6a-b9cb-d8d34d05f5e5 |
| <i>Astragalus tyghensis</i>     | Hitchcock      | 20736    | NY   | United States of America: Oregon: Wasco                     | 1955 | d40a6611-91dc-4adb-a626-8f00fe1a8e1f |
| <i>Astragalus uliginosus</i>    | USDA-ARS       | 420694   | NY   | Russian Federation: Irkutsk                                 | 1981 | ad6b48cc-0b0c-4542-ad3e-a27c8772749d |
| <i>Astragalus umbellatus</i>    | Welsh          | 10057    | NY   | Canada: Yukon Territory                                     | 1970 | d288a3de-9c31-4817-9510-db9793afe879 |
| <i>Astragalus umbraticus</i>    | Liston         | 872      | NY   | United States of America: Oregon                            | 1992 | d281d11b-2627-480c-a0f8-16a05d45120c |
| <i>Astragalus uncialis</i>      | Welsh          | 20619    | NY   | United States of America: Utah: Millard                     | 1981 | d27ea0bd-c1d2-4401-bf57-0e46dc3ca0b8 |
| <i>Astragalus uniflorus</i>     | Feuerer        | 11040b   | NY   | Bolivia (Plurinational State of): Bautista Saavedra: La Paz | 1982 | d1ca603c-53d3-4bb1-9864-aa8bce5b4984 |
| <i>Astragalus unifoliolatus</i> | Belianina      | 161      | HUH  | Turkmenistan                                                | 1975 | fe6b0c77-e847-42e9-a799-8ebf0cd92c61 |
| <i>Astragalus uraniolimneus</i> | v.l komarovi   | 661      | NY   | United States of America                                    | 1956 | ad6a7912-a5f9-4b15-b71a-3c229cba9183 |
| <i>Astragalus utahensis</i>     | Foster         | 10410    | FLAS | United States of America: Wyoming: Uinta                    | 1991 | ea6c3742-0857-4fcc-bc46-fbe481766062 |
| <i>Astragalus vaccarum</i>      | Yen            | 2669     | CAS  | Mexico: Chihuahua                                           | 1994 | 16867fcf-9cfe-426d-81d1-4f11f7250653 |

|                                                      |                 |        |      |                                               |      |                                      |
|------------------------------------------------------|-----------------|--------|------|-----------------------------------------------|------|--------------------------------------|
| <i>Astragalus valerianensis</i>                      | Zollner         | 5701   | NY   | Chile: Curico                                 | 1971 | d23b0b99-3074-41fe-98bc-2afc2d195bf3 |
| <i>Astragalus vallis</i>                             | Atwood          | 12067  | NY   | United States of America: Idaho: Washington   | 1986 | d2c67619-16aa-4e4f-b3ea-f23f7f9e94b4 |
| <i>Astragalus varius</i>                             | Dubovyk         | s.n.   | NY   | Ukraine: Luhansk: Milove                      | 1958 | cfbe44d2-c49e-4447-877f-575e15afc80e |
| <i>Astragalus varzobicus</i>                         | Vvedensky       | 6242   | HUH  | Uzbekistan                                    | 1929 | fe2b9650-a9e3-4cef-b06f-ed2e8a80ae2b |
| <i>Astragalus vegetus</i>                            | Barneby         | 384777 | NY   | Islamic Republic of Iran                      | 1979 | ce34f589-e8f1-4a9a-89a8-0192e310a438 |
| <i>Astragalus versicolor</i>                         | Popov           | 3827   | HUH  | Russian Federation: Irkutsk                   | 1952 | fe24af05-3573-4e50-9c50-fa861709abe3 |
| <i>Astragalus verticillatus</i>                      | Ricardi         | 3182   | NA   | Chile: Colchagua: San Fernando                | 1955 | e741730b-806a-48cc-b05e-cc5b5691a10a |
| <i>Astragalus verus (Astracantha meana)</i>          | [Cyrillic]      | s.n.   | MO   | [Cyrillic]                                    | 1957 | 0c287c56-356e-4028-9822-0ae0c74b571a |
| <i>Astragalus verus (Astracantha multifoliolata)</i> | [Cyrillic]      | s.n.   | MO   | Turkmenistan                                  | 1954 | 0c315497-bddc-4caf-b655-cbabcb5301d9 |
| <i>Astragalus verus (Astracantha pileoclada)</i>     | [Cyrillic]      | s.n.   | MO   | Turkmenistan                                  | 1953 | 0c54bbac-3871-4eb9-bd54-72955cab949f |
| <i>Astragalus verus (Astracantha meschedensis)</i>   | Kurbanov        | 1474   | MO   | Turkmenistan                                  | 2001 | 0c2c24f9-1785-4619-a8c7-70c8db77f153 |
| <i>Astragalus verus (Astracantha strobilifera)</i>   | Stewart         | 22962a | NY   | Pakistan: Kashmir                             | 1946 | aa79ccfe-496a-46ae-bfd8-f9da3935d730 |
| <i>Astragalus verus (Astracantha pulvinata)</i>      | Vvedensky       | 6267   | HUH  | Turkmenistan                                  | 1927 | 009c6e6a-ac26-4552-bda5-298d0ac7b463 |
| <i>Astragalus vesicarius</i>                         | Charpin         | 8325   | NY   | France: Hautes-Alpes: Laragne                 | 1969 | cfaf483a-69fb-4d67-a2c4-d8281e96d060 |
| <i>Astragalus vesiculosus</i>                        | Ellenberg       | 4625   | NY   | Chile                                         | 1971 | d23aea77-7b17-43f9-881a-b4a70922bd83 |
| <i>Astragalus vexans</i>                             | Podlech         | 29748  | NY   | Afghanistan: Herat: Sudhang des Sabzak-Passes | 1977 | ce298ce4-eb32-4022-b0bd-a32b5ab217b5 |
| <i>Astragalus vicarius</i>                           | Goloskokov      | 4469   | NY   | Kazakhstan: Zhambyl                           | 1963 | ad6641da-3f4a-4929-af78-881bcf8665ac |
| <i>Astragalus villosus</i>                           | Herring         | 1108   | FLAS | United States of America: Florida: Columbia   | 1993 | e9daa50b-2770-467b-b971-075413e87fc1 |
| <i>Astragalus viridiflorus</i>                       | Popov           | 6244   | HUH  | Kazakhstan                                    | 1930 | fe130d4e-709d-429d-91bc-cd8f6aca1851 |
| <i>Astragalus vulpinus</i>                           | Androssov       | 7424   | NY   | Kazakhstan: Aktjubinsk                        | 1908 | cfbe144e-0be4-4b18-8f68-6706b4f530fb |
| <i>Astragalus wardii</i>                             | M. Ben Franklin | 7191   | FLAS | United States of America: Utah: Garfield      | 1990 | ea8cf49b-3491-4f91-888f-dad412a383f4 |
| <i>Astragalus waterfallii</i>                        | Spellenberg     | 4638   | NY   | United States of America: New Mexico: Otero   | 1977 | d27a648d-9876-4e78-b94c-ab141299a452 |
| <i>Astragalus webberi</i>                            | Hanson          | s.n.   | NY   | United States of America: California: Plumas  | 1987 | d2bdf26b-9aed-49ed-9539-e4cb5e4cc26e |

|                                                                    |             |          |      |                                                      |      |                                      |
|--------------------------------------------------------------------|-------------|----------|------|------------------------------------------------------|------|--------------------------------------|
| <i>Astragalus webbianus</i>                                        | Singh       | 4232     | NY   | India: Kashmir                                       | 1972 | ce1cc552-74c5-4757-b33a-7d6b814d11a7 |
| <i>Astragalus weberbaueri</i>                                      | Sagdstegui  | 16084    | NY   | Peru: Santiago de Chuco                              | 1997 | d22a7d82-0ed0-4ada-838b-f142fbf80e89 |
| <i>Astragalus weddellianus</i>                                     | Weigend. M. | 2000/478 | NY   | Peru: Puno: Juli                                     | 2000 | d226ddb7-28fa-4125-9ab1-0269199d9d9c |
| <i>Astragalus welshii</i>                                          | Welsh       | 6477     | NY   | United States of America: Utah: Wayne                | 1967 | d272c4d9-ce87-4fc8-8baa-3b583017f7a8 |
| <i>Astragalus wetherillii</i>                                      | Welsh       | 6235     | NY   | United States of America: Colorado: Garfield         | 1967 | d2bd4007-0215-4885-ba4e-655d99ff86f3 |
| <i>Astragalus williamsii</i>                                       | Kowalczyk   | 9        | NY   | Canada: Yukon Territory                              | 1971 | d2bc095e-13c4-4683-a6a4-6582c26d385a |
| <i>Astragalus wingatanus</i>                                       | d Atwood    | 22045    | NY   | United States of America: Utah                       | 1997 | d26cc0a0-b87d-4ec6-a58e-70b3da543d70 |
| <i>Astragalus wittmannii</i>                                       | Spellenberg | 5991     | NY   | United States of America: New Mexico: Harding        | 1981 | d2b31d7f-4315-4afe-a50e-7006fda3ed9f |
| <i>Astragalus woodruffii</i>                                       | Atwood      | 8681     | NY   | United States of America: Utah: Wayne                | 1982 | d2692522-babc-4815-bd08-cf663ce8028c |
| <i>Astragalus wootonii</i>                                         | Ventura     | 632      | CAS  | Mexico: Hidalgo: Tepeapulco                          | 1975 | 167fb7e0-4791-40b3-b1cf-fc749e1700e3 |
| <i>Astragalus wrightii</i>                                         | Tharp       | 44041    | NY   | United States of America: Texas: Travis              | 1944 | d2b0a388-ad58-458f-b573-2517d27d6d6e |
| <i>Astragalus xanthomeloides</i>                                   | Vvedensky   | 6245     | HUH  | Unknown Country                                      | 1930 | fde0bf9e-b017-4f03-8a0f-b4203cd52fad |
| <i>Astragalus xiphidioides</i>                                     | Hevron      | 698b     | NY   | United States of America: Arizona: Navajo            | 1990 | d2a90952-64ca-4d81-a826-2515bdc43ebc |
| <i>Astragalus xiphidium</i>                                        | Lachashvili | 499      | NY   | Georgia: East Georgia: Dedoplistkali District        | 2006 | cf208803-d32d-4e55-b8e6-2977672e074f |
| <i>Astragalus yoder-williamsii</i>                                 | Rosentreter | 3489     | NY   | United States of America: Nevada: Humboldt           | 1984 | d2a06b8f-5fa0-4796-9220-8aa2104cb8f7 |
| <i>Astragalus yunnanensis</i><br>( <i>Astragalus fenzelianus</i> ) | Boufford    | 31818    | HUH  | People's Republic of China: Xizang (Tibet)           | 2004 | fa38fcff-372c-448e-9f76-4b79ecd2e65c |
| <i>Astragalus zacharensis</i>                                      | Cao         | 53       | FLAS | People's Republic of China: Heilongjiang: Daqingshan | 1991 | ea772c5c-0aef-499b-bb23-1e45b02d0957 |
| <i>Astragalus zagrosicus</i>                                       | Ledingham   | 4103     | NY   | Islamic Republic of Iran: Fars                       | 1965 | ce0e36f5-c79c-414f-be06-5bf20e2fb993 |
| <i>Astragalus zanskarensis</i>                                     | Webster     | 5784     | HUH  | Pakistan: Baltistan: Skardu                          | 1955 | fd62c73b-aa74-438e-83bc-e3eb0b5371b5 |
| <i>Astragalus zingeri</i>                                          | Skvortsov   | s.n.     | NY   | Russian Federation: Saratov: Hvalynsk                | 1993 | cf1c4ddb-9cc5-459a-8336-5dee469e1b1a |
| <i>Astragalus zionis</i>                                           | Neese       | 16890    | NY   | United States of America: Utah: Washington           | 1985 | d25cab54-46aa-432e-89ea-31af68d6cd92 |
| <i>Biserrula epiglottis</i>                                        | Wilczek     | 178      | MO   | Morocco                                              | 1928 | 1579f02c-9844-41d7-abc9-307a179d6358 |

|                               |            |           |      |                                                |      |                                      |
|-------------------------------|------------|-----------|------|------------------------------------------------|------|--------------------------------------|
| <i>Carmichaelia violacea</i>  | Chapman    | 258520    | MO   | New Zealand                                    | 1970 | 17abaf6f-55c2-4cb5-a7aa-28ea2ed1f278 |
| <i>Clianthus puniceus</i>     | Breteler   | 13684     | MO   | New Zealand: North Island                      | 1996 | 172f84d3-6023-48a6-8fbd-1426cbe05a34 |
| <i>Colutea abyssinica</i>     | Simon      | 857       | MO   | Tanzania: Arusha: Monduli                      | 2001 | 16e6a46a-09bc-4471-8a31-d8ac5a80dd74 |
| <i>Eremosparton flaccidum</i> | Belyanina  | 26        | MO   | Turkmenistan: Kara-Kumy: Repetek               | 1979 | 6ce6a816-4321-4e3f-8c67-e64506df10ac |
| <i>Erophaca baetica</i>       | Lewalle    | 12219     | MO   | Morocco                                        | 1989 | 1511ff5a-b9e2-4899-aa11-64ef7fec40c4 |
| <i>Hedysarum boreale</i>      | Kass       | 3262      | FLAS | United States of America: Wyoming: Sweetwater  | 1991 | f0b6e23e-7346-42df-a499-aa05d5d52a6b |
| <i>Lessertia capitata</i>     | Goldblatt  | 3673      | MO   | South Africa: Cape                             | 1976 | 5048e728-0a1c-48b2-9b7a-9e872442c8b6 |
| <i>Onobrychis conferta</i>    | Dubuis     | 13246     | MO   | Algeria: M'Sila: Bou-Saada                     | 1986 | 6b5615a8-6aa7-42b6-8be0-225c14135843 |
| <i>Oxytropis aciphylla</i>    | Shiquan    | 20[5?]4   | MO   | [Chinese]                                      | 1980 | 04e037e9-79f2-4c3b-aa3d-a66bad0da0a2 |
| <i>Oxytropis adamsiana</i>    | Petrovsky  | 6576      | MO   | Russian Federation: Sakha: Bulunsky            | 1984 | 04f9c33c-cfb6-4535-bd55-711579fe7562 |
| <i>Oxytropis albana</i>       | Atha       | 2698      | MO   | Georgia: Mtskheta-Mtianeti: Kazbegi            | 2002 | 05223403-4639-4282-b021-9102a14d4568 |
| <i>Oxytropis arctica</i>      | Gillespie  | 8954-2    | MO   | Canada: Northwest Territories                  | 2009 | 0cfa9a7b-6f17-469e-a789-65d95b6312ec |
| <i>Oxytropis aspera</i>       | Vvedensky  | 6274      | MO   | Uzbekistan                                     | 1929 | 0539eb06-7bcf-4d0b-8aad-f7c63af4882b |
| <i>Oxytropis aucheri</i>      | Rechinger  | 35436     | MO   | Afghanistan: Paktia                            | 1967 | 05166e43-8196-4b6e-b63a-9b947ad18a59 |
| <i>Oxytropis besseyi</i>      | Foster     | 10424     | FLAS | United States of America: Wyoming: Sweetwater  | 1991 | ec7e5497-5fd0-474b-907c-e0910a64d888 |
| <i>Oxytropis bicolor</i>      | Wang       | 91244     | MO   | People's Republic of China: Gansu              | 1991 | 04f08eb9-86a4-43f0-9e41-acb43d8802c9 |
| <i>Oxytropis campanulata</i>  | Elias      | 7094      | MO   | Russian Federation: Altay: Ust-Kansky          | 1983 | 04f16b2c-8c6d-4aa3-9a25-ffab9d5bbab2 |
| <i>Oxytropis campestris</i>   | Welsh      | 24742     | FLAS | United States of America: South Dakota: Custer | 1991 | ec7bf570-b8a8-49c7-a6b8-221923f9dccc |
| <i>Oxytropis chionobia</i>    | Sodombekov | KPL_00628 | MO   | Kyrgyzstan: Naryn: Kochkor                     | 2006 | 05085790-3aed-4d74-a6c6-dabee0d99fe3 |
| <i>Oxytropis ciliata</i>      | Cao        | 130       | FLAS | People's Republic of China: Hohhot: Daqingshan | 1991 | ec623678-7df4-4f99-bbd8-3485e280989a |
| <i>Oxytropis coerulea</i>     | Wang       | 368       | MO   | People's Republic of China                     | 1998 | 051c37de-48c5-4142-a307-0ba2b0c42b29 |
| <i>Oxytropis czukotica</i>    | Kharkevich | 550a      | MO   | Russian Federation: Kamchatka: Olyutorsky      | 1974 | 0536240f-cae5-4dac-b8e1-b3479df1b86e |
| <i>Oxytropis deflexa</i>      | Harriman   | 18215     | FLAS | United States of America: Colorado: Park       | 1984 | ec72c93d-6656-4081-9ad2-9aa7b6eed9f5 |

|                               |                                   |           |      |                                                                          |           |                                      |
|-------------------------------|-----------------------------------|-----------|------|--------------------------------------------------------------------------|-----------|--------------------------------------|
| <i>Oxytropis eriocarpa</i>    | Khanmichun                        | 19        | MO   | Russian Federation: Siberia: Tuva                                        | 1973      | 054c6d23-aae8-412f-a80b-453df977ed4f |
| <i>Oxytropis exserta</i>      | Kharkevich                        | 552c      | MO   | Russian Federation: Kamchatka: Olyutorsky                                | 1975      | 054fbe06-1ce0-4843-b0c9-cbc45e45ed14 |
| <i>Oxytropis falcata</i>      | Ho                                | 1534      | MO   | People's Republic of China: Qinghai: Hainan Zangzu                       | 1993      | 05200ba5-732a-4c5a-a1e6-5087e6ac107a |
| <i>Oxytropis grandiflora</i>  | Budantzev                         | 759       | MO   | Mongolia: Dornod: Khalkhgol                                              | 1987      | 052e9530-04f2-43dd-9584-bf4f82d60f89 |
| <i>Oxytropis hirta</i>        | Li                                | 2548      | MO   | [Chinese]                                                                | Not Shown | 054b72af-3449-4b19-bd0a-852bd68ef3e1 |
| <i>Oxytropis humifusa</i>     | Chukarina                         | 4592      | MO   | Tajikistan: Pamir                                                        | 1971      | 0c029dfb-5c36-4a15-88a7-db95d004bfde |
| <i>Oxytropis immersa</i>      | AchmetsPeople's Republic of China | s.n.      | MO   | Tajikistan                                                               | 1968      | 054b6cd4-6dd5-45a8-bb86-374946740672 |
| <i>Oxytropis jacquinii</i>    | Bussman                           | 43239     | MO   | Slovenia: Goriš <sup>o</sup> ka                                          | 1988      | 04dc0e5f-a417-485c-a2e6-39e798ce42c2 |
| <i>Oxytropis jonesii</i>      | Franklin                          | 7198      | BRIT | United States of America: Utah: Garfield                                 | 1990      | 6c5bac9c-b0a6-4372-8eae-9174920812c5 |
| <i>Oxytropis jordalii</i>     | Barker                            | BG07-058B | MO   | United States of America: Alaska: Valdez Cordova                         | 2007      | 0cfa8401-a53e-4807-b100-c2d328f2d260 |
| <i>Oxytropis kansuensis</i>   | Ho                                | 165       | MO   | People's Republic of China: Qinghai: Hainan Zangzu                       | 1993      | 0558ad39-fa5e-471a-9fd4-34eda1cad5c4 |
| <i>Oxytropis kobukensis</i>   | Lipkin                            | 84-68     | MO   | United States of America: Alaska                                         | 1984      | 0ce21f3d-dba9-4a54-943c-d7bd6969b4dd |
| <i>Oxytropis koyukukensis</i> | Murray                            | 3692      | MO   | United States of America: Alaska                                         | 1973      | 0ce1a27f-f8ed-4e21-bfad-9057629c43fa |
| <i>Oxytropis lagopus</i>      | Henderson                         | 90-65     | MO   | United States of America: Texas: Donley                                  | 1990      | 0cdeadb3-df15-4abf-a135-980ee2e7ae28 |
| <i>Oxytropis lambertii</i>    | Welsh                             | 24764     | FLAS | United States of America: Wyoming: Weston                                | 1991      | ec6b7cfa-5fc7-4556-986a-beb4c68e073e |
| <i>Oxytropis lapponica</i>    | Oxborne                           | 516       | MO   | Kyrgyzstan: Talas: Talas                                                 | 2008      | 0558d0b6-43c4-4b8e-aaf5-b0dda32da2fe |
| <i>Oxytropis macrocarpa</i>   | Sodombekov                        | KPL_00379 | MO   | Kyrgyzstan: Chui: Ysyk-Ata                                               | 2005      | 055d0761-1305-4f61-abe5-4a771e96b6bc |
| <i>Oxytropis maydelliana</i>  | Parker                            | 8885      | MO   | United States of America: Alaska: Bethel                                 | 1999      | 0cdf5509-b999-451d-9837-2a18fe044ce4 |
| <i>Oxytropis melanocalyx</i>  | Ho                                | 421       | MO   | People's Republic of China: Qinghai: Golog Autonomous Tibetan Prefecture | 1993      | 056166d5-71c1-4d52-97d3-98c33a20bf4e |
| <i>Oxytropis mertensiana</i>  | Murray                            | 3172      | MO   | United States of America: Alaska                                         | 1970      | 0cdb0bb8-da1f-4b2f-b43c-a558ce6a920b |
| <i>Oxytropis michelsonii</i>  | Abdusaljamora                     | 5212      | MO   | Tajikistan                                                               | 1967      | 056b7240-b44b-4ba9-9ad1-77d036bceee6 |
| <i>Oxytropis microphylla</i>  | Iokawa                            | 40011     | MO   | Nepal: Gandaki Pradesh: Mustang                                          | 2003      | 056c0db5-9f71-4374-86b8-f3286463b4f0 |

|                               |            |           |      |                                                         |      |                                      |
|-------------------------------|------------|-----------|------|---------------------------------------------------------|------|--------------------------------------|
| <i>Oxytropis mollis</i>       | Iokawa     | 40004     | MO   | Nepal: Gandaki Pradesh: Mustang                         | 2003 | 05829b3a-6084-4d45-b522-c63677f78684 |
| <i>Oxytropis multiceps</i>    | King       | 11696     | MO   | United States of America: Wyoming: Albany               | 2001 | 0cd03c8c-483e-4d49-86b4-e18f057447c6 |
| <i>Oxytropis nana</i>         | Meyer      | 1172      | MO   | United States of America: Wyoming: Albany               | 2011 | 0cd298a0-65fe-46f5-85e5-d84698c32886 |
| <i>Oxytropis neglecta</i>     | Charpin    | 19752     | MO   | Italy: Cuneo                                            | 1985 | 04e46b41-cd0e-4760-b088-3bb9ec799dcb |
| <i>Oxytropis nigrescens</i>   | Lipkin     | 82        | MO   | United States of America: Alaska: Bethel                | 1993 | 0cf0184b-7b2c-4e80-9820-1ccba3ffb174 |
| <i>Oxytropis nutans</i>       | Sodombekov | KPL_00412 | MO   | Kyrgyzstan: Chui                                        | 2005 | 05610514-f170-43a4-af0e-26bf48d4cd83 |
| <i>Oxytropis obnapiformis</i> | Weber      | 12656     | TEX  | United States of America: Colorado: Moffat              | 1965 | 10da7bb1-890c-41ee-b9f8-22cce4331915 |
| <i>Oxytropis ochotensis</i>   | [Cyrillic] | s.n.      | MO   | Russian Federation: Magadan: Khasynskiy                 | 1969 | 0569f460-f5b2-4912-8996-f9cece956a9e |
| <i>Oxytropis ochrantha</i>    | Cao        | 66        | FLAS | People's Republic of China: Inner Mongolia: Hohhot      | 1991 | ec4cf8bb-e12c-4096-bc4c-d20095534237 |
| <i>Oxytropis ochrocephala</i> | Boufford   | 40287     | MO   | People's Republic of China: Sichuan: Aba Zangzu Qiangzu | 2007 | 056db88c-af48-4a6f-9a20-1e4407dfdeac |
| <i>Oxytropis ochroleuca</i>   | Smith      | 11377     | MO   | People's Republic of China: Sikang: Kangting            | 1934 | 05896fe4-4142-440d-b620-66cdb6f0fa24 |
| <i>Oxytropis oreophila</i>    | Welsh      | 26992     | MO   | United States of America: Utah: Garfield                | 1998 | 0ccb45a1-2f4c-414b-aa48-ff6e351fb8d6 |
| <i>Oxytropis oxyphyloides</i> | Malyshev   | 4031      | MO   | Russian Federation: Irkutsk                             | 1955 | 058b0554-b121-4870-a5b6-9ef5cb4943bc |
| <i>Oxytropis parryi</i>       | Huber      | 3813      | MO   | United States of America: Utah: Wasatch                 | 1998 | 0cc63caa-d350-43f7-9546-427cc835b4b1 |
| <i>Oxytropis pauciflora</i>   | Ho         | 768       | MO   | People's Republic of China: Qinghai: Golog Tibetan      | 1993 | 05943296-8355-4be9-a80e-bb0bdd489a5e |
| <i>Oxytropis pilosa</i>       | Kleineberg | 6112      | MO   | Germany                                                 | 1973 | 04c7443c-a46d-4dc5-ac86-93f4b134976a |
| <i>Oxytropis podoloba</i>     | Goloskokov | 4421      | MO   | Kazakhstan                                              | 1959 | 059f86d6-c3fb-4833-ae53-02e23d250220 |
| <i>Oxytropis poncinsii</i>    | Medvedev   | 49        | MO   | Tajikistan: Pamir                                       | 1985 | 05a977b1-100b-4503-898a-89fc411a2a34 |
| <i>Oxytropis qinghaiensis</i> | Ho         | 589       | MO   | People's Republic of China: Qinghai: Golog Tibetan      | 1993 | 052ae417-7fdd-431c-a0af-9ea618573822 |
| <i>Oxytropis racemosa</i>     | [Chinese]  | 1139      | MO   | [Chinese]                                               | 1983 | 05bbb0e5-a1e9-4974-ba4e-52fb59f1d49c |
| <i>Oxytropis recognita</i>    | Zomonosova | s.n.      | MO   | Russian Federation: Altay: Kosh-Agachskiy               | 1982 | 05b29410-45d2-480d-9727-6fe332657c58 |
| <i>Oxytropis riparia</i>      | Rechinger  | 18122     | MO   | Afghanistan: Bamian                                     | 1962 | 05ca7139-12a7-40fc-a2fe-7605a4e6ee26 |

|                                                                 |               |            |      |                                                               |      |                                      |
|-----------------------------------------------------------------|---------------|------------|------|---------------------------------------------------------------|------|--------------------------------------|
| <i>Oxytropis roseiformis</i>                                    | Botschantzev  | s.n.       | MO   | Tajikistan                                                    | 1960 | 05cc36db-c66c-4b46-b7a1-b661a402f629 |
| <i>Oxytropis savellanica</i>                                    | Akhmetshina   | s.n.       | MO   | Tajikistan                                                    | 1968 | 058a88f8-b8e2-4674-b9ef-cb8687849342 |
| <i>Oxytropis scammaniana</i>                                    | Parker        | 8768       | MO   | United States of America: Alaska: Bethel                      | 1999 | 0cbe9132-c327-4533-b681-902d6295a7cf |
| <i>Oxytropis sericea</i>                                        | Foster        | 10416      | FLAS | United States of America: Wyoming: Uinta                      | 1991 | ec6918a2-3596-4ad3-933b-7529e4921f43 |
| <i>Oxytropis splendens</i>                                      | van der Werff | 26017      | MO   | United States of America: New Mexico: Taos                    | 2015 | 0cba2d72-282e-420d-a1ca-1a6bbb1a2cd  |
| <i>Oxytropis squammulosa</i>                                    | Kamelin       | 155        | MO   | Mongolia: Dornod: Matad                                       | 1987 | 056a94fc-ce24-41c0-aa30-f8e379a919f9 |
| <i>Oxytropis strobilacea</i>                                    | [Cyrillic]    | s.n.       | MO   | Russian Federation: Tyva Republic: Mongun-Tayginsky           | 1980 | 0597ccfa-f23a-40a3-a8b0-959ec354319a |
| <i>Oxytropis talassica</i>                                      | Sodombekov    | KPL_00603  | MO   | Kyrgyzstan: Naryn: Kochkor                                    | 2006 | 05a47f68-ed30-47df-9d58-8a9eb015c16d |
| <i>Oxytropis taochensis</i>                                     | Wang          | 901101     | MO   | People's Republic of China: Gansu: Linxia Hui                 | 1991 | 05ab4d36-3482-4596-9788-8767772d8f7a |
| <i>Oxytropis tianschanica</i>                                   | Stanjukovicz  | 7844       | MO   | Tajikistan: Gorno-Badakhshan                                  | 1952 | 05b54e51-e2c6-4493-b485-3c57de93e589 |
| <i>Oxytropis vassilievii</i>                                    | Kaharkevich   | 1118       | MO   | Russian Federation: Kamchatka: Ayano-Maysky                   | 1977 | 05c8944c-17e5-4f8e-be6b-642dc840faea |
| <i>Oxytropis viscida</i>                                        | Scott         | 8130 SAL   | FLAS | United States of America: Wyoming: Fremont                    | 1991 | ec660bed-8cc7-405e-9b96-5aa4aa326060 |
| <i>Oxytropis williamsii</i>                                     | Ross          | TUCH-MO 66 | MO   | Nepal: Gandaki Pradesh: Manang                                | 2009 | 05cb8d42-5817-4b80-bdf1-4bd173c735b4 |
| <i>Oxytropis yunnanensis</i>                                    | Ho            | 1640       | MO   | People's Republic of China: Qinghai: Yushu                    | 1996 | 05db621b-0925-4efb-ad22-dd71787d9206 |
| <i>Phyllobium balfourianum</i><br>( <i>Astragalus prattii</i> ) | Boufford      | 28339      | HUH  | People's Republic of China: Sichuan Province: Xiangcheng Xian | 1998 | 0102421d-c383-40d2-8f49-26961abc066a |
| <i>Phyllobium balfourianum</i>                                  | Rock          | 5327       | NY   | People's Republic of China: Yunnan                            | 1922 | ced84ef6-9072-4d71-855c-906d9da645f3 |
| <i>Phyllobium donianum</i>                                      | Ludlow        | 19492      | HUH  | Bhutan: Bumthang                                              | 1949 | fc851e2f-7835-430e-8afb-782f9d879a1b |
| <i>Phyllobium tribulifolium</i>                                 | Boufford      | 26850      | NY   | People's Republic of China                                    | 1995 | ad73aef4-06b6-4df1-a240-3dd854d0dd8e |
| <i>Phyllobium tribulifolium</i>                                 | Stewart       | 22,839     | NY   | India: Punjab                                                 | 1946 | ce1449be-a037-4155-981d-563220506d48 |
| <i>Podlechiella vogelii</i>                                     | Mokhtar       | 5          | MO   | Egypt                                                         | 1980 | 163a83ab-3015-4aa5-af58-ce9d55b56959 |
| <i>Podolotus hosackioides</i>                                   | Rashid        | 25853      | NY   | Pakistan: Azad Kashmir                                        | 1954 | a9f94d10-8570-4ee9-abb0-99d8a86ca999 |
| <i>Smirnowia turkestanica</i>                                   | Belianina     | 160        | MO   | Turkmenistan                                                  | 1975 | e143d7fc-df8a-44d7-ac16-8c642460dafa |
| <i>Sphaerophysa salsula</i>                                     | Hatle         | 167        | FLAS | United States of America: Wyoming: Fremont                    | 1990 | 1967e7c1-a057-45ef-903c-f9a3f7541399 |

|                                 |         |       |     |                                  |      |                                      |
|---------------------------------|---------|-------|-----|----------------------------------|------|--------------------------------------|
| <i>Sutherlandia microphylla</i> | van Wyk | 2660  | TEX | South Africa: Cape               | 1986 | 0a73748a-3142-4baf-8877-b624a1f03324 |
| <i>Swainsona formosa</i>        | Herman  | 658   | MO  | South Africa: Transvaal          | 1982 | 175c43b9-bf41-4a2f-89a2-6943e974414f |
| <i>Wisteria sinensis</i>        | Degener | 35249 |     | United States of America: Hawaii | 1981 | 2f27b596-4028-4b40-b9f3-d222890dd14e |

**Table S1.** Accession table.



**Table S2.** Results for phylogenetic signal tests.

| <b>Variable</b> | <b><math>\lambda</math></b> | <b><i>p</i>-value</b> | <b><i>p</i>-value (Hochberg-corrected)</b> |
|-----------------|-----------------------------|-----------------------|--------------------------------------------|
| BIO1            | 0.860019                    | 1.14E-48              | 1.03E-47                                   |
| BIO2            | 0.6706                      | 4.28E-122             | 4.28E-121                                  |
| BIO3            | 0.8874                      | 1.86E-134             | 2.05E-133                                  |
| BIO4            | 0.755717                    | 2.79E-42              | 2.23E-41                                   |
| BIO7            | 0.687896                    | 5.76E-30              | 2.88E-29                                   |
| BIO12           | 0.585947                    | 2.01E-13              | 2.01E-13                                   |
| BIO15           | 0.71018                     | 1.67E-26              | 5.01E-26                                   |
| elevation       | 0.856952                    | 1.46E-35              | 1.02E-34                                   |
| nitrogen        | 0.545634                    | 1.94E-29              | 7.76E-29                                   |
| pH              | 0.312943                    | 3.59E-24              | 7.18E-24                                   |
| aridity         | 0.637648                    | 8.45E-31              | 5.07E-30                                   |

**Table S3.** Detailed results for two-way MANOVA, with variance partitioned by taxonomic group, biogeographic region, and their interaction. Boldface *p*-values were considered significant.

| <b>Predictor</b>                | <b>Sum of Squares<br/>(normalized)</b> | <b>Mean Squares<br/>(normalized)</b> | <b><i>p</i>-value for<br/><i>F</i>-test</b> |
|---------------------------------|----------------------------------------|--------------------------------------|---------------------------------------------|
| bio1: taxonomic group           | 47.34                                  | 6.7627                               | <b>6.48E-12</b>                             |
| bio1: biogeographic region      | 178.33                                 | 9.9072                               | <b>&lt;2E-16</b>                            |
| bio1: group*biogeography        | 49.62                                  | 1.0786                               | <b>0.008478</b>                             |
| bio2: taxonomic group           | 303.892                                | 43.413                               | <b>&lt;2E-16</b>                            |
| bio2: biogeographic region      | 104.09                                 | 5.783                                | <b>&lt;2E-16</b>                            |
| bio2: group*biogeography        | 19.495                                 | 0.424                                | 0.5081                                      |
| bio3: taxonomic group           | 303.892                                | 43.413                               | <b>&lt;2E-16</b>                            |
| bio3: biogeographic region      | 104.09                                 | 5.783                                | <b>&lt;2E-16</b>                            |
| bio3: group*biogeography        | 19.495                                 | 0.424                                | 0.5081                                      |
| bio4: taxonomic group           | 36.85                                  | 5.2648                               | <b>5.83E-11</b>                             |
| bio4: biogeographic region      | 270.08                                 | 15.0042                              | <b>&lt;2E-16</b>                            |
| bio4: group*biogeography        | 35.43                                  | 0.7701                               | 0.06181                                     |
| bio7: taxonomic group           | 17.04                                  | 2.4339                               | <b>0.000371</b>                             |
| bio7: biogeographic region      | 56.23                                  | 14.2353                              | <b>&lt;2E-16</b>                            |
| bio7: group*biogeography        | 32.13                                  | 0.6984                               | 0.282644                                    |
| bio12: taxonomic group          | 28.34                                  | 4.0486                               | <b>1.53E-05</b>                             |
| bio12: biogeographic region     | 94.49                                  | 5.2495                               | <b>5.76E-15</b>                             |
| bio12: group*biogeography       | 68.63                                  | 1.492                                | <b>0.0007799</b>                            |
| bio15: taxonomic group          | 67.56                                  | 9.6516                               | <b>6.86E-15</b>                             |
| bio15: biogeographic region     | 105.68                                 | 5.8709                               | <b>&lt;2E-16</b>                            |
| bio15: group*biogeography       | 35.91                                  | 0.7806                               | 0.473                                       |
| bio17: taxonomic group          | 30.37                                  | 4.3383                               | <b>6.48E-07</b>                             |
| bio17: biogeographic region     | 139.01                                 | 7.7227                               | <b>&lt;2E-16</b>                            |
| bio17: group*biogeography       | 83.03                                  | 1.8051                               | <b>2.85E-07</b>                             |
| elevation: taxonomic group      | 104.28                                 | 14.8975                              | <b>&lt;2E-16</b>                            |
| elevation: biogeographic region | 142.32                                 | 7.9067                               | <b>&lt;2E-16</b>                            |
| elevation: group*biogeography   | 40                                     | 0.8697                               | 0.078                                       |
| nitrogen: taxonomic group       | 54.27                                  | 7.7529                               | <b>&lt;2E-16</b>                            |
| nitrogen: biogeographic region  | 229.23                                 | 12.7352                              | <b>&lt;2E-16</b>                            |
| nitrogen: group*biogeography    | 67.37                                  | 1.4645                               | <b>7.74E-08</b>                             |
| carbon: taxonomic group         | 52.793                                 | 7.5418                               | <b>&lt;2E-16</b>                            |
| carbon: biogeographic region    | 272.794                                | 15.1552                              | <b>&lt;2E-16</b>                            |
| carbon: group*biogeography      | 72.415                                 | 1.5742                               | <b>1.86E-11</b>                             |

|                                          |        |         |                  |
|------------------------------------------|--------|---------|------------------|
| ph: taxonomic group                      | 95.15  | 13.5933 | <2E-16           |
| ph: biogeographic region                 | 129.81 | 7.2118  | <2E-16           |
| ph: group*biogeography                   | 28.76  | 0.6253  | 0.6932           |
| sand: taxonomic group                    | 176.99 | 25.2847 | <2E-16           |
| sand: biogeographic region               | 61.67  | 3.4259  | <b>1.26E-10</b>  |
| sand: group*biogeography                 | 27.35  | 0.5945  | 0.7274           |
| coarsefragment: taxonomic group          | 84.76  | 12.1086 | <2E-16           |
| coarsefragment: biogeographic region     | 104.06 | 5.7809  | <2E-16           |
| coarsefragment: group*biogeography       | 27.98  | 0.6083  | 0.8357           |
| needleleaf: taxonomic group              | 97.42  | 13.9174 | <2E-16           |
| needleleaf: biogeographic region         | 72.56  | 4.0312  | <b>1.98E-10</b>  |
| needleleaf: group*biogeography           | 12.51  | 0.2721  | 1                |
| deciduousbroadleaf: taxonomic group      | 49.93  | 7.1323  | <b>1.61E-09</b>  |
| deciduousbroadleaf: biogeographic region | 44.13  | 2.4518  | <b>0.0001021</b> |
| deciduousbroadleaf: group*biogeography   | 55.35  | 1.2033  | <b>5.43E-02</b>  |
| herbaceous: taxonomic group              | 25.7   | 3.6717  | <b>0.0002146</b> |
| herbaceous: biogeographic region         | 80.49  | 4.4715  | <b>1.27E-10</b>  |
| herbaceous: group*biogeography           | 27.94  | 0.6074  | 0.9508394        |
| aridity: taxonomic group                 | 44.66  | 6.38    | <b>7.39E-13</b>  |
| aridity: biogeographic region            | 198.75 | 11.0417 | <2E-16           |
| aridity: group*biogeography              | 83.26  | 1.8099  | <b>4.03E-10</b>  |
